# Supplementary material for: Exploring negative thermal expansion materials with bulk framework structures and their relevant scaling relationships through multi-step machine learning
Source: Royal Society of Chemistry journal article supplement (doi:10.1039/d3mh01509b), 2024-01-01
Supplement: d3mh01509b2.pdf [file d3mh01509b2.pdf]

Supporting Materials

**Searching for Negative Thermal Expansion Materials with Bulk Framework Structures and their Relevant Scaling Relationships through Multi-step Machine Learning**

Yu Cai<sup>a,b</sup>, Chunyan Wang<sup>a,b,c</sup>, Huanli Yuan<sup>c</sup>, Yuan Guo<sup>a,e</sup>, Jun-Hyung Cho<sup>d</sup>, Xianran Xing<sup>e,\*</sup>,  
Yu Jia<sup>\*,a,b,f</sup>

<sup>a</sup> Key Laboratory for Special Functional Materials of Ministry of Education, and School of Materials and Engineering, Henan University, Kaifeng 475001, China

<sup>b</sup> Institute of Quantum Materials and Physics, Henan Academy of Sciences, Zhengzhou 450046, China

<sup>c</sup> School of Physics and Telecommunication Engineering, Zhoukou Normal University, Zhoukou 466001, China

<sup>d</sup>Department of Physics and Research Institute for Natural Science, Hanyang University, 222 Wangsimni-ro, Seongdong-Ku, Seoul 04763, Republic of Korea

<sup>e</sup> Institute of Solid States Chemistry, University of Science and Technology Beijing, Beijing 100083, China

<sup>f</sup> Joint center for Theoretical Physics, and School of Physics and Electronics, Henan University, Kaifeng 475001, China

**Table S1** Thermal expansion training sets. T2 is the upper temperature limit, and the lower temperature limit is uniformly set as 0K. Coefficient of thermal expansion (CTE) is set to one decimal place, T2 to an integer.

| No. | Formula                                                                                                  | Crystal System | CTE (ppm/K) | T2(K) | Reference |
|-----|----------------------------------------------------------------------------------------------------------|----------------|-------------|-------|-----------|
| 1   | Sc <sub>2</sub> Mo <sub>3</sub> O <sub>12</sub>                                                          | orthorhombic   | -6.3        | 300   | 1         |
| 2   | In <sub>0.5</sub> Sc <sub>1.5</sub> (MoO <sub>4</sub> ) <sub>3</sub>                                     | orthorhombic   | -3.8        | 973   | 2         |
| 3   | Sc <sub>1.5</sub> Zr <sub>0.5</sub> Mo <sub>2.5</sub> V <sub>0.5</sub> O <sub>12</sub>                   | orthorhombic   | -2.4        | 673   | 3         |
| 4   | Cr <sub>0.5</sub> ScZr <sub>0.5</sub> Mo <sub>2.5</sub> V <sub>0.5</sub> O <sub>12</sub>                 | orthorhombic   | -1.2        | 673   | 3         |
| 5   | Cr <sub>0.8</sub> Sc <sub>0.7</sub> Zr <sub>0.5</sub> Mo <sub>2.5</sub> V <sub>0.5</sub> O <sub>12</sub> | orthorhombic   | -0.2        | 673   | 3         |
| 6   | La <sub>2</sub> Mo <sub>3</sub> O <sub>12</sub>                                                          | monoclinic     | 19.1        | 1073  | 4         |
| 7   | Er <sub>2</sub> Mo <sub>3</sub> O <sub>12</sub>                                                          | orthorhombic   | -22.7       | 1073  | 4         |
| 8   | Yb <sub>2</sub> Mo <sub>3</sub> O <sub>12</sub>                                                          | orthorhombic   | -18.1       | 1073  | 4         |
| 9   | Lu <sub>2</sub> Mo <sub>3</sub> O <sub>12</sub>                                                          | orthorhombic   | -18.1       | 1073  | 4         |
| 10  | Y <sub>2</sub> Mo <sub>3</sub> O <sub>12</sub>                                                           | orthorhombic   | -28.1       | 1073  | 4         |
| 11  | HfMgW <sub>3</sub> O <sub>12</sub>                                                                       | orthorhombic   | -1.9        | 773   | 5         |
| 12  | Fe <sub>0.2</sub> (HfMg) <sub>0.9</sub> W <sub>3</sub> O <sub>12</sub>                                   | orthorhombic   | -2.0        | 773   | 5         |
| 13  | Fe <sub>0.6</sub> (HfMg) <sub>0.7</sub> W <sub>3</sub> O <sub>12</sub>                                   | orthorhombic   | -2.5        | 773   | 5         |
| 14  | Fe(HfMg) <sub>0.5</sub> W <sub>3</sub> O <sub>12</sub>                                                   | monoclinic     | -3.4        | 773   | 5         |
| 15  | ZrMnMo <sub>3</sub> O <sub>12</sub>                                                                      | orthorhombic   | -8.4        | 873   | 6         |

|    |                                                                                                              |              |       |      |             |
|----|--------------------------------------------------------------------------------------------------------------|--------------|-------|------|-------------|
| 16 | ZrScMo <sub>2</sub> VO <sub>12</sub>                                                                         | orthorhombic | -6.6  | 773  | 7           |
| 17 | Zr <sub>2</sub> MoP <sub>2</sub> O <sub>12</sub>                                                             | orthorhombic | -13.4 | 400  | 8           |
| 18 | Sc <sub>2</sub> W <sub>3</sub> O <sub>12</sub>                                                               | orthorhombic | -6.6  | 450  | 9           |
| 19 | Lu <sub>2</sub> W <sub>3</sub> O <sub>12</sub>                                                               | orthorhombic | -20.4 | 900  | 10          |
| 20 | Y <sub>2</sub> W <sub>3</sub> O <sub>12</sub>                                                                | orthorhombic | -20.9 | 1073 | 11          |
| 21 | ZrScW <sub>2</sub> PO <sub>12</sub>                                                                          | orthorhombic | -5.3  | 1300 | 12          |
| 22 | Zr <sub>2</sub> WP <sub>2</sub> O <sub>12</sub>                                                              | orthorhombic | -14.1 | 298  | 13          |
| 23 | Sc <sub>0.8</sub> (ZrHf) <sub>0.1</sub> FeMo <sub>2.8</sub> V <sub>0.2</sub> O <sub>12</sub>                 | orthorhombic | -0.4  | 650  | 13          |
| 24 | Sc <sub>0.8</sub> (ZrHf) <sub>0.2</sub> Fe <sub>0.8</sub> Mo <sub>2.6</sub> V <sub>0.4</sub> O <sub>12</sub> | orthorhombic | -0.3  | 650  | 13          |
| 25 | Sc <sub>0.8</sub> (ZrHf) <sub>0.3</sub> Fe <sub>0.6</sub> Mo <sub>2.4</sub> V <sub>0.6</sub> O <sub>12</sub> | orthorhombic | -2.6  | 650  | 13          |
| 26 | Sc <sub>0.5</sub> (ZrHf) <sub>0.5</sub> Fe <sub>0.5</sub> Mo <sub>2</sub> VO <sub>12</sub>                   | orthorhombic | -4.0  | 650  | 13          |
| 27 | Zr <sub>2</sub> MoVPO <sub>12</sub>                                                                          | orthorhombic | -7.0  | 700  | 14          |
| 28 | Fe <sub>2</sub> Mo <sub>3</sub> O <sub>12</sub>                                                              | orthorhombic | -44.5 | 1023 | 15          |
| 29 | Cr <sub>2</sub> Mo <sub>3</sub> O <sub>12</sub>                                                              | orthorhombic | -28.2 | 1023 | 15          |
| 30 | Al <sub>2</sub> Mo <sub>3</sub> O <sub>12</sub>                                                              | orthorhombic | -8.5  | 1073 | 15          |
| 31 | Yb <sub>1.6</sub> Al <sub>0.4</sub> (MoO <sub>4</sub> ) <sub>3</sub>                                         | orthorhombic | -16.5 | 840  | 16          |
| 32 | Yb <sub>0.4</sub> Al <sub>1.6</sub> (MoO <sub>4</sub> ) <sub>3</sub>                                         | orthorhombic | 17.2  | 1000 | 16          |
| 33 | Yb <sub>0.2</sub> Al <sub>1.8</sub> (MoO <sub>4</sub> ) <sub>3</sub>                                         | orthorhombic | 28.5  | 950  | 16          |
| 34 | Yb <sub>1.8</sub> Al <sub>0.2</sub> Mo <sub>3</sub> O <sub>12</sub>                                          | orthorhombic | -27.3 | 800  | 16          |
| 35 | In <sub>2</sub> Mo <sub>3</sub> O <sub>12</sub>                                                              | orthorhombic | -5.6  | 1033 | 17          |
| 36 | HfScMo <sub>2</sub> VO <sub>12</sub>                                                                         | orthorhombic | -6.3  | 800  | 18          |
| 37 | HfScW <sub>2</sub> PO <sub>12</sub>                                                                          | orthorhombic | -3.8  | 1469 | 19          |
| 38 | Cr <sub>2</sub> (WO <sub>4</sub> ) <sub>3</sub>                                                              | orthorhombic | -21.1 | 1073 | 20          |
| 39 | Dy <sub>2</sub> (WO <sub>4</sub> ) <sub>3</sub>                                                              | monoclinic   | 22.9  | 1073 | 21          |
| 40 | Nd <sub>2</sub> (WO <sub>4</sub> ) <sub>3</sub>                                                              | monoclinic   | 16.6  | 1073 | 21          |
| 41 | In <sub>2</sub> (WO <sub>4</sub> ) <sub>3</sub>                                                              | orthorhombic | -9.0  | 973  | 22          |
| 42 | In <sub>1.9</sub> Sc <sub>0.1</sub> W <sub>3</sub> O <sub>12</sub>                                           | orthorhombic | -15.9 | 973  | 22          |
| 43 | In <sub>1.7</sub> Sc <sub>0.3</sub> W <sub>3</sub> O <sub>12</sub>                                           | orthorhombic | -3.2  | 973  | 22          |
| 44 | In <sub>1.5</sub> Sc <sub>0.5</sub> W <sub>3</sub> O <sub>12</sub>                                           | orthorhombic | -3.8  | 973  | 22          |
| 45 | InScW <sub>3</sub> O <sub>12</sub>                                                                           | orthorhombic | -21.4 | 973  | 22          |
| 46 | Yb <sub>2</sub> W <sub>3</sub> O <sub>12</sub>                                                               | orthorhombic | -19.1 | 1073 | 23          |
| 47 | Er <sub>2</sub> W <sub>3</sub> O <sub>12</sub>                                                               | orthorhombic | -20.2 | 1073 | 23          |
| 48 | HfMg <sub>0.8</sub> Zn <sub>0.2</sub> Mo <sub>3</sub> O <sub>12</sub>                                        | orthorhombic | -0.2  | 673  | 24          |
| 49 | HfMg <sub>0.7</sub> Zn <sub>0.3</sub> Mo <sub>3</sub> O <sub>12</sub>                                        | orthorhombic | -0.3  | 673  | 24          |
| 50 | HfMg <sub>0.6</sub> Zn <sub>0.4</sub> Mo <sub>3</sub> O <sub>12</sub>                                        | orthorhombic | -0.3  | 673  | 24          |
| 51 | HfMg <sub>0.5</sub> Zn <sub>0.5</sub> Mo <sub>3</sub> O <sub>12</sub>                                        | orthorhombic | -0.3  | 840  | 24          |
| 52 | HfMgMo <sub>1.5</sub> W <sub>1.5</sub> O <sub>12</sub>                                                       | orthorhombic | -6.2  | 550  | 25          |
| 53 | In(HfMg) <sub>0.5</sub> Mo <sub>3</sub> O <sub>12</sub>                                                      | orthorhombic | -1.2  | 923  | 26          |
| 54 | In <sub>1.75</sub> Y <sub>0.25</sub> Mo <sub>3</sub> O <sub>12</sub>                                         | orthorhombic | -11.3 | 1073 | [this work] |
| 55 | In <sub>1.5</sub> Y <sub>0.5</sub> Mo <sub>3</sub> O <sub>12</sub>                                           | orthorhombic | -10.1 | 1073 | [this work] |
| 56 | In <sub>1.25</sub> Y <sub>0.75</sub> Mo <sub>3</sub> O <sub>12</sub>                                         | orthorhombic | -13.3 | 1073 | [this work] |

|    |                                                                                  |              |       |      |             |
|----|----------------------------------------------------------------------------------|--------------|-------|------|-------------|
| 57 | $\text{InYMo}_3\text{O}_{12}$                                                    | orthorhombic | -12.9 | 1073 | [this work] |
| 58 | $\text{In}_{0.75}\text{Y}_{1.25}\text{Mo}_3\text{O}_{12}$                        | orthorhombic | -16.4 | 1073 | [this work] |
| 59 | $\text{In}_{0.5}\text{Y}_{1.5}\text{Mo}_3\text{O}_{12}$                          | orthorhombic | -5.6  | 1033 | [this work] |
| 60 | $\text{ZrMg}_{0.7}\text{Al}_{0.3}\text{Mo}_{2.7}\text{V}_{0.3}\text{O}_{12}$     | orthorhombic | -7.7  | 300  | 27          |
| 61 | $\text{ZrMg}_{0.4}\text{Al}_{0.6}\text{Mo}_{2.4}\text{V}_{0.6}\text{O}_{12}$     | orthorhombic | -9.5  | 313  | 27          |
| 62 | $\text{ZrMg}_{0.3}\text{Al}_{0.7}\text{Mo}_{2.3}\text{V}_{0.7}\text{O}_{12}$     | orthorhombic | -11.4 | 320  | 27          |
| 63 | $\text{Y}_{0.25}\text{Nd}_{1.75}(\text{W O}_4)_3$                                | monoclinic   | 18.9  | 800  | 28          |
| 64 | $\text{Ho}_2(\text{Mo O}_4)_3$                                                   | orthorhombic | -21.8 | 473  | 29          |
| 65 | $\text{Zr}_{0.26}\text{Sc}_{1.74}\text{Mo}_{2.878}\text{V}_{0.122}\text{O}_{12}$ | orthorhombic | -5.0  | 575  | 30          |
| 66 | $(\text{Nd}_{1.8}\text{Er}_{0.2})\text{W}_3\text{O}_{12}$                        | monoclinic   | 8.3   | 1073 | 31          |
| 67 | $(\text{Nd}_{1.6}\text{Er}_{0.4})\text{W}_3\text{O}_{12}$                        | monoclinic   | 7.7   | 1073 | 31          |
| 68 | $(\text{Nd}_{0.5}\text{Er}_{1.5})\text{W}_3\text{O}_{12}$                        | orthorhombic | -6.3  | 1073 | 31          |
| 69 | $(\text{Nd}_{0.3}\text{Er}_{1.7})\text{W}_3\text{O}_{12}$                        | orthorhombic | -6.2  | 1073 | 31          |
| 70 | $(\text{Nd}_{0.1}\text{Er}_{1.9})\text{W}_3\text{O}_{12}$                        | orthorhombic | -6.0  | 1073 | 31          |
| 71 | $\text{Zr}_2\text{P}_2\text{SO}_{12}$                                            | monoclinic   | -23.0 | 373  | 32          |
| 72 | $(\text{KMg})_{0.25}\text{Sc}_{1.75}\text{W}_3\text{O}_{12}$                     | hexagonal    | -13.8 | 700  | 33          |
| 73 | $(\text{KMg})_{0.5}\text{Sc}_{1.5}\text{W}_3\text{O}_{12}$                       | hexagonal    | -7.5  | 700  | 33          |
| 74 | $(\text{KMg})_{0.75}\text{Sc}_{1.25}\text{W}_3\text{O}_{12}$                     | hexagonal    | -10.0 | 700  | 33          |
| 75 | $(\text{KMg})\text{ScW}_3\text{O}_{12}$                                          | hexagonal    | -14.1 | 700  | 33          |
| 76 | $(\text{KMg})_{1.25}\text{Sc}_{0.75}\text{W}_3\text{O}_{12}$                     | hexagonal    | -13.8 | 700  | 33          |
| 77 | $(\text{KMg})_{1.5}\text{Sc}_{0.5}\text{W}_3\text{O}_{12}$                       | hexagonal    | -5.9  | 520  | 33          |
| 78 | $\text{NaTi}_2\text{P}_3\text{O}_{12}$                                           | trigonal     | -0.6  | 1273 | 34          |
| 79 | $\text{NaZr}_2\text{P}_3\text{O}_{12}$                                           | trigonal     | -0.4  | 1273 | 34          |
| 80 | $\text{Ag}_2\text{O}$                                                            | cubic        | -31.2 | 200  | 35          |
| 81 | $\text{Cu}_2\text{O}$                                                            | cubic        | -7.2  | 240  | 35          |
| 82 | $\text{Au}_2\text{O}$                                                            | cubic        | -2.0  | 273  | 35          |
| 83 | $\text{CaZr}_4(\text{PO}_4)_6$                                                   | trigonal     | -0.2  | 673  | 36          |
| 84 | $\text{TaVO}_5$                                                                  | orthorhombic | -8.9  | 873  | 37          |
| 85 | $\text{NbVO}_5$                                                                  | orthorhombic | -6.6  | 873  | 37          |
| 86 | $\text{Zr}_{0.5}\text{Hf}_{0.5}\text{V}_2\text{O}_7$                             | cubic        | -2.3  | 673  | 38          |
| 87 | $\text{ZrV}_2\text{O}_7$                                                         | cubic        | -21.0 | 1023 | 39          |
| 88 | $\text{HfV}_2\text{O}_7$                                                         | cubic        | -21.0 | 300  | 39          |
| 89 | $\text{ThP}_2\text{O}_7$                                                         | cubic        | -9.4  | 1174 | 40          |
| 90 | $\text{UP}_2\text{O}_7$                                                          | cubic        | -8.2  | 1073 | 40          |
| 91 | $\text{CeP}_2\text{O}_7$                                                         | cubic        | -5.7  | 1078 | 41          |
| 92 | $\text{Th}_2\text{O}(\text{PO}_4)_2$                                             | orthorhombic | -4.8  | 873  | 41          |
| 93 | $\text{Cu}_2\text{V}_2\text{O}_7$                                                | orthorhombic | -5.3  | 500  | 42          |
| 94 | $\text{Cu}_2\text{V}_2\text{O}_7$                                                | monoclinic   | -20.2 | 673  | 43          |
| 95 | $\text{U}_2\text{O}(\text{PO}_4)_2$                                              | orthorhombic | -4.2  | 873  | 44          |
| 96 | $\text{NbOPO}_4$                                                                 | orthorhombic | -11.0 | 973  | 45          |
| 97 | $\text{PbAlBO}_4$                                                                | orthorhombic | 18.0  | 1000 | 46          |

|     |                                                                                     |              |       |      |    |
|-----|-------------------------------------------------------------------------------------|--------------|-------|------|----|
| 98  | $\text{K}_2 \text{Th} (\text{P O}_4)_2$                                             | tetragonal   | 33.6  | 900  | 47 |
| 99  | $\text{Ca}_2 \text{Mn}_{0.35} \text{Ti}_{0.65} \text{O}_4$                          | tetragonal   | 17.9  | 300  | 48 |
| 100 | $\text{Ca}_2 \text{Mn}_{0.3} \text{Ti}_{0.7} \text{O}_4$                            | tetragonal   | 51.7  | 400  | 48 |
| 101 | $\text{Ca}_{1.6} \text{Sr}_{0.4} \text{Mn O}_4$                                     | tetragonal   | 30.3  | 300  | 48 |
| 102 | $\text{Ca}_2 \text{Mn O}_4$                                                         | tetragonal   | 38.6  | 400  | 48 |
| 103 | $\text{Ca}_{1.4} \text{Sr}_{0.6} \text{Mn O}_4$                                     | tetragonal   | 29.9  | 300  | 48 |
| 104 | $\text{Ca}_{1.8} \text{Sr}_{0.2} \text{Mn O}_4$                                     | tetragonal   | 15.2  | 300  | 48 |
| 105 | $\text{Ca}_2 \text{Mn}_{0.375} \text{Ti}_{0.625} \text{O}_4$                        | tetragonal   | 37.0  | 400  | 48 |
| 106 | $\text{Ca}_2 \text{Mn}_{0.575} \text{Ti}_{0.425} \text{O}_4$                        | tetragonal   | 37.5  | 400  | 48 |
| 107 | $\text{Ca}_2 \text{GeO}_4$                                                          | tetragonal   | 19.2  | 400  | 49 |
| 108 | $\text{La} (\text{Cr O}_3)$                                                         | orthorhombic | 22.9  | 1013 | 50 |
| 109 | $\text{Cu}_2 \text{O Cl}_2$                                                         | orthorhombic | 32.4  | 723  | 51 |
| 110 | $(\text{V}_{0.98} \text{Mo}_{0.02})_2 \text{O}_3$                                   | monoclinic   | -3.9  | 125  | 52 |
| 111 | $(\text{V}_{0.97} \text{Mo}_{0.03})_2 \text{O}_3$                                   | monoclinic   | -3.9  | 125  | 52 |
| 112 | $(\text{V}_{0.9} \text{Mo}_{0.1})_2 \text{O}_3$                                     | trigonal     | 16.0  | 300  | 52 |
| 113 | $(\text{V}_{0.8} \text{Mo}_{0.2})_2 \text{O}_3$                                     | trigonal     | 11.0  | 300  | 52 |
| 114 | $\text{Zr}_{0.5} \text{Sn}_{0.5} \text{Mo}_2 \text{O}_8$                            | cubic        | -6.3  | 800  | 53 |
| 115 | $\text{Zr} (\text{Mo O}_4)_2$                                                       | orthorhombic | -3.6  | 500  | 54 |
| 116 | $\text{ZrW}_{1.5} \text{Mo}_{0.5} \text{O}_8$                                       | cubic        | -15.3 | 343  | 55 |
| 117 | $\text{ZrW}_{1.8} \text{Mo}_{0.2} \text{O}_8$                                       | cubic        | -11.8 | 403  | 55 |
| 118 | $\text{ZrW}_{1.6} \text{Mo}_{0.4} \text{O}_8$                                       | cubic        | -9.0  | 343  | 55 |
| 119 | $\text{Cu}_2 \text{Sc}_2 (\text{Ge}_4 \text{O}_{13})$                               | monoclinic   | 8.4   | 293  | 56 |
| 120 | $\text{Sr}_2 \text{Mg} (\text{W O}_6)$                                              | tetragonal   | 21.3  | 300  | 57 |
| 121 | $\text{Zr} (\text{W Mo}) \text{O}_8$                                                | trigonal     | 69.0  | 673  | 58 |
| 122 | $\text{Zr} (\text{W Mo}) \text{O}_8$                                                | cubic        | -4.0  | 973  | 59 |
| 123 | $\text{Cs} (\text{Al Si O}_4)$                                                      | orthorhombic | 37.9  | 1098 | 60 |
| 124 | $\text{Sn} (\text{Mo}_2 \text{O}_8)$                                                | cubic        | 30.0  | 373  | 61 |
| 125 | $\text{Sr}_2 (\text{Ir O}_4)$                                                       | tetragonal   | 32.0  | 1200 | 62 |
| 126 | $\text{Zr} (\text{W}_{0.9} \text{Mo}_{0.1})_{1.76} \text{V}_{0.24} \text{O}_{7.88}$ | cubic        | -11.0 | 550  | 63 |
| 127 | $\text{Sr}_2 \text{Rh O}_4$                                                         | tetragonal   | 43.8  | 850  | 64 |
| 128 | $\text{Tc O}_2$                                                                     | orthorhombic | 24.6  | 1273 | 65 |
| 129 | $\text{Zr} (\text{W O}_4)_2$                                                        | cubic        | -27.3 | 693  | 66 |
| 130 | $\text{Si O}_2$                                                                     | monoclinic   | -9.1  | 550  | 67 |
| 131 | $\text{Si}_{36} \text{O}_{72}$                                                      | orthorhombic | -24.2 | 560  | 68 |
| 132 | $\text{Lu}_5 \text{Ba}_6 \text{B}_9 \text{O}_{27}$                                  | monoclinic   | 27.7  | 473  | 69 |
| 133 | $\text{Cs}_3 \text{W}_3 \text{P O}_{13}$                                            | orthorhombic | 20.6  | 270  | 70 |
| 134 | $\text{Cs}_2 ((\text{Np O}_2)_2 (\text{S O}_4)_3)$                                  | tetragonal   | 70.1  | 293  | 71 |
| 135 | $\text{Cs}_2 ((\text{NpO}_2)_2 (\text{SeO}_4)_{0.18} (\text{SO}_4)_{2.82})$         | tetragonal   | 56.6  | 293  | 71 |
| 136 | $\text{Cs}_2 ((\text{NpO}_2)_2 (\text{SeO}_4)_{0.55} (\text{SO}_4)_{2.45})$         | tetragonal   | 63.6  | 293  | 71 |
| 137 | $\text{Cs}_2 ((\text{NpO}_2)_2 (\text{SeO}_4)_{1.19} (\text{S O}_4)_{1.81})$        | tetragonal   | 63.0  | 293  | 71 |
| 138 | $\text{Cs}_2 ((\text{Np O}_2)_2 (\text{Se O}_4)_3)$                                 | tetragonal   | 91.2  | 293  | 71 |
| 139 | $(\text{Er}_{0.25} \text{Dy}_{1.75}) (\text{Mo}_4 \text{O}_{15})$                   | monoclinic   | 25.1  | 773  | 72 |
| 140 | $\text{HfW}_2 \text{O}_8$                                                           | cubic        | -26.4 | 300  | 73 |
| 141 | $\text{HfMo}_2 \text{O}_8$                                                          | orthorhombic | -12.0 | 573  | 74 |

|     |                                                                               |              |       |      |    |
|-----|-------------------------------------------------------------------------------|--------------|-------|------|----|
| 142 | Zn O                                                                          | cubic        | -5.1  | 40   | 75 |
| 143 | H <sub>1.90</sub> (Al <sub>1.90</sub> Si <sub>190.10</sub> O <sub>384</sub> ) | cubic        | -13.8 | 573  | 76 |
| 144 | Si O <sub>2</sub> (C O <sub>2</sub> ) <sub>0.542</sub>                        | cubic        | -16.7 | 1173 | 77 |
| 145 | Cu Sc O <sub>2</sub>                                                          | hexagonal    | -4.0  | 300  | 78 |
| 146 | LiAlSiO <sub>4</sub>                                                          | trigonal     | -6.2  | 1273 | 79 |
| 147 | GeZn <sub>2</sub> O <sub>4</sub>                                              | trigonal     | -2.0  | 300  | 80 |
| 148 | CuZnV <sub>2</sub> O <sub>7</sub>                                             | monoclinic   | -2.3  | 673  | 81 |
| 149 | Cu <sub>2</sub> P <sub>2</sub> O <sub>7</sub>                                 | monoclinic   | -27.7 | 373  | 82 |
| 150 | Cu <sub>0.5</sub> Zn <sub>1.5</sub> P <sub>2</sub> O <sub>7</sub>             | monoclinic   | -2.8  | 225  | 83 |
| 151 | CuZnP <sub>2</sub> O <sub>7</sub>                                             | monoclinic   | -4.3  | 175  | 83 |
| 152 | Cu <sub>1.25</sub> Zn <sub>0.75</sub> P <sub>2</sub> O <sub>7</sub>           | monoclinic   | -6.2  | 225  | 83 |
| 153 | Cu <sub>1.5</sub> Zn <sub>0.5</sub> P <sub>2</sub> O <sub>7</sub>             | monoclinic   | -12.4 | 275  | 83 |
| 154 | Cu <sub>1.75</sub> Zn <sub>0.25</sub> P <sub>2</sub> O <sub>7</sub>           | monoclinic   | -15.4 | 350  | 83 |
| 155 | MgH <sub>2</sub> SO <sub>5</sub>                                              | monoclinic   | 34.1  | 293  | 84 |
| 156 | FeH <sub>2</sub> SO <sub>5</sub>                                              | monoclinic   | 46.6  | 293  | 84 |
| 157 | CoH <sub>2</sub> SO <sub>5</sub>                                              | monoclinic   | 33.4  | 293  | 84 |
| 158 | NiH <sub>2</sub> SO <sub>5</sub>                                              | monoclinic   | 35.5  | 293  | 84 |
| 159 | (NH <sub>4</sub> ) <sub>2</sub> V <sub>3</sub> O <sub>8</sub>                 | tetragonal   | 82.1  | 170  | 85 |
| 160 | AlPO <sub>4</sub>                                                             | hexagonal    | -35.1 | 300  | 86 |
| 161 | Ti <sub>2</sub> O <sub>3</sub>                                                | trigonal     | 19.0  | 593  | 87 |
| 162 | LiBO <sub>2</sub>                                                             | monoclinic   | 27.0  | 330  | 88 |
| 163 | H <sub>2</sub> O                                                              | hexagonal    | -4.0  | 60   | 89 |
| 164 | SrO                                                                           | cubic        | 41.2  | 300  | 90 |
| 165 | SrTiO <sub>3</sub>                                                            | cubic        | 28.2  | 300  | 90 |
| 166 | SrZrO <sub>3</sub>                                                            | orthorhombic | 26.3  | 300  | 90 |
| 167 | TiO <sub>2</sub>                                                              | tetragonal   | 23.7  | 300  | 90 |
| 168 | ZrO <sub>2</sub>                                                              | monoclinic   | 21.2  | 300  | 90 |
| 169 | ZrSiO <sub>4</sub>                                                            | tetragonal   | 12.3  | 300  | 90 |
| 170 | KNbO <sub>3</sub>                                                             | tetragonal   | 15.0  | 300  | 90 |
| 171 | LiAlSi <sub>2</sub> O <sub>6</sub>                                            | monoclinic   | 22.2  | 300  | 90 |
| 172 | MgFe <sub>2</sub> O <sub>4</sub>                                              | cubic        | 20.5  | 300  | 90 |
| 173 | MgGeO <sub>3</sub>                                                            | orthorhombic | 22.4  | 300  | 90 |
| 174 | MgO                                                                           | cubic        | 32.4  | 300  | 90 |
| 175 | Mg <sub>2</sub> GeO <sub>4</sub>                                              | cubic        | 32.1  | 300  | 90 |
| 176 | MnO                                                                           | cubic        | 34.5  | 300  | 90 |
| 177 | Mo <sub>3</sub> Fe <sub>2</sub> O <sub>12</sub>                               | monoclinic   | 29.1  | 300  | 90 |
| 178 | NaAlSi <sub>2</sub> O <sub>6</sub>                                            | monoclinic   | 24.7  | 300  | 90 |
| 179 | NaAlSi <sub>3</sub> O <sub>8</sub>                                            | triclinic    | 26.8  | 300  | 90 |
| 180 | NaCrSi <sub>2</sub> O <sub>6</sub>                                            | monoclinic   | 20.4  | 300  | 90 |
| 181 | NaNbO <sub>3</sub>                                                            | cubic        | 33.0  | 300  | 90 |
| 182 | ReO <sub>3</sub>                                                              | cubic        | -7.7  | 300  | 90 |
| 183 | ScAlO <sub>3</sub>                                                            | orthorhombic | 27.0  | 300  | 90 |
| 184 | Al <sub>2</sub> SiO <sub>5</sub>                                              | orthorhombic | 13.3  | 300  | 90 |
| 185 | BPO <sub>4</sub>                                                              | tetragonal   | 28.2  | 300  | 90 |

|     |                                                                 |              |       |     |    |
|-----|-----------------------------------------------------------------|--------------|-------|-----|----|
| 186 | BeAl <sub>2</sub> O <sub>4</sub>                                | orthorhombic | 23.8  | 300 | 90 |
| 187 | BeO                                                             | hexagonal    | 17.0  | 300 | 90 |
| 188 | Be <sub>2</sub> SiO <sub>4</sub>                                | trigonal     | 16.8  | 300 | 90 |
| 189 | CaGeO <sub>3</sub>                                              | orthorhombic | 31.1  | 300 | 90 |
| 190 | Ca O <sub>3</sub> Ti                                            | orthorhombic | 75.0  | 300 | 90 |
| 191 | CaO                                                             | cubic        | 37.5  | 300 | 90 |
| 192 | Ca <sub>3</sub> Al <sub>2</sub> Si <sub>3</sub> O <sub>12</sub> | cubic        | 19.2  | 300 | 90 |
| 193 | Ca <sub>3</sub> Fe <sub>2</sub> Si <sub>3</sub> O <sub>12</sub> | cubic        | 20.6  | 300 | 90 |
| 194 | Cr <sub>2</sub> FeO <sub>4</sub>                                | cubic        | 9.9   | 300 | 90 |
| 195 | Cr <sub>2</sub> MgO <sub>4</sub>                                | cubic        | 16.5  | 300 | 90 |
| 196 | FeO                                                             | cubic        | 33.9  | 300 | 90 |
| 197 | FeTiO <sub>3</sub>                                              | trigonal     | 27.9  | 300 | 90 |
| 198 | Fe <sub>3</sub> O <sub>4</sub>                                  | cubic        | 20.6  | 300 | 90 |
| 199 | HfO <sub>2</sub>                                                | monoclinic   | 15.8  | 300 | 90 |
| 200 | Al <sub>2</sub> FeO <sub>4</sub>                                | cubic        | 15.6  | 300 | 90 |
| 201 | Al <sub>2</sub> Fe <sub>3</sub> Si <sub>3</sub> O <sub>12</sub> | cubic        | 15.8  | 300 | 90 |
| 202 | Al <sub>2</sub> Mg <sub>3</sub> Si <sub>3</sub> O <sub>12</sub> | cubic        | 19.9  | 300 | 90 |
| 203 | AlMn <sub>3</sub> Si <sub>3</sub> O <sub>12</sub>               | cubic        | 17.2  | 300 | 90 |
| 204 | KF                                                              | cubic        | 95.1  | 300 | 90 |
| 205 | LiF                                                             | cubic        | 106.5 | 300 | 90 |
| 206 | MgF <sub>2</sub>                                                | tetragonal   | 33.0  | 300 | 90 |
| 207 | NaF                                                             | cubic        | 102.6 | 300 | 90 |
| 208 | NaMgF <sub>3</sub>                                              | orthorhombic | 102.0 | 300 | 90 |
| 209 | MnF <sub>2</sub>                                                | tetragonal   | 20.1  | 300 | 90 |
| 210 | CoF <sub>2</sub>                                                | tetragonal   | 24.5  | 300 | 90 |
| 211 | NiF <sub>2</sub>                                                | tetragonal   | 23.4  | 300 | 90 |
| 212 | FeF <sub>2</sub>                                                | tetragonal   | 33.1  | 300 | 90 |
| 213 | KBr                                                             | cubic        | 117.6 | 300 | 90 |
| 214 | KCl                                                             | cubic        | 114.9 | 300 | 90 |
| 215 | KI                                                              | cubic        | 113.7 | 300 | 90 |
| 216 | LiBr                                                            | cubic        | 146.7 | 300 | 90 |
| 217 | LiCl                                                            | cubic        | 131.1 | 300 | 90 |
| 218 | LiI                                                             | cubic        | 177.0 | 300 | 90 |
| 219 | NaBr                                                            | cubic        | 125.7 | 300 | 90 |
| 220 | NaCl                                                            | cubic        | 121.2 | 300 | 90 |
| 221 | NaI                                                             | cubic        | 135.0 | 300 | 90 |
| 222 | RbBr                                                            | cubic        | 117.0 | 300 | 90 |
| 223 | RbCl                                                            | cubic        | 120.6 | 300 | 90 |
| 224 | RbI                                                             | cubic        | 114.0 | 300 | 90 |
| 225 | Bi <sub>2</sub> Se <sub>3</sub>                                 | trigonal     | 41.0  | 300 | 90 |
| 226 | AgCl                                                            | cubic        | 98.7  | 300 | 90 |
| 227 | CuCl                                                            | cubic        | -10.0 | 400 | 90 |
| 228 | CuBr                                                            | cubic        | -2.0  | 320 | 90 |
| 229 | AgBr                                                            | cubic        | 102.3 | 300 | 90 |

|     |                                                 |              |       |     |    |
|-----|-------------------------------------------------|--------------|-------|-----|----|
| 230 | TiC                                             | cubic        | 22.2  | 300 | 90 |
| 231 | B <sub>4</sub> C                                | trigonal     | 13.5  | 300 | 90 |
| 232 | HgCl                                            | tetragonal   | 132.8 | 300 | 90 |
| 233 | HgI                                             | tetragonal   | 115.4 | 300 | 90 |
| 234 | HgI <sub>2</sub>                                | tetragonal   | 49.0  | 300 | 90 |
| 235 | SiC                                             | trigonal     | 14.1  | 300 | 90 |
| 236 | Al <sub>2</sub> O <sub>3</sub>                  | trigonal     | 26.4  | 300 | 91 |
| 237 | Sr <sub>3</sub> Ir <sub>2</sub> O <sub>7</sub>  | orthorhombic | 23.6  | 300 | 92 |
| 238 | Na <sub>2</sub> Ti <sub>3</sub> O <sub>7</sub>  | monoclinic   | 21.0  | 300 | 93 |
| 239 | GeMg <sub>2</sub> O <sub>4</sub>                | cubic        | 9.1   | 300 | 94 |
| 240 | GeCd <sub>2</sub> O <sub>4</sub>                | orthorhombic | 10.1  | 300 | 94 |
| 241 | Nb <sub>14</sub> W <sub>3</sub> O <sub>44</sub> | monoclinic   | -12.8 | 433 | 95 |
| 242 | SrWO <sub>4</sub>                               | tetragonal   | 24.9  | 620 | 96 |
| 243 | BaWO <sub>4</sub>                               | tetragonal   | 27.2  | 620 | 96 |
| 244 | PbWO <sub>4</sub>                               | tetragonal   | 36.0  | 620 | 96 |
| 245 | CaWO <sub>4</sub>                               | tetragonal   | 25.0  | 620 | 96 |
| 246 | CaMoO <sub>4</sub>                              | tetragonal   | 27.2  | 620 | 96 |
| 247 | CdMoO <sub>4</sub>                              | tetragonal   | 28.8  | 620 | 96 |
| 248 | SrMoO <sub>4</sub>                              | tetragonal   | 30.8  | 300 | 96 |
| 249 | PbMoO <sub>4</sub>                              | tetragonal   | 37.8  | 300 | 96 |
| 250 | NaIO <sub>4</sub>                               | tetragonal   | 131.2 | 300 | 96 |
| 251 | KIO <sub>4</sub>                                | tetragonal   | 107.3 | 300 | 96 |
| 252 | RuO <sub>2</sub>                                | tetragonal   | 12.4  | 300 | 96 |
| 253 | CrO <sub>2</sub>                                | tetragonal   | 22.4  | 300 | 96 |
| 254 | SnO <sub>2</sub>                                | tetragonal   | 10.3  | 300 | 96 |
| 255 | PbO <sub>2</sub>                                | tetragonal   | 26.1  | 300 | 96 |
| 256 | VO <sub>2</sub>                                 | tetragonal   | 38.1  | 300 | 96 |
| 257 | GeO <sub>2</sub>                                | tetragonal   | 13.9  | 300 | 96 |
| 258 | CaCO <sub>3</sub>                               | trigonal     | 25.1  | 300 | 96 |
| 259 | CdCO <sub>3</sub>                               | trigonal     | 18.9  | 300 | 96 |
| 260 | MnCO <sub>3</sub>                               | trigonal     | 21.8  | 300 | 96 |
| 261 | ZnCO <sub>3</sub>                               | trigonal     | 23.5  | 300 | 96 |
| 262 | NaNO <sub>3</sub>                               | trigonal     | 113.4 | 300 | 96 |
| 263 | ScBO <sub>3</sub>                               | trigonal     | 9.7   | 300 | 96 |
| 264 | CaMgSi <sub>2</sub> O <sub>6</sub>              | monoclinic   | 28.0  | 300 | 97 |
| 265 | Al                                              | cubic        | 23.1  | 300 | 98 |
| 266 | Sb                                              | cubic        | 11.0  | 300 | 98 |
| 267 | Be                                              | cubic        | 11.3  | 300 | 98 |
| 268 | Cd                                              | hexagonal    | 30.8  | 300 | 98 |
| 269 | Co                                              | cubic        | 13.0  | 300 | 98 |
| 270 | Ge                                              | cubic        | 5.7   | 300 | 98 |
| 271 | Cu                                              | cubic        | 16.5  | 300 | 98 |
| 272 | Au                                              | cubic        | 14.2  | 300 | 98 |
| 273 | In                                              | cubic        | 32.1  | 300 | 98 |

|     |                                                                                       |              |       |      |     |
|-----|---------------------------------------------------------------------------------------|--------------|-------|------|-----|
| 274 | Ir                                                                                    | cubic        | 6.4   | 300  | 98  |
| 275 | Fe                                                                                    | cubic        | 11.8  | 300  | 98  |
| 276 | Pb                                                                                    | cubic        | 28.9  | 300  | 98  |
| 277 | Mg                                                                                    | cubic        | -0.2  | 100  | 98  |
| 278 | Ni                                                                                    | cubic        | 13.4  | 300  | 98  |
| 279 | Nb                                                                                    | cubic        | 7.3   | 300  | 98  |
| 280 | Pd                                                                                    | cubic        | 11.8  | 300  | 98  |
| 281 | Pt                                                                                    | cubic        | 8.8   | 300  | 98  |
| 282 | Rh                                                                                    | cubic        | 8.2   | 300  | 98  |
| 283 | Si                                                                                    | cubic        | -0.4  | 100  | 98  |
| 284 | Ag                                                                                    | cubic        | 18.9  | 300  | 98  |
| 285 | Ta                                                                                    | cubic        | 6.3   | 300  | 98  |
| 286 | Tl                                                                                    | cubic        | 29.9  | 300  | 98  |
| 287 | Sn                                                                                    | cubic        | 22.0  | 300  | 98  |
| 288 | Ti                                                                                    | cubic        | 8.6   | 300  | 98  |
| 289 | U                                                                                     | cubic        | 13.9  | 300  | 98  |
| 290 | V                                                                                     | cubic        | 8.4   | 300  | 98  |
| 291 | Zn                                                                                    | hexagonal    | 30.2  | 300  | 98  |
| 292 | UP                                                                                    | cubic        | 8.7   | 300  | 98  |
| 293 | UN                                                                                    | cubic        | 8.9   | 300  | 98  |
| 294 | Mg <sub>2</sub> SiO <sub>4</sub>                                                      | orthorhombic | 9.0   | 300  | 99  |
| 295 | Na Sr <sub>5</sub> (B O <sub>3</sub> ) (Si O <sub>4</sub> ) <sub>2</sub>              | monoclinic   | 8.0   | 300  | 100 |
| 296 | BaTi <sub>4</sub> O <sub>9</sub>                                                      | orthorhombic | 8.1   | 300  | 101 |
| 297 | Na <sub>2</sub> Ca <sub>3</sub> (Si <sub>6</sub> O <sub>16</sub> )                    | Triclinic    | 7.5   | 300  | 102 |
| 298 | La <sub>4</sub> Ti <sub>2</sub> O <sub>4</sub> Se <sub>5</sub>                        | orthorhombic | -0.5  | 100  | 103 |
| 299 | Ba <sub>2</sub> K <sub>2</sub> Te <sub>2</sub> O <sub>9</sub>                         | hexagonal    | 6.0   | 293  | 104 |
| 300 | MgSiO <sub>3</sub>                                                                    | monoclinic   | 9.0   | 293  | 105 |
| 301 | Al <sub>2</sub> TiO <sub>5</sub>                                                      | orthorhombic | 8.0   | 300  | 106 |
| 302 | K Na <sub>3</sub> (Al <sub>4</sub> Si <sub>4</sub> O <sub>16</sub> )                  | hexagonal    | 49.0  | 300  | 107 |
| 303 | Na Ca <sub>2</sub> Fe <sub>5</sub> Si <sub>8</sub> O <sub>22</sub> (O H) <sub>2</sub> | monoclinic   | 33.0  | 300  | 108 |
| 304 | Ca <sub>2</sub> Mg (Si <sub>2</sub> O <sub>7</sub> )                                  | tetragonal   | 33.0  | 300  | 109 |
| 305 | Ca <sub>2</sub> Al <sub>2</sub> Si O <sub>7</sub>                                     | tetragonal   | 26.0  | 300  | 110 |
| 306 | Fe <sub>2</sub> Si O <sub>4</sub>                                                     | orthorhombic | 31.0  | 300  | 111 |
| 307 | Ca <sub>3</sub> Mg (Si O <sub>4</sub> ) <sub>2</sub>                                  | monoclinic   | 42.0  | 300  | 112 |
| 308 | Mg <sub>3</sub> Al <sub>2</sub> Si <sub>3</sub> O <sub>12</sub>                       | cubic        | 26.0  | 300  | 113 |
| 309 | Al <sub>2</sub> (Si O <sub>4</sub> ) (O H) <sub>2</sub>                               | orthorhombic | 25.0  | 300  | 114 |
| 310 | SmFe <sub>3</sub> (BO <sub>3</sub> ) <sub>4</sub>                                     | trigonal     | -2.1  | 400  | 115 |
| 311 | Pr <sub>2</sub> (SO <sub>4</sub> ) <sub>3</sub>                                       | monoclinic   | 15.6  | 300  | 116 |
| 312 | BaZn <sub>2</sub> Si <sub>2</sub> O <sub>7</sub>                                      | orthorhombic | 0.0   | 1000 | 117 |
| 313 | Ca <sub>2</sub> RuO <sub>4</sub>                                                      | orthorhombic | -48.5 | 340  | 118 |
| 314 | AgCN                                                                                  | trigonal     | -14.8 | 300  | 119 |
| 315 | AuCN                                                                                  | hexagonal    | -6.9  | 300  | 119 |
| 316 | CuCN                                                                                  | trigonal     | -27.9 | 300  | 119 |
| 317 | (Ag <sub>0.5</sub> Au <sub>0.5</sub> )CN                                              | orthorhombic | -9.0  | 490  | 120 |



|     |                                                                                    |              |        |     |     |
|-----|------------------------------------------------------------------------------------|--------------|--------|-----|-----|
| 318 | $(\text{Cu}_{0.5}\text{Au}_{0.5})\text{CN}$                                        | orthorhombic | -13.8  | 490 | 120 |
| 319 | $\text{Zn}(\text{CN})_2$                                                           | cubic        | -50.7  | 375 | 121 |
| 320 | $\text{Cd}(\text{CN})_2$                                                           | cubic        | -61.2  | 375 | 121 |
| 321 | $\text{AgB}(\text{CN})_4$                                                          | cubic        | -40.0  | 400 | 122 |
| 322 | $\text{CuB}(\text{CN})_4$                                                          | cubic        | -10.0  | 400 | 122 |
| 323 | $\text{ZnNi}(\text{CN})_4$                                                         | tetragonal   | -27.0  | 400 | 123 |
| 324 | $\text{CuNi}(\text{CN})_4$                                                         | tetragonal   | -9.7   | 473 | 124 |
| 325 | $\text{CdPt}(\text{CN})_6$                                                         | cubic        | -30.1  | 240 | 125 |
| 326 | $\text{MnPt}(\text{CN})_6$                                                         | cubic        | -19.7  | 300 | 125 |
| 327 | $\text{FePt}(\text{CN})_6$                                                         | cubic        | -12.0  | 315 | 125 |
| 328 | $\text{ZnPt}(\text{CN})_6$                                                         | cubic        | -10.6  | 400 | 125 |
| 329 | $\text{CoPt}(\text{CN})_6$                                                         | cubic        | -4.8   | 350 | 125 |
| 330 | $\text{NiPt}(\text{CN})_6$                                                         | cubic        | -3.1   | 330 | 125 |
| 331 | $\text{CuPt}(\text{CN})_6$                                                         | tetragonal   | -4.7   | 400 | 125 |
| 332 | $\text{FeFe}(\text{CN})_6$                                                         | cubic        | -12.8  | 450 | 126 |
| 333 | $\text{GaFe}(\text{CN})_6$                                                         | cubic        | -12.0  | 475 | 127 |
| 334 | $\text{FeCo}(\text{CN})_6$                                                         | cubic        | -4.4   | 300 | 128 |
| 335 | $\text{YFe}(\text{CN})_6$                                                          | cubic        | -33.7  | 575 | 129 |
| 336 | $\text{Y}(\text{Fe}(\text{CN})_6)(\text{H}_2\text{O})_4$                           | orthorhombic | 13.1   | 300 | 129 |
| 337 | $\text{K Y Fe}(\text{CN})_6(\text{H}_2\text{O})_3$                                 | orthorhombic | 42.7   | 300 | 129 |
| 338 | $\text{K Y Fe}(\text{CN})_6$                                                       | trigonal     | 20.3   | 300 | 129 |
| 339 | $\text{K La Fe}(\text{CN})_6$                                                      | trigonal     | 50.0   | 300 | 130 |
| 340 | $\text{K La}(\text{Fe}(\text{CN})_6)(\text{H}_2\text{O})_4$                        | hexagonal    | 55.8   | 300 | 131 |
| 341 | $\text{La}(\text{Co}(\text{CN})_6)(\text{H}_2\text{O})_5$                          | hexagonal    | 44.5   | 300 | 131 |
| 342 | $\text{LaFe}(\text{CN})_6$                                                         | hexagonal    | -50.0  | 150 | 130 |
| 343 | $\text{SmFe}(\text{CN})_6$                                                         | hexagonal    | -40.0  | 525 | 132 |
| 344 | $\text{LuFe}(\text{CN})_6$                                                         | hexagonal    | -30.0  | 525 | 132 |
| 345 | $\text{HoFe}(\text{CN})_6$                                                         | hexagonal    | -35.0  | 525 | 133 |
| 346 | $\text{LuCo}(\text{CN})_6$                                                         | hexagonal    | -27.2  | 500 | 133 |
| 347 | $\text{LaCo}(\text{CN})_6$                                                         | hexagonal    | -44.1  | 500 | 133 |
| 348 | $\text{PrCo}(\text{CN})_6$                                                         | hexagonal    | -27.2  | 500 | 133 |
| 349 | $\text{SmCo}(\text{CN})_6$                                                         | hexagonal    | -37.2  | 500 | 133 |
| 350 | $\text{HoCo}(\text{CN})_6$                                                         | hexagonal    | -30.0  | 500 | 133 |
| 351 | $\text{YCo}(\text{CN})_6$                                                          | hexagonal    | -31.5  | 500 | 133 |
| 352 | $\text{ScCo}(\text{CN})_6$                                                         | cubic        | -19.8  | 600 | 134 |
| 353 | $\text{ErCo}(\text{CN})_6$                                                         | hexagonal    | -27.0  | 375 | 135 |
| 354 | $\text{Er}(\text{Co}(\text{CN})_6)(\text{H}_2\text{O})_4$                          | orthorhombic | 11.0   | 300 | 135 |
| 355 | $\text{Ni}_2\text{W}(\text{CN})_8$                                                 | tetragonal   | -24.6  | 260 | 136 |
| 356 | $(\text{Ni}(\text{H}_2\text{O})_2)_2(\text{W}(\text{CN})_8)(\text{H}_2\text{O})_4$ | tetragonal   | 35.4   | 300 | 136 |
| 357 | $\text{Co}_3(\text{Co}(\text{CN})_6)_2(\text{H}_2\text{O})_{12}$                   | cubic        | -119.1 | 298 | 137 |
| 358 | $\text{Ni}_3(\text{Co}(\text{CN})_6)_2(\text{H}_2\text{O})_{12}$                   | cubic        | -90.0  | 298 | 137 |
| 359 | $\text{Zn}_3(\text{Co}(\text{CN})_6)_2(\text{H}_2\text{O})_9$                      | cubic        | -89.1  | 298 | 137 |
| 360 | $\text{Mn}_3(\text{Co}(\text{CN})_6)_2(\text{H}_2\text{O})_{12}$                   | cubic        | -87.6  | 298 | 137 |
| 361 | $\text{Cu}_3(\text{Co}(\text{CN})_6)_2(\text{H}_2\text{O})_{12}$                   | cubic        | -60.0  | 298 | 137 |

|     |                                                                       |              |        |      |     |
|-----|-----------------------------------------------------------------------|--------------|--------|------|-----|
| 362 | $\text{Fe}_3 (\text{Co} (\text{C N})_6)_2 (\text{H}_2 \text{O})_{12}$ | cubic        | -58.8  | 298  | 137 |
| 363 | $\text{Zn}_3 (\text{Fe} (\text{C N})_6)_2 (\text{H}_2 \text{O})_{14}$ | cubic        | -39.6  | 298  | 137 |
| 364 | $\text{Zn}_2 (\text{Fe} (\text{C N})_6) (\text{H}_2 \text{O})_5$      | trigonal     | 129.3  | 300  | 137 |
| 365 | $\text{Cu}_3 (\text{Fe} (\text{C N})_6)_2 (\text{H}_2 \text{O})_{14}$ | cubic        | -118.8 | 298  | 137 |
| 366 | $\text{Cu}_2 (\text{Fe} (\text{C N})_6)_2 (\text{H}_2 \text{O})_{16}$ | cubic        | 60.3   | 300  | 137 |
| 367 | $\text{Fe}_3 (\text{Fe} (\text{C N})_6)_2 (\text{H}_2 \text{O})_{14}$ | cubic        | -29.7  | 298  | 137 |
| 368 | $\text{Mn}_3 (\text{Fe} (\text{C N})_6)_2 (\text{H}_2 \text{O})_{14}$ | cubic        | 143.4  | 300  | 137 |
| 369 | $\text{Mn}_2 (\text{Fe} (\text{C N})_6) (\text{H}_2 \text{O})_9$      | monoclinic   | 60.6   | 300  | 137 |
| 370 | $\text{Co}_3 (\text{Fe} (\text{C N})_6)_2 (\text{H}_2 \text{O})_{17}$ | cubic        | 23.7   | 300  | 137 |
| 371 | $\text{Co}_2 (\text{Fe} (\text{C N})_6)_2 (\text{H}_2 \text{O})_{18}$ | cubic        | 58.5   | 300  | 137 |
| 372 | $\text{Ni}_3 (\text{Fe} (\text{C N})_6)_2 (\text{H}_2 \text{O})_{14}$ | cubic        | 17.7   | 300  | 137 |
| 373 | $\text{Ni}_2 (\text{Fe} (\text{C N})_6)_2 (\text{H}_2 \text{O})_{18}$ | cubic        | 59.7   | 300  | 137 |
| 374 | $\text{Hg} (\text{C N})_2$                                            | tetragonal   | 116.9  | 300  | 138 |
| 375 | $\text{Hg C N} (\text{N O}_3)$                                        | hexagonal    | 29.2   | 300  | 138 |
| 376 | $\text{Zn} (\text{Au} (\text{C N})_2)_2$                              | hexagonal    | 15.1   | 300  | 139 |
| 377 | $\text{Zn} (\text{Ag} (\text{C N})_2)_2 (\text{Ag C N})_{0.57}$       | hexagonal    | -13.6  | 375  | 139 |
| 378 | $\text{K Mn} (\text{Ag} (\text{C N})_2)_3$                            | trigonal     | 61.0   | 300  | 140 |
| 379 | $\text{KNiAu}_3 (\text{CN})_6$                                        | trigonal     | 62.0   | 300  | 141 |
| 380 | $\text{KCd} (\text{Ag} (\text{CN})_2)_3$                              | hexagonal    | 85.0   | 300  | 142 |
| 381 | $\text{KCd} (\text{Au} (\text{CN})_2)_3$                              | hexagonal    | 89.7   | 395  | 142 |
| 382 | $(\text{Zn}_{0.8} \text{Cd}_{0.2}) (\text{C N})_2$                    | cubic        | -17.8  | 375  | 143 |
| 383 | $\text{Cd} (\text{N H}_3)_2 (\text{Cd} (\text{C N})_4)$               | tetragonal   | 20.3   | 300  | 144 |
| 384 | $\text{Ni} (\text{C N})_2 (\text{H}_2 \text{O})_{1.5}$                | orthorhombic | 48.5   | 300  | 145 |
| 385 | $\text{Ag}_3 (\text{Co} (\text{CN})_6)$                               | trigonal     | 20.5   | 300  | 146 |
| 386 | $\text{CuSCN}$                                                        | hexagonal    | 19.9   | 300  | 147 |
| 387 | $\text{AgC}_4\text{N}_3$                                              | orthorhombic | 98.0   | 300  | 148 |
| 388 | $\text{KCN}$                                                          | monoclinic   | 133.0  | 300  | 149 |
| 389 | $\text{NaCN}$                                                         | orthorhombic | 53.0   | 300  | 150 |
| 390 | $\text{FePd} (\text{CN})_4$                                           | orthorhombic | 83.1   | 500  | 151 |
| 391 | $\text{NbO}_2\text{F}$                                                | tetragonal   | -5.0   | 500  | 152 |
| 392 | $\text{TaO}_2\text{F}$                                                | tetragonal   | -0.6   | 400  | 153 |
| 393 | $\text{ScF}_3$                                                        | cubic        | -42.0  | 110  | 154 |
| 394 | $\text{ZnF}_2$                                                        | tetragonal   | -2.0   | 63   | 155 |
| 395 | $\text{CoZrF}_6$                                                      | cubic        | 10.0   | 300  | 156 |
| 396 | $\text{MgZrF}_6$                                                      | cubic        | -22.5  | 300  | 157 |
| 397 | $\text{CaHfF}_6$                                                      | cubic        | -72.0  | 1000 | 157 |
| 398 | $\text{Mg}_{0.5} \text{Zr}_{1.5} \text{F}_7$                          | cubic        | -5.0   | 125  | 158 |
| 399 | $\text{LuZrF}_7$                                                      | cubic        | -5.0   | 200  | 159 |
| 400 | $\text{YbZrF}_7$                                                      | cubic        | -6.0   | 250  | 160 |
| 401 | $\text{SrZrF}_6$                                                      | cubic        | -40.0  | 300  | 161 |
| 402 | $\text{CaZrF}_6$                                                      | cubic        | -60.0  | 675  | 161 |
| 403 | $\text{MnZrF}_6$                                                      | cubic        | -13.4  | 675  | 156 |
| 404 | $\text{FeZrF}_6$                                                      | cubic        | -9.7   | 675  | 156 |
| 405 | $\text{NiZrF}_6$                                                      | cubic        | 54.7   | 300  | 156 |

|     |                                                                          |              |       |     |     |
|-----|--------------------------------------------------------------------------|--------------|-------|-----|-----|
| 406 | CaNbF <sub>6</sub>                                                       | cubic        | -65.0 | 300 | 162 |
| 407 | MgNbF <sub>6</sub>                                                       | cubic        | 150.0 | 300 | 162 |
| 408 | NaSbF <sub>6</sub>                                                       | cubic        | 62.0  | 300 | 163 |
| 409 | NaNbF <sub>6</sub>                                                       | cubic        | -1.0  | 250 | 164 |
| 410 | CaTiF <sub>6</sub>                                                       | cubic        | -42.0 | 500 | 165 |
| 411 | AlF <sub>3</sub>                                                         | trigonal     | 86.0  | 300 | 166 |
| 412 | (Sc <sub>0.95</sub> Ga <sub>0.05</sub> )F <sub>3</sub>                   | cubic        | -7.2  | 900 | 167 |
| 413 | (Sc <sub>0.9</sub> Ga <sub>0.05</sub> Fe <sub>0.05</sub> )F <sub>3</sub> | cubic        | -3.9  | 900 | 167 |
| 414 | (Sc <sub>0.8</sub> Ga <sub>0.05</sub> Fe <sub>0.15</sub> )F <sub>3</sub> | cubic        | 9.9   | 300 | 167 |
| 415 | (Sc <sub>0.85</sub> Ga <sub>0.05</sub> Fe <sub>0.1</sub> )F <sub>3</sub> | cubic        | 6.9   | 300 | 167 |
| 416 | GaN                                                                      | hexagonal    | -0.7  | 50  | 168 |
| 417 | AlN                                                                      | hexagonal    | -0.3  | 50  | 168 |
| 418 | InN                                                                      | hexagonal    | -0.5  | 50  | 168 |
| 419 | CrI <sub>3</sub>                                                         | trigonal     | -5.6  | 300 | 169 |
| 420 | FeSi <sub>2</sub>                                                        | orthorhombic | 16.8  | 300 | 170 |
| 421 | GaAs                                                                     | cubic        | -1.7  | 150 | 171 |
| 422 | ZnS                                                                      | cubic        | -3.2  | 30  | 172 |
| 423 | SrAu <sub>3</sub> Ge                                                     | tetragonal   | 27.5  | 300 | 173 |
| 424 | Cu <sub>0.66</sub> Zn <sub>0.34</sub>                                    | cubic        | 17.5  | 300 | 174 |
| 425 | (Cu <sub>0.85</sub> Sn <sub>0.15</sub> )                                 | cubic        | 17.3  | 300 | 174 |
| 426 | Fe <sub>0.5</sub> Ni <sub>0.5</sub>                                      | cubic        | 9.9   | 300 | 174 |
| 427 | Zn(N(CN) <sub>2</sub> ) <sub>2</sub>                                     | orthorhombic | 20.2  | 300 | 175 |
| 428 | Si(CN <sub>2</sub> ) <sub>2</sub>                                        | cubic        | -3.7  | 500 | 176 |
| 429 | LiSr <sub>2</sub> Br <sub>3</sub> (CN <sub>2</sub> )                     | cubic        | -3.0  | 30  | 177 |
| 430 | MoS <sub>2</sub>                                                         | hexagonal    | -1.0  | 200 | 178 |
| 431 | YbAl <sub>3</sub>                                                        | cubic        | -0.3  | 25  | 179 |
| 432 | Cu <sub>3</sub> N                                                        | cubic        | -4.0  | 50  | 180 |
| 433 | Li <sub>3</sub> N                                                        | cubic        | -20.0 | 300 | 181 |
| 434 | PdZrGe                                                                   | orthorhombic | -2.0  | 900 | 182 |

## References

1. J. S. O. Evans and T. A. Mary, *International Journal of Inorganic Materials*, 2000, **2**, 143-151.
2. Z. P. Zhang, W. K. Sun, H. F. Liu, B. T. Xiao, X. H. Zeng and X. B. Chen, *Journal of Alloys and Compounds*, 2019, **783**, 77-83.
3. D. X. Chen, B. H. Yuan, H. L. Yuan, X. H. Ge, J. Guo, E. J. Liang and M. J. Chao, *Ceramics International*, 2018, **44**, 9609-9615.
4. S. Sumithra and A. M. Umarji, *Solid State Sciences*, 2006, **8**, 1453-1458.
5. G. Zeng, H. Yuan, J. Guo, X. Liu, M. Chao and E. Liang, *Journal of Solid State Chemistry*, 2022, **314**, 123339.
6. X. H. Ge, Y. C. Mao, L. Li, L. P. Li, N. Yuan, Y. G. Cheng, J. Guo, M. J. Chao and E. J. Liang, *Chinese Physics Letters*, 2016, **33**.
7. X. H. Ge, Y. C. Mao, X. S. Liu, Y. G. Cheng, B. H. Yuan, M. J. Chao and E. J. Liang, *Scientific Reports*, 2016, **6**.
8. M. Cetinkol, A. P. Wilkinson and P. L. Lee, *Journal of Solid State Chemistry*, 2009, **182**, 1304-

- 1311.
9. J. S. O. Evans, T. A. Mary and A. W. Sleight, *Journal of Solid State Chemistry*, 1998, **137**, 148-160.
  10. P. M. Forster, A. Yokochi and A. W. Sleight, *Journal of Solid State Chemistry*, 1998, **140**, 157-158.
  11. D. A. Woodcock, P. Lightfoot and C. Ritter, *Journal of Solid State Chemistry*, 2000, **149**, 92-98.
  12. X. H. Ge, X. S. Liu, Y. G. Cheng, B. H. Yuan, D. X. Chen, M. J. Chao, J. Guo, J. Q. Wang and E. J. Liang, *Journal of Applied Physics*, 2016, **120**.
  13. M. Cetinkol and A. P. Wilkinson, *Solid State Communications*, 2009, **149**, 421-424.
  14. H. L. Yuan, C. Y. Wang, Q. L. Gao, G. J. Zeng, J. Guo, M. J. Chao, S. Kawaguchi, Y. Jia and E. J. Liang, *Materials Horizons*, 2021, **8**, 2562-2568.
  15. M. Ari, P. M. Jardim, B. A. Marinkovic, F. Rizzo and F. F. Ferreira, *Journal of Solid State Chemistry*, 2008, **181**, 1472-1479.
  16. Q. J. Li, B. H. Yuan, W. B. Song, E. J. Liang and B. Yuan, *Chinese Physics B*, 2012, **21**.
  17. B. A. Marinkovic, M. Ari, P. M. Jardim, R. R. de Avillez, F. Rizzo and F. F. Ferreira, *Thermochimica Acta*, 2010, **499**, 48-53.
  18. Y. G. Cheng, Y. Liang, X. H. Ge, X. S. Liu, B. H. Yuan, J. Guo, M. J. Chao and E. Liang, *Rsc Advances*, 2016, **6**, 53657-53661.
  19. Y. Cheng, Y. Liang, Y. Mao, X. Ge, B. Yuan, J. Guo, M. chao and E. Liang, *Materials Research Bulletin*, 2017, **85**, 176-180.
  20. Y. Yan-Min, L. Liang-Chao and F. Mei, *Chinese Journal of Inorganic Chemistry*, 2007, **23**, 382-386.
  21. S. Sumithra and A. M. Umarji, *Solid State Sciences*, 2004, **6**, 1313-1319.
  22. H. F. Liu, Z. P. Zhang, J. Ma, Z. Jun and X. H. Zeng, *Ceramics International*, 2015, **41**, 9873-9877.
  23. S. Sumithra, A. K. Tyagi and A. M. Umarji, *Materials Science and Engineering B-Solid State Materials for Advanced Technology*, 2005, **116**, 14-18.
  24. S. L. Li, X. H. Ge, H. L. Yuan, D. X. Chen, J. Guo, R. F. Shen, M. J. Chao and E. J. Liang, *Frontiers in Chemistry*, 2018, **6**.
  25. T. Li, X. H. Ge, X. S. Liu, Y. G. Cheng, Y. M. Liu, H. L. Yuan, S. L. Li, Y. Y. Liu, J. Guo, Q. Sun, Y. X. Li and E. J. Liang, *Materials Express*, 2016, **6**, 515-520.
  26. Kimberly, J., Miller, Carl, P., Romao, Mario, Bieringer, Bojan and A., *Journal of the American Ceramic Society*, 2012.
  27. S. Wei, Zhengzhou University, 2018.
  28. J. Peng, M. M. Wu, H. Wang, Y. M. Hao, Z. Hu, Z. X. Yu, D. F. Chen, R. Kiyanaigic, J. S. Fieramosca, S. Short and J. Jorgensen, *Journal of Alloys and Compounds*, 2008, **453**, 49-54.
  29. X. Z. Liu, L. J. Hao, M. M. Wu, X. B. Ma, D. F. Chen and Y. T. Liu, *Materials Research Bulletin*, 2015, **70**, 640-644.
  30. H. L. Yuan, C. Y. Wang, Q. L. Gao, X. H. Ge, H. Sun, S. H. Lapidus, J. Guo, M. J. Chao, Y. Jia and E. J. Liang, *Inorganic Chemistry*, 2020, **59**, 4090-4095.
  31. M. M. Wu, J. Peng, Y. Z. Cheng, H. Wang, Z. X. Yu, D. F. Chen and Z. B. Hu, *Solid State Sciences*, 2006, **8**, 665-670.
  32. R. Uehara, S. Matsushita, A. Nakajima and T. Isobe, *Journal of Asian Ceramic Societies*, 2021, **9**, 1194-1203.
  33. Z. Zhang, Y. Wang, Y. Lei, F. Zhang, X. Chen and H. Liu, *Journal of Materials Research and Technology*, 2022, **18**, 1643-1652.
  34. R Roy, a. D K Agrawal and H. A. McKinstry, *Annual Review of Materials Science*, 1989, **19**, 59-81.
  35. M. K. Gupta, R. Mittal, S. L. Chaplot and S. Rols, *Journal of Applied Physics*, 2014, **115**.
  36. D. J. Fisher, in *Negative Thermal Expansion Materials*, 2018, vol. 22, pp. 1-156.
  37. M. T. Dove and H. Fang, *Reports on Progress in Physics*, 2016, **79**.
  38. J. P. Wang, Q. D. Chen, S. L. Li, Y. J. Ji, G. J. Zeng, Y. W. Liu and E. J. Liang, *Solid State Communications*, 2019, **287**, 7-12.
  39. Y. Yamamura, A. Horikoshi, S. Yasuzuka, H. Saitoh and K. Saito, *Dalton Transactions*, 2011, **40**, 2242-2248.
  40. G. Wallez, P. Karin, D. Bregiroux, B. Denis, D. Nicolas, C. Nicolas, K. Rudy, F. Andrew, L. Delevoye and A. Christos, 2012.

41. K. M. White, P. L. Lee, P. J. Chupas, K. W. Chapman, E. A. Payzant, A. C. Jupe, W. A. Bassett, C. S. Zha and A. P. Wilkinson, *Chemistry of Materials*, 2008, **20**, 3728-3734.
42. M. Sato, V. Warne-Lang, Y. Kadowaki, N. Katayama, Y. Okamoto and K. Takenaka, *Aip Advances*, 2020, **10**.
43. H. Wang, M. J. Yang, M. J. Chao, J. Guo, Q. L. Gao, Y. J. Jiao, X. B. Tang and E. J. Liang, *Solid State Ionics*, 2019, **343**.
44. G. Wallez, S. Launay, M. Quarton, N. Dacheux and J. L. Soubeyroux, *Journal of Solid State Chemistry*, 2004, **177**, 3575-3580.
45. T. G. Amos and A. W. Sleight, *Journal of Solid State Chemistry*, 2001, **160**, 230-238.
46. M. Gogolin, M. M. Murshed, M. Ende, R. Miletich and T. M. Gesing, *Journal of Materials Science*, 2020, **55**, 177-190.
47. S. Bevara, B. Rajeswari, S. J. Patwe, P. S. R. Krishna, A. B. Shinde, S. N. Achary, R. M. Kadam and A. K. Tyagi, *Journal of Alloys and Compounds*, 2019, **783**, 310-320.
48. C. Ablitt, H. McGay, S. Craddock, L. Cooper, E. Reynolds, A. A. Mostofi, N. C. Bristowe, C. A. Murray and M. S. Senn, *Chemistry of Materials*, 2020, **32**, 605-610.
49. W. T. Chen, C. Ablitt, N. C. Bristowe, A. A. Mostofi, T. Saito, Y. Shimakawa and M. S. Senn, *Chemical Communications*, 2019, **55**, 2984-2987.
50. K. Oikawa, T. Kamiyama, T. Hashimoto, Y. Shimojyo and Y. Morii, *Journal of Solid State Chemistry*, 2000, **154**, 524-529.
51. S. V. Krivovichev, S. K. Filatov and P. C. Burns, *Canadian Mineralogist*, 2002, **40**, 1185-1190.
52. C. Tenailleau, E. Suard, J. Rodriguez-Carvajal, A. Gibaud and P. Lacorre, *Journal of Solid State Chemistry*, 2003, **174**, 431-440.
53. L. R. Araujo, L. C. Gallington, A. P. Wilkinson and J. S. O. Evans, *Journal of Solid State Chemistry*, 2018, **258**, 885-893.
54. S. Allen, N. R. Warmingham, R. K. B. Gover and J. S. O. Evans, *Chemistry of Materials*, 2003, **15**, 3406-3410.
55. H. Wei, M. Hasegawa, S. Mizutani, A. Aimi, K. Fujimoto and K. Nishio, *Materials*, 2018, **11**.
56. G. J. Redhammer and G. Roth, *Journal of Solid State Chemistry*, 2004, **177**, 2714-2725.
57. S. N. Achary, K. R. Chakraborty, S. J. Patwe, A. B. Shinde, P. S. R. Krishna and A. K. Tyagi, *Materials Research Bulletin*, 2006, **41**, 674-682.
58. X. B. Deng, J. Z. Tao, X. J. Yang, H. Ma, J. W. Richardson and X. H. Zhao, *Chemistry of Materials*, 2008, **20**, 1733-1740.
59. Q. Q. Liu, J. Yang, X. J. Sun and X. N. Cheng, *Physica Status Solidi B-Basic Solid State Physics*, 2008, **245**, 2477-2482.
60. G. D. Gatta, M. Merlini, P. Lotti, A. Lausi and M. Rieder, *Microporous and Mesoporous Materials*, 2012, **163**, 147-152.
61. S. E. Tallentire, F. Child, I. Fall, L. Vella-Zarb, I. R. Evans, M. G. Tucker, D. A. Keen, C. Wilson and J. S. O. Evans, *Journal of the American Chemical Society*, 2013, **135**, 12849-12856.
62. B. Ranjbar and B. J. Kennedy, *Journal of Solid State Chemistry*, 2015, **232**, 178-181.
63. X. Chen, F. L. Guo, X. B. Deng, J. Z. Tao, D. L. Qiu and X. H. Zhao, *Journal of Alloys and Compounds*, 2014, **612**, 252-258.
64. B. Ranjbar and B. J. Kennedy, *Solid State Sciences*, 2015, **49**, 43-46.
65. E. Reynolds, Z. M. Zhang, M. Avdeev, G. J. Thorogood, F. Poineau, K. R. Czerwinski, J. A. Kimpton and B. J. Kennedy, *Inorganic Chemistry*, 2017, **56**, 9219-9224.
66. J. S. O. Evans, T. A. Mary, T. Vogt, M. A. Subramanian and A. W. Sleight, *Chemistry of Materials*, 1996, **8**, 2809-2823.
67. L. A. Villaescusa, P. Lightfoot, S. J. Teat and R. E. Morris, *Journal of the American Chemical Society*, 2001, **123**, 5453-5459.
68. I. Bull, P. Lightfoot, L. A. Villaescusa, L. M. Bull, R. K. B. Gover, J. S. O. Evans and R. E. Morris, *Journal of the American Chemical Society*, 2003, **125**, 4342-4349.
69. S. K. Filatov, Y. P. Biryukov, R. S. Bubnova and A. P. Shablinskii, *Acta Crystallographica Section B-Structural Science Crystal Engineering and Materials*, 2019, **75**, 697-703.
70. P. F. Gong, X. X. Jiang, Y. Yang, S. Y. Luo, R. J. Huang, L. F. Li, C. T. Chen and Z. S. Lin, *Inorganic Chemistry*, 2016, **55**, 5113-5115.
71. I. V. Korniyakov, V. V. Gurzhiy, J. E. S. Szymanowski, L. Zhang, S. N. Perry, S. V. Krivovichev and P. C. Burns, *Crystal Growth & Design*, 2019, **19**, 2811-2819.

72. J. Peng, H. Wang, Z. X. Yu, D. F. Chen and Z. Hu, *Materials Chemistry and Physics*, 2007, **104**, 68-73.
73. Y. Yamamura, N. Nakajima and T. Tsuji, *Physical Review B*, 2001, **64**.
74. C. A. Kennedy, M. A. White, A. P. Wilkinson and T. Varga, *Applied Physics Letters*, 2007, **90**.
75. P. S. Sokolov, A. N. Baranov, A. M. T. Bell and V. L. Solozhenko, *Solid State Communications*, 2014, **177**, 65-67.
76. L. Leardini, S. Quartieri, G. Vezzalini and R. Arletti, *Microporous and Mesoporous Materials*, 2015, **202**, 226-233.
77. D. Santamaria-Perez, T. Marqueno, S. MacLeod, J. Ruiz-Fuertes, D. Daisenberger, R. Chulia-Jordan, D. Errandonea, J. L. Jorda, F. Rey, C. McGuire, A. Mahkluf, A. Kavner and C. Popescu, *Chemistry of Materials*, 2017, **29**, 4502-4510.
78. D. H. Chang, W. Y. Yu, Q. Sun and Y. Jia, *Physical Chemistry Chemical Physics*, 2017, **19**, 2067-2072.
79. H. SCHULZ, *Journal of the American Ceramic Society*, 1974, **57**, 313-318.
80. H. L. Yuan, Q. L. Gao, P. Xu, J. Guo, L. H. He, A. Sanson, M. J. Chao and E. J. Liang, *Inorganic Chemistry*, 2021, **60**, 1499-1505.
81. Y. G. Hao, H. L. Xie, G. J. Zeng, H. L. Yuan, Y. M. Hu, J. Guo, Q. L. Gao, M. J. Chao, X. Ren and E. J. Liang, *Chinese Physics B*, 2022, **31**.
82. N. Shi, A. Sanson, Q. L. Gao, Q. Sun, Y. Ren, Q. Z. Huang, D. O. de Souza, X. R. Xing and J. Chen, *Journal of the American Chemical Society*, 2020, **142**, 3088-3093.
83. N. K. Shi, A. Sanson, A. Venier, L. L. Fan, Y. Ren, D. O. de Souza, L. Olivi, Y. Z. Song, X. R. Xing and J. Chen, *Scripta Materialia*, 2022, **207**.
84. M. Wildner, B. A. Zakharov, N. E. Bogdanov, D. Talla, E. V. Boldyreva and R. Miletich, *Iucrj*, 2022, **9**, 194-203.
85. Z. Y. Yao, G. Q. Zhang, W. W. Yao, X. Z. Wang, Y. Qian and X. M. Ren, *Dalton Transactions*, 2020, **49**, 10638-10644.
86. J. Z. Tao and A. W. Sleight, *Journal of Physics and Chemistry of Solids*, 2003, **64**, 1473-1479.
87. A. Doi, S. Shimano, T. Matsunaga, Y. Tokura and Y. Taguchi, *Applied Physics Express*, 2021, **14**.
88. X. Y. Zhang, X. X. Jiang, M. S. Molokeev, N. Z. Wang, Y. Q. Liu and Z. S. Lin, *Chemistry of Materials*, 2022, **34**, 4195-4201.
89. M. K. Gupta, R. Mittal, B. Singh, S. K. Mishra, D. T. Adroja, A. D. Fortes and S. L. Chaplot, *Physical Review B*, 2018, **98**.
90. J. T. Schick, A. M. Gopakumar and A. M. Rappe, 2017.
91. G. Chu, X. J. Zhai, Y. Fu, Z. J. Lu and S. W. Bi, *Journal of Inorganic Materials*, 2005, **20**, 755-758.
92. K. Sen, R. Heid, S. M. Souliou, D. Boll, A. Bosak, N. H. Sung, J. Bertinshaw, H. Gretarsson, B. J. Kim, F. Weber and M. Le Tacon, *Physical Review B*, 2022, **105**.
93. R. Mittal, S. Kumar, M. K. Gupta, S. K. Mishra, S. Mukhopadhyay, M. D. Le, R. Shukla, S. N. Achary, A. K. Tyagi and S. L. Chaplot, *Materials Advances*, 2022, **3**, 2104-2116.
94. F. Zerarga, D. Allali, A. Bouhemadou, R. Khenata, B. Deghfel, S. S. Essaoud, R. Ahmed, Y. Al-Douri, S. S. Safaai, S. Bin-Omran and S. H. Naqib, *Computational Condensed Matter*, 2022, **32**.
95. N. Zhang, J. H. Li, X. S. Kong, M. T. She, P. Guo, J. J. Sun, P. L. Yuan, S. P. Zang, M. J. Chao and E. J. Liang, *Journal of Materials Research and Technology-Jmr&T*, 2022, **18**, 3841-3848.
96. I. D. Peggs.
97. D. C. Larsen.
98. R. S. Krishnan, R. Srinivasan and S. Devanarayanan.
99. S. Chen, X. Zhou, W. J. Song, J. B. Sun, H. Zhang, J. N. Jiang, L. H. Deng, S. J. Dong and X. Q. Cao, *Journal of the European Ceramic Society*, 2019, **39**, 2397-2408.
100. R. L. Tang, C. L. Hu, J. H. Feng, Z. Fang, Y. Chen, F. Kong and J. G. Mao, *Dalton Transactions*, 2020, **49**, 3743-3749.
101. M. J. Yang, S. Wei, S. L. Su, M. J. Chao, J. Guo, H. Wang, X. B. Tang, Y. J. Jiao and E. J. Liang, *Ceramics International*, 2020, **46**, 10250-10255.
102. V. Kahlenberg, D. Girtler, E. Arroyabe, R. Kaindl and D. M. Tobbens, *Mineralogy and Petrology*, 2010, **100**, 1-9.
103. O. Tougaard and J. A. Ibers, *Journal of Solid State Chemistry*, 2001, **157**, 289-295.

104. M. Weil, *Acta Crystallographica Section E-Crystallographic Communications*, 2018, **74**, 1006-+.
105. Z. J. Liu, X. W. Sun, X. M. Tan, Y. D. Guo and X. D. Yang, *Solid State Communications*, 2007, **144**, 264-268.
106. I. J. Kim and H. C. Kim, *Journal of Ceramic Processing Research*, 2004, **5**, 308-312.
107. W. B. Simmons and D. R. Peacor.
108. M. Tribaudino, G. L. Hovis, C. Almer and A. Leaman, *American Mineralogist*, 2022, **107**, 1302-1312.
109. H. Yang, R. M. Hazen, R. T. Downs and L. W. Finger.
110. L. Peters, K. Knorr, M. Knapp and W. Depmeier.
111. M. Takeda, T. Onishi, S. Nakakubo and S. Fujimoto, *Materials Transactions*, 2009, **50**, 2242-2246.
112. P. B. Moore and T. Araki.
113. L. Li, D. J. Weidner, J. Brodholt, D. Alfe and G. D. Price, *Journal of Earth Science*, 2011, **22**, 169-175.
114. P. A. Northrup, K. Leinenweber and J. B. Parise.
115. E. S. Smirnova, O. A. Alekseeva, A. P. Dudka, T. A. Sorokin, D. N. Khmelenin, V. O. Yapaskurt, M. V. Lyubutina, K. V. Frolov, I. S. Lyubutin and I. A. Gudim, *Acta Crystallographica Section B-Structural Science Crystal Engineering and Materials*, 2022, **78**, 546-556.
116. Y. G. Denisenko, V. V. Atuchin, M. S. Molokeyev, A. E. Sedykh, N. A. Khritokhin, A. S. Aleksandrovsky, A. S. Oreshonkov, N. P. Shestakov, S. V. Adichtchev, A. M. Pugachev, E. I. Sal'nikova, O. V. Andreev, I. A. Razumkova and K. Muller-Buschbaum, *Molecules*, 2022, **27**.
117. C. Thieme and C. Russel, *Dalton Transactions*, 2016, **45**, 4888-4895.
118. L. Hu, Y. C. Zhu, Y. W. Fang, M. Fukuda, T. Nishikubo, Z. Pan, Y. Sakai, S. Kawaguchi, H. Das, A. Machida, T. Watanuki, S. Mori, K. Takenaka and M. Azuma, *Chemistry of Materials*, 2021, **33**, 7665-7674.
119. S. J. Hibble, G. B. Wood, E. J. Bilbe, A. H. Pohl, M. G. Tucker, A. C. Hannon and A. M. Chippindale, *Zeitschrift Fur Kristallographie-Crystalline Materials*, 2010, **225**, 457-462.
120. A. M. Chippindale, S. J. Hibble, E. J. Bilbé, E. Marelli, A. C. Hannon, C. Allain, R. Pansu and F. Hartl, *Journal of the American Chemical Society*, 2012, **134**, 16387-16400.
121. A. L. Goodwin, K. W. Chapman and C. J. Kepert, *Journal of the American Chemical Society*, 2005, **127**, 17980-17981.
122. Q. L. Gao, J. Q. Wang, A. Sanson, Q. Sun, E. J. Liang, X. R. Xing and J. Chen, *Journal of the American Chemical Society*, 2020, **142**, 6935-6939.
123. S. D'Ambrumenil, M. Zbiri, A. M. Chippindale, S. J. Hibble, E. Marelli and A. C. Hannon, *Physical Review B*, 2019, **99**.
124. S. D'Ambrumeni, M. Zbiri, A. M. Chippindale and S. J. Hibble, *Physical Review B*, 2019, **100**.
125. K. W. Chapman, P. J. Chupas and C. J. Kepert, *Journal of the American Chemical Society*, 2006, **128**, 7009-7014.
126. N. K. Shi, Q. L. Gao, A. Sanson, Q. Li, L. L. Fan, Y. Ren, L. Olivi, J. Chen and X. R. Xing, *Dalton Transactions*, 2019, **48**, 3658-3663.
127. M. Li, Y. Li, C. Y. Wang and Q. Sun, *Chinese Physics Letters*, 2019, **36**.
128. S. Margadonna, K. Prassides and A. N. Fitch, *Journal of the American Chemical Society*, 2004, **126**, 15390-15391.
129. Q. L. Gao, J. Chen, Q. Sun, D. H. Chang, Q. Z. Huang, H. Wu, A. Sanson, R. Milazzo, H. Zhu, Q. Li, Z. N. Liu, J. X. Deng and X. R. Xing, *Angewandte Chemie-International Edition*, 2017, **56**, 9023-9028.
130. D. H. Chang, C. Q. Wang, Z. P. Zeng, C. Y. Wang, F. Wang, Q. Sun and Y. Jia, *Journal of Physical Chemistry C*, 2018, **122**, 12421-12427.
131. S. G. Duyker, G. J. Halder, P. D. Southon, D. J. Price, A. J. Edwards, V. K. Peterson and C. J. Kepert, *Chemical Science*, 2014, **5**, 3409-3417.
132. Q. L. Gao, Q. Sun, A. Venier, A. Sanson, Q. Z. Huang, Y. Jia, E. R. Liang and J. Chen, *Science China-Materials*, 2022, **65**, 553-557.
133. S. G. Duyker, V. K. Peterson, G. J. Kearley, A. J. Ramirez-Cuesta and C. J. Kepert, *Angewandte Chemie-International Edition*, 2013, **52**, 5266-5270.
134. Q. L. Gao, Y. Sun, N. K. Shi, R. Milazzo, S. Pollastri, L. Olivi, Q. Z. Huang, H. Liu, A.

- Sanson, Q. Sun, E. J. Liang, X. R. Xing and J. Chen, *Scripta Materialia*, 2020, **187**, 119-124.
135. T. Pretsch, K. W. Chapman, G. J. Halder and C. J. Kepert, *Chemical Communications*, 2006, DOI: 10.1039/b601344a, 1857-1859.
136. M. Reczynski, S. Chorazy, B. Nowicka, B. Sieklucka and S. Ohkoshi, *Inorganic Chemistry*, 2017, **56**, 179-185.
137. S. Adak, L. L. Daemen, M. Hartl, D. Williams, J. Summerhill and H. Nakotte, *Journal of Solid State Chemistry*, 2011, **184**, 2854-2861.
138. J. L. Korcok and D. B. Leznoff, *Polyhedron*, 2013, **52**, 72-77.
139. A. L. Goodwin, B. J. Kennedy and C. J. Kepert, *Journal of the American Chemical Society*, 2009, **131**, 6334-+.
140. A. B. Cairns, A. L. Thompson, M. G. Tucker, J. Haines and A. L. Goodwin, *Journal of the American Chemical Society*, 2012, **134**, 4454-4456.
141. B. Singh, M. K. Gupta, R. Mittal, M. Zbiri, T. R. Ravindran, H. Schober and S. L. Chaplot, *Journal of Physical Chemistry C*, 2020, **124**, 7216-7228.
142. J. L. Korčok, M. J. Katz and D. B. Leznoff.
143. A. L. Goodwin and C. J. Kepert, *Physical Review B*, 2005, **71**.
144. C. S. Coates, J. W. Makepeace, A. G. Seel, M. Baise, B. Slater and A. L. Goodwin, *Dalton Transactions*, 2018, **47**, 7263-7271.
145. S. J. Hibble, A. M. Chippindale, A. H. Pohl and A. C. Hannon, *Angewandte Chemie-International Edition*, 2007, **46**, 7116-7118.
146. M. Calleja, A. L. Goodwin and M. T. Dove, *Journal of Physics-Condensed Matter*, 2008, **20**.
147. J. Q. Wang, Q. L. Gao, Y. X. Gao, Y. Luo, J. Guo, Q. Sun and E. J. Liang, *Applied Physics Letters*, 2021, **118**.
148. B. Singh, M. K. Gupta, R. Mittal and S. L. Chaplot, *Journal of Physical Chemistry C*, 2018, **122**, 15575-15581.
149. R. B. Von Dreele, J. G. Morgan and S. M. Stishov, *Journal of Experimental and Theoretical Physics*, 1998, **87**, 1188-1190.
150. S. Yamamoto and Y. Shinnaka, *Journal of the Physical Society of Japan*, 1981, **50**, 1417-1418.
151. R. Ohtani, H. Matsunari, T. Yamamoto, K. Kimoto, M. Isobe, K. Fujii, M. Yashima, S. Fujii, A. Kuwabara, Y. Hijikata, S. Noro, M. Ohba, H. Kageyama and S. Hayami, *Angewandte Chemie-International Edition*, 2020, **59**, 19254-19259.
152. A. P. Wilkinson, R. E. Josefsberg, L. C. Gallington, C. R. Morelock and C. M. Monaco, *Journal of Solid State Chemistry*, 2014, **213**, 38-42.
153. J. Z. Tao and A. W. Sleight, *Journal of Solid State Chemistry*, 2003, **173**, 45-48.
154. B. K. Greve, K. L. Martin, P. L. Lee, P. J. Chupas, K. W. Chapman and A. P. Wilkinson, *Journal of the American Chemical Society*, 2010, **132**, 15496-15498.
155. T. Chatterji, M. Zbiri and T. C. Hansen, *Applied Physics Letters*, 2011, **98**.
156. L. Hu, J. Chen, J. L. Xu, N. Wang, F. Han, Y. Ren, Z. Pan, Y. C. Rong, R. J. Huang, J. X. Deng, L. F. Li and X. R. Xing, *Journal of the American Chemical Society*, 2016, **138**, 14530-14533.
157. J. C. Hancock, K. W. Chapman, G. J. Halder, C. R. Morelock, B. S. Karlan, L. C. Gallington, A. Bongiorno, C. Han, S. Zhou and A. P. Wilkinson, *Chemistry of Materials*, 2015, **27**, 3912-3918.
158. S. J. Baxter, B. R. Hester, B. R. Wright and A. P. Wilkinson, *Chemistry of Materials*, 2019, **31**, 3440-3448.
159. A. J. Lloyd and A. P. Wilkinson, *Chemistry of Materials*, 2020, **32**, 9470-9475.
160. J. O. Ticknor, B. R. Hester, J. W. Adkins, W. Q. Xu, A. A. Yakovenko and A. P. Wilkinson, *Chemistry of Materials*, 2018, **30**, 3071-3077.
161. M. K. Gupta, B. Singh, R. Mittal and S. L. Chaplot, *Physical Review B*, 2018, **98**.
162. B. R. Hester, J. C. Hancock, S. H. Lapidus and A. P. Wilkinson, *Chemistry of Materials*, 2017, **29**, 823-831.
163. C. Yang, B. Y. Qu, S. S. Pan, L. Zhang, R. R. Zhang, P. Tong, R. C. Xiao, J. C. Lin, X. G. Guo, K. Zhang, H. Y. Tong, W. J. Lu, Y. Wu, S. Lin, W. H. Song and Y. P. Sun, *Inorganic Chemistry*, 2017, **56**, 4990-4995.
164. A. J. Lloyd, E. B. Masterson, S. J. Baxter, J. J. Molaison, A. M. dos Santos and A. P. Wilkinson, *Inorganic Chemistry*, 2020, **59**, 13979-13987.
165. B. R. Hester and A. P. Wilkinson, *Inorganic Chemistry*, 2018, **57**, 11275-11281.



166. C. R. Morelock, J. C. Hancock and A. P. Wilkinson, *Journal of Solid State Chemistry*, 2014, **219**, 143-147.
167. L. Hu, J. Chen, L. L. Fan, Y. Ren, Y. C. Rong, Z. Pan, J. X. Deng, R. B. Yu and X. R. Xing, *Journal of the American Chemical Society*, 2014, **136**, 13566-13569.
168. M. Swain, S. K. Sahoo and B. K. Sahoo, *Modern Physics Letters B*, 2019, **33**.
169. K. Wang, W. X. Zhou, Y. A. Cheng, M. Zhang, H. Wang and G. Zhang, *Nanoscale*, 2021, **13**, 10882-10890.
170. Y. Terai, H. Ishibashi, Y. Maeda and H. Udono, *Thin Solid Films*, 2004, **461**, 106-109.
171. S. A. Lourenco, I. F. L. Dias, J. L. Duarte, E. Laureto, L. C. Pocas, D. O. T. Filho and J. R. Leite, *Brazilian Journal of Physics*, 2004, **34**, 517-525.
172. L. Wang, P. F. Yuan, F. Wang, Q. Sun, Z. X. Guo, E. J. Liang and Y. Jia, *Materials Chemistry and Physics*, 2014, **148**, 214-222.
173. Q. S. Lin and J. D. Corbett, *Journal of the American Chemical Society*, 2012, **134**, 4877-4884.
174. G. W. C. Kaye and T. H. Laby.
175. Y. Zhang, A. Sanson, Y. Z. Song, L. Olivi, N. K. Shi, L. Wang and J. Chen, *Inorganic Chemistry Frontiers*, 2022, **9**, 2036-2042.
176. P. Kroll, M. Andrade, X. H. Yan, E. Ionescu, G. Mische and R. Riedel, *Journal of Physical Chemistry C*, 2012, **116**, 526-531.
177. M. Lober, M. Strobele, C. P. Romao and H. J. Meyer, *European Journal of Inorganic Chemistry*, 2021, **2021**, 4572-4578.
178. Z. T. Lin, W. G. Liu, S. B. Tian, K. Zhu, Y. Huang and Y. Yang, *Scientific Reports*, 2021, **11**.
179. C. Echevarria-Bonet, M. D. Rodriguez, J. I. Espeso, J. A. B. Rodriguez, I. P. Orench, D. P. Rojas, L. R. Fernandez, F. Fauth and L. F. Barquin, *Ieee Magnetism Letters*, 2019, **10**.
180. M. Birkett, C. N. Savory, A. N. Fioretti, P. Thompson, C. A. Muryn, A. D. Weerakkody, I. Z. Mitrovic, S. Hall, R. Treharne, V. R. Dhanak, D. O. Scanlon, A. Zakutayev and T. D. Veal, *Physical Review B*, 2017, **95**.
181. M. C. Nguyen, K. Hoang, C. Z. Wang and K. M. Ho, *Physical Chemistry Chemical Physics*, 2016, **18**, 4185-4190.
182. B. Anissa, D. Radouan, B. Benaouda and A. Omar, *Chinese Journal of Physics*, 2018, **56**, 2926-2936.
