# Supplementary material for: Exploring negative thermal expansion materials with bulk framework structures and their relevant scaling relationships through multi-step machine learning
Source: Royal Society of Chemistry journal article supplement (doi:10.1039/d3mh01509b), 2024-01-01
Supplement: d3mh01509b3.pdf [file d3mh01509b3.pdf]

Supporting Materials-III

**Searching for Negative Thermal Expansion Materials with Bulk Framework Structures and their Relevant Scaling Relationships through Multi-step Machine Learning**

Yu Cai<sup>a,b</sup>, Chunyan Wang<sup>a,b,c</sup>, Huanli Yuan<sup>c</sup>, Yuan Guo<sup>a,e</sup>, Jun-Hyung Cho<sup>d</sup>, Xianran Xing<sup>e,\*</sup>,  
Yu Jia<sup>\*,a,b,f</sup>

<sup>a</sup> Key Laboratory for Special Functional Materials of Ministry of Education, and School of Materials and Engineering, Henan University, Kaifeng 475001, China

<sup>b</sup> Institute of Quantum Materials and Physics, Henan Academy of Sciences, Zhengzhou 450046, China

<sup>c</sup> School of Physics and Telecommunication Engineering, Zhoukou Normal University, Zhoukou 466001, China

<sup>d</sup>Department of Physics and Research Institute for Natural Science, Hanyang University, 222 Wangsimni-ro, Seongdong-Ku, Seoul 04763, Republic of Korea

<sup>e</sup> Institute of Solid States Chemistry, University of Science and Technology Beijing, Beijing 100083, China

<sup>f</sup> Joint center for Theoretical Physics, and School of Physics and Electronics, Henan University, Kaifeng 475001, China

**Table S1** Negative thermal expansion (NTE) prediction set (Oxides). T2 is the upper temperature limit, and the lower temperature limit is uniformly set as 0K. NTE is set to one decimal place, T2 to an integer.

| No. | Formula                                            | Crystal System | Probability (%) | NTE (ppm/K) | T2(K) |
|-----|----------------------------------------------------|----------------|-----------------|-------------|-------|
| 1   | Ag <sub>2</sub> (MoO <sub>4</sub> ) <sub>3</sub>   | orthorhombic   | 60%             | -2.5        | 724   |
| 2   | Ag <sub>2</sub> IOF                                | monoclinic     | 80%             | -21.5       | 263   |
| 3   | Ag <sub>3</sub> BO <sub>3</sub>                    | trigonal       | 60%             | -5.0        | 256   |
| 4   | Ag <sub>3</sub> CN(ClO <sub>5</sub> ) <sub>2</sub> | monoclinic     | 60%             | -4.1        | 405   |
| 5   | Ag <sub>3</sub> Te(AsO <sub>7</sub> ) <sub>2</sub> | monoclinic     | 60%             | -4.5        | 349   |
| 6   | Ag <sub>4</sub> S(NO) <sub>2</sub>                 | orthorhombic   | 70%             | -16.0       | 353   |
| 7   | AgClO <sub>2</sub>                                 | orthorhombic   | 60%             | -12.9       | 213   |
| 8   | AgClO <sub>3</sub>                                 | cubic          | 60%             | -9.2        | 247   |
| 9   | AgCS(OF) <sub>3</sub>                              | trigonal       | 60%             | -6.4        | 483   |
| 10  | AgI <sub>3</sub> N <sub>2</sub> O                  | orthorhombic   | 60%             | -18.0       | 402   |
| 11  | AgSO <sub>3</sub> F                                | monoclinic     | 90%             | -4.3        | 314   |
| 12  | Al <sub>11</sub> (PO <sub>4</sub> ) <sub>12</sub>  | trigonal       | 80%             | -11.4       | 582   |
| 13  | Al <sub>2</sub> Ga(PO <sub>4</sub> ) <sub>3</sub>  | monoclinic     | 60%             | -6.7        | 528   |

|    |                                                     |              |     |       |      |
|----|-----------------------------------------------------|--------------|-----|-------|------|
| 14 | $\text{Al}_2\text{P}_3\text{O}_{13}$                | monoclinic   | 70% | -4.4  | 537  |
| 15 | $\text{Al}_2\text{PO}_8$                            | orthorhombic | 70% | -2.3  | 467  |
| 16 | $\text{Al}_2\text{Se}_3\text{O}_{28}$               | monoclinic   | 90% | -2.1  | 541  |
| 17 | $\text{Al}_2\text{Si}_3(\text{NO}_5)_2$             | orthorhombic | 80% | -26.5 | 566  |
| 18 | $\text{Al}_4\text{P}_5\text{HN}_2\text{O}_{21}$     | monoclinic   | 60% | -7.9  | 491  |
| 19 | $\text{AlAgO}_2$                                    | orthorhombic | 70% | -1.1  | 481  |
| 20 | $\text{AlGa}(\text{PO}_4)_2$                        | monoclinic   | 70% | -5.4  | 431  |
| 21 | $\text{AlSi}_3\text{O}_8$                           | monoclinic   | 70% | -4.2  | 486  |
| 22 | $\text{AlSi}_5(\text{CO}_6)_2$                      | monoclinic   | 80% | -32.9 | 506  |
| 23 | $\text{As}_2\text{W}_2\text{O}_{11}$                | orthorhombic | 60% | -6.6  | 637  |
| 24 | $\text{AsO}_2$                                      | orthorhombic | 60% | -6.8  | 272  |
| 25 | $\text{AsPHBr}_3\text{OF}_6$                        | orthorhombic | 60% | -18.6 | 543  |
| 26 | $\text{AsPHCl}_3\text{OF}_6$                        | orthorhombic | 70% | -18.5 | 516  |
| 27 | $\text{AsPO}_4$                                     | orthorhombic | 80% | -4.6  | 393  |
| 28 | $\text{AsSClOF}_8$                                  | monoclinic   | 60% | -6.9  | 537  |
| 29 | $\text{AsWO}_5$                                     | monoclinic   | 70% | -11.0 | 518  |
| 30 | $\text{B}_4\text{N}_2\text{O}_{11}$ (Ferrimagnetic) | monoclinic   | 70% | -29.7 | 439  |
| 31 | $\text{B}_4\text{N}_2\text{O}_{11}$ (Non-magnetic)  | monoclinic   | 70% | -7.1  | 467  |
| 32 | $\text{Ba}(\text{SO}_2)_4$                          | orthorhombic | 70% | -5.0  | 1159 |
| 33 | $\text{Ba}_2\text{SnSe}_4\text{O}_5$                | orthorhombic | 60% | -27.0 | 1161 |
| 34 | $\text{BaBr}_2\text{O}$ (Ferromagnetic)             | orthorhombic | 60% | -24.6 | 1186 |
| 35 | $\text{BaBr}_2\text{O}$ (Non-magnetic)              | orthorhombic | 60% | -24.5 | 1162 |
| 36 | $\text{BaI}_2\text{O}$                              | orthorhombic | 60% | -24.1 | 1165 |
| 37 | $\text{BaMo}_2(\text{PO}_4)_3$                      | trigonal     | 80% | -0.7  | 1125 |
| 38 | $\text{BaMo}_4\text{O}_{15}$                        | orthorhombic | 70% | -1.0  | 1139 |
| 39 | $\text{BaNb}_2\text{Fe}_2(\text{PO}_4)_6$           | trigonal     | 70% | -2.3  | 1135 |
| 40 | $\text{BaS}_2(\text{NO}_3)_2$                       | orthorhombic | 60% | -7.4  | 1132 |
| 41 | $\text{BaS}_5\text{O}_8$                            | orthorhombic | 70% | -27.7 | 1246 |
| 42 | $\text{BaSe}(\text{SO}_2)_4$                        | orthorhombic | 60% | -23.8 | 1242 |
| 43 | $\text{BaU}_2\text{P}_2\text{O}_{19}$               | monoclinic   | 60% | -1.4  | 1053 |
| 44 | $\text{BaU}_3\text{W}_3(\text{SeO}_7)_2$            | orthorhombic | 60% | -15.7 | 1030 |
| 45 | $\text{Bi}(\text{PO}_3)_4$                          | orthorhombic | 70% | -8.8  | 532  |
| 46 | $\text{Bi}_2\text{P}_2\text{O}_9$                   | orthorhombic | 70% | -6.7  | 508  |
| 47 | $\text{Br}_2\text{O}$                               | orthorhombic | 60% | -10.4 | 464  |
| 48 | $\text{BrO}_4$                                      | monoclinic   | 60% | -10.2 | 515  |
| 49 | $\text{C}(\text{N}_2\text{O})_2$                    | orthorhombic | 60% | -18.0 | 494  |
| 50 | $\text{C}_3\text{O}_2$                              | orthorhombic | 70% | -20.2 | 472  |

|    |                        |              |      |       |      |
|----|------------------------|--------------|------|-------|------|
| 51 | $C_4(N_3O)_3$          | orthorhombic | 60%  | -17.3 | 504  |
| 52 | $Ca(IO_6)_2$           | orthorhombic | 80%  | -18.7 | 626  |
| 53 | $Ca(Si_9O_{19})_2$     | hexagonal    | 70%  | -33.6 | 674  |
| 54 | $Ca_2S_3(NO_6)_2$      | cubic        | 70%  | -6.6  | 638  |
| 55 | $Ca_2UO_{17}$          | orthorhombic | 60%  | -3.6  | 1098 |
| 56 | $Ca_3W_2O_9$           | orthorhombic | 60%  | -9.5  | 589  |
| 57 | $CaC_2S_2(OF)_6$       | trigonal     | 70%  | -24.2 | 864  |
| 58 | $CaFe_2Sb_2(PO_4)_6$   | trigonal     | 60%  | -2.6  | 720  |
| 59 | $CaMo_2O_7$            | monoclinic   | 60%  | -5.5  | 644  |
| 60 | $CaMo_2P_2O_9$         | orthorhombic | 90%  | -2.1  | 638  |
| 61 | $CaNiMoP_2O_9$         | orthorhombic | 70%  | -1.1  | 655  |
| 62 | $CaP_4O_{11}$          | orthorhombic | 60%  | -5.9  | 693  |
| 63 | $CaPNO_{11}$           | monoclinic   | 80%  | -4.8  | 642  |
| 64 | $CaW_2O_7$             | monoclinic   | 80%  | -24.0 | 493  |
| 65 | $Cd(NO_3)_2$           | orthorhombic | 80%  | -6.8  | 357  |
| 66 | $Cd_2ClO_3$            | orthorhombic | 70%  | -16.2 | 391  |
| 67 | $Cd_2Cu_2P_2SO_{17}$   | orthorhombic | 90%  | -7.9  | 381  |
| 68 | $Cd_2Ni(ClO_2)_6$      | orthorhombic | 80%  | -9.6  | 481  |
| 69 | $Cd_2Ni(ClO_2)_6$      | orthorhombic | 70%  | -9.3  | 478  |
| 70 | $Cd_2S_3(NO_6)_2$      | cubic        | 80%  | -6.3  | 651  |
| 71 | $Cd_8S_2O_{23}$        | monoclinic   | 80%  | -4.8  | 612  |
| 72 | $CdC_3NO_6$            | orthorhombic | 80%  | -15.3 | 470  |
| 73 | $CdCl_2O$              | orthorhombic | 60%  | -12.1 | 439  |
| 74 | $CdCN_3Cl_2O$          | orthorhombic | 60%  | -14.5 | 443  |
| 75 | $CdCo_3(PO_3)_8$       | monoclinic   | 70%  | -5.0  | 566  |
| 76 | $CdCuP_2O_7$           | monoclinic   | 90%  | -3.8  | 210  |
| 77 | $CdFe_2Sb_2(PO_4)_6$   | trigonal     | 70%  | -4.7  | 578  |
| 78 | $CdFeC_5N_6O$          | orthorhombic | 80%  | -17.7 | 669  |
| 79 | $CdHC_2(NO)_4$         | orthorhombic | 80%  | -29.0 | 570  |
| 80 | $CdIClO_3$             | orthorhombic | 70%  | -11.7 | 383  |
| 81 | $CdPNO_5$              | orthorhombic | 80%  | -8.2  | 334  |
| 82 | $Ce(WO_4)_2$           | cubic        | 100% | -17.1 | 1017 |
| 83 | $CeMo_{12}(NO_{27})_2$ | trigonal     | 70%  | -5.6  | 1187 |
| 84 | $CeMo_{12}(NO_{27})_2$ | trigonal     | 70%  | -5.6  | 1187 |
| 85 | $CN_6O$                | orthorhombic | 60%  | -18.0 | 487  |
| 86 | $CNO$                  | orthorhombic | 60%  | -16.7 | 464  |
| 87 | $Co_2Br_3(N_2O)_3$     | monoclinic   | 60%  | -12.6 | 407  |

|     |                                                   |              |      |       |     |
|-----|---------------------------------------------------|--------------|------|-------|-----|
| 88  | $\text{Co}_2\text{Br}_3\text{N}_7\text{O}_2$      | orthorhombic | 60%  | -13.4 | 405 |
| 89  | $\text{Co}_2\text{CN}_9(\text{Cl}_2\text{O}_3)_2$ | orthorhombic | 70%  | -19.5 | 604 |
| 90  | $\text{Co}_3(\text{PO}_4)_4$                      | monoclinic   | 60%  | -7.5  | 583 |
| 91  | $\text{Co}_3\text{P}_4\text{O}_{15}$              | orthorhombic | 70%  | -9.3  | 583 |
| 92  | $\text{Co}_3\text{P}_6\text{WO}_{24}$             | trigonal     | 90%  | -8.4  | 679 |
| 93  | $\text{Co}_4\text{Se}_3\text{Cl}_2\text{O}_9$     | orthorhombic | 60%  | -7.6  | 381 |
| 94  | $\text{Co}_6\text{Ge}_2(\text{CO})_{19}$          | orthorhombic | 80%  | -3.6  | 669 |
| 95  | $\text{CoAgO}_2$                                  | hexagonal    | 70%  | -0.4  | 401 |
| 96  | $\text{CoAs}_3\text{OF}_{18}$                     | orthorhombic | 60%  | -6.0  | 707 |
| 97  | $\text{CoCBrN}_4\text{O}_3$                       | orthorhombic | 60%  | -8.0  | 429 |
| 98  | $\text{CoCuSe}_2(\text{ClO}_5)_2$                 | orthorhombic | 80%  | -7.2  | 492 |
| 99  | $\text{CoN}_7\text{ClO}_5$                        | orthorhombic | 60%  | -20.0 | 457 |
| 100 | $\text{CoNCl}_4\text{O}_3$                        | orthorhombic | 70%  | -15.2 | 490 |
| 101 | $\text{CoO}_2$                                    | orthorhombic | 60%  | -14.5 | 434 |
| 102 | $\text{CoP}_2\text{O}_7$                          | monoclinic   | 60%  | -9.0  | 445 |
| 103 | $\text{CoP}_6(\text{WO}_8)_3$                     | trigonal     | 90%  | -6.9  | 607 |
| 104 | $\text{CoPNO}_{10}$                               | orthorhombic | 80%  | -5.3  | 546 |
| 105 | $\text{CoPNO}_5$                                  | orthorhombic | 80%  | -8.6  | 369 |
| 106 | $\text{CoPO}_4$                                   | orthorhombic | 90%  | -8.7  | 516 |
| 107 | $\text{CoS}_2\text{N}_5\text{ClO}_4$              | orthorhombic | 60%  | -18.2 | 476 |
| 108 | $\text{CoSeO}_3$                                  | monoclinic   | 60%  | -1.9  | 650 |
| 109 | $\text{CoSiO}_4$                                  | orthorhombic | 60%  | -7.9  | 586 |
| 110 | $\text{Cr}(\text{CO})_6$                          | orthorhombic | 60%  | -21.4 | 573 |
| 111 | $\text{Cr}(\text{PO}_3)_4$                        | orthorhombic | 90%  | -1.3  | 753 |
| 112 | $\text{Cr}_2(\text{PO}_4)_3$                      | trigonal     | 90%  | -7.8  | 661 |
| 113 | $\text{Cr}_2\text{Fe}_3\text{P}_6\text{WO}_{24}$  | trigonal     | 90%  | -3.5  | 605 |
| 114 | $\text{Cr}_3(\text{CoO}_6)_2$                     | orthorhombic | 70%  | -2.7  | 755 |
| 115 | $\text{Cr}_3(\text{CuO}_6)_2$                     | orthorhombic | 70%  | -1.8  | 747 |
| 116 | $\text{Cr}_3(\text{FeO}_6)_2$                     | orthorhombic | 70%  | -2.8  | 787 |
| 117 | $\text{Cr}_3(\text{PO}_4)_4$                      | monoclinic   | 90%  | -13.7 | 687 |
| 118 | $\text{Cr}_3\text{Co}(\text{PO}_4)_6$             | trigonal     | 80%  | -5.0  | 612 |
| 119 | $\text{Cr}_3\text{Fe}(\text{PO}_4)_6$             | trigonal     | 70%  | -7.7  | 633 |
| 120 | $\text{Cr}_3\text{Ni}(\text{PO}_4)_6$             | trigonal     | 80%  | -7.4  | 630 |
| 121 | $\text{Cr}_3\text{O}_7$                           | orthorhombic | 70%  | -3.1  | 750 |
| 122 | $\text{Cr}_3\text{P}_4\text{O}_{15}$              | orthorhombic | 90%  | -10.3 | 689 |
| 123 | $\text{Cr}_3\text{P}_6\text{WO}_{24}$             | trigonal     | 100% | -8.3  | 681 |
| 124 | $\text{Cr}_3\text{Sb}(\text{PO}_4)_6$             | trigonal     | 80%  | -4.4  | 641 |

|     |                                                       |              |      |       |      |
|-----|-------------------------------------------------------|--------------|------|-------|------|
| 125 | $\text{Cr}_4(\text{PO}_4)_3$                          | orthorhombic | 70%  | -4.3  | 608  |
| 126 | $\text{Cr}_4\text{CuO}_{12}$                          | monoclinic   | 60%  | -0.7  | 559  |
| 127 | $\text{Cr}_5\text{O}_{12}$                            | orthorhombic | 70%  | -3.9  | 684  |
| 128 | $\text{CrC}_5\text{SO}_7$                             | orthorhombic | 60%  | -21.6 | 535  |
| 129 | $\text{CrC}_6\text{N}_{12}(\text{ClO}_3)_3$           | trigonal     | 60%  | -19.5 | 763  |
| 130 | $\text{CrFe}_3\text{Sb}_2(\text{PO}_4)_6$             | trigonal     | 70%  | -7.0  | 608  |
| 131 | $\text{CrFe}_3\text{Sn}_2(\text{PO}_4)_6$             | trigonal     | 70%  | -7.0  | 608  |
| 132 | $\text{CrN}_3\text{O}_4$                              | orthorhombic | 90%  | -17.3 | 598  |
| 133 | $\text{CrN}_6(\text{ClO})_2$                          | orthorhombic | 70%  | -9.7  | 581  |
| 134 | $\text{CrNiP}_2\text{O}_9$                            | orthorhombic | 90%  | -10.2 | 599  |
| 135 | $\text{CrP}_2\text{O}_7$                              | monoclinic   | 80%  | -10.1 | 633  |
| 136 | $\text{CrP}_6(\text{WO}_8)_3$                         | trigonal     | 100% | -7.0  | 600  |
| 137 | $\text{CrPO}_4\text{F}$                               | orthorhombic | 90%  | -9.9  | 657  |
| 138 | $\text{CrWO}_3$                                       | trigonal     | 60%  | -15.1 | 547  |
| 139 | $\text{CS}(\text{NO})_2$                              | orthorhombic | 60%  | -19.1 | 466  |
| 140 | $\text{Cs}_3\text{CoI}_4\text{NO}_3$                  | orthorhombic | 80%  | -19.9 | 1295 |
| 141 | $\text{CsC}(\text{OF})_2$                             | orthorhombic | 60%  | -2.9  | 1094 |
| 142 | $\text{CsIn}_3\text{H}_6(\text{Se}_3\text{O}_{10})_2$ | orthorhombic | 60%  | -1.6  | 1185 |
| 143 | $\text{CsIOF}_4$                                      | orthorhombic | 60%  | -15.6 | 1072 |
| 144 | $\text{CsSbOF}_4$                                     | orthorhombic | 70%  | -15.1 | 1181 |
| 145 | $\text{Cu}(\text{NO}_3)_2$                            | orthorhombic | 70%  | -0.6  | 488  |
| 146 | $\text{Cu}_2\text{NO}_6$                              | monoclinic   | 70%  | -4.4  | 269  |
| 147 | $\text{Cu}_2\text{P}_2\text{O}_7$                     | monoclinic   | 100% | -14.0 | 300  |
| 148 | $\text{Cu}_2\text{SeO}_4$                             | cubic        | 80%  | -3.0  | 418  |
| 149 | $\text{Cu}_2\text{Te}_2\text{Pb}(\text{ClO}_3)_2$     | monoclinic   | 60%  | -10.7 | 256  |
| 150 | $\text{Cu}_3\text{Mo}_2\text{O}_9$                    | orthorhombic | 60%  | -2.0  | 712  |
| 151 | $\text{Cu}_3\text{OF}_5$                              | monoclinic   | 60%  | -5.4  | 239  |
| 152 | $\text{Cu}_3\text{P}_2\text{NO}_6$                    | orthorhombic | 80%  | -14.0 | 397  |
| 153 | $\text{Cu}_3\text{SeO}_8$                             | orthorhombic | 60%  | -4.6  | 333  |
| 154 | $\text{Cu}_5\text{SeCl}_5\text{O}_4$                  | monoclinic   | 60%  | -13.5 | 357  |
| 155 | $\text{CuCClO}$                                       | orthorhombic | 60%  | -13.3 | 290  |
| 156 | $\text{CuClO}_2$                                      | monoclinic   | 70%  | -14.1 | 319  |
| 157 | $\text{CuCO}_3$                                       | monoclinic   | 80%  | -3.7  | 439  |
| 158 | $\text{CuHS}(\text{NO})_4$                            | orthorhombic | 70%  | -31.1 | 496  |
| 159 | $\text{CuMo}_3\text{O}_{11}$                          | orthorhombic | 60%  | -5.6  | 622  |
| 160 | $\text{CuO}$                                          | orthorhombic | 60%  | -2.4  | 412  |
| 161 | $\text{CuPO}_4$                                       | orthorhombic | 90%  | -7.7  | 407  |

|     |                                                                                   |              |      |       |      |
|-----|-----------------------------------------------------------------------------------|--------------|------|-------|------|
| 162 | CuSeClO <sub>5</sub>                                                              | orthorhombic | 70%  | -6.8  | 455  |
| 163 | CuSiO <sub>4</sub>                                                                | trigonal     | 60%  | -1.6  | 563  |
| 164 | CuSN <sub>4</sub> O <sub>5</sub>                                                  | orthorhombic | 80%  | -17.5 | 431  |
| 165 | Dy <sub>2</sub> (MoO <sub>4</sub> ) <sub>3</sub>                                  | orthorhombic | 100% | -18.7 | 1183 |
| 166 | Dy <sub>2</sub> (SeO <sub>4</sub> ) <sub>3</sub>                                  | orthorhombic | 100% | -8.7  | 1067 |
| 167 | Dy <sub>2</sub> Mo <sub>8</sub> O <sub>33</sub>                                   | monoclinic   | 80%  | -7.8  | 1116 |
| 168 | DyRe <sub>3</sub> O <sub>16</sub>                                                 | orthorhombic | 100% | -14.1 | 1089 |
| 169 | DySeClO <sub>3</sub>                                                              | orthorhombic | 90%  | -10.2 | 995  |
| 170 | ErSeClO <sub>3</sub>                                                              | orthorhombic | 90%  | -10.2 | 995  |
| 171 | Eu <sub>2</sub> (MoO <sub>4</sub> ) <sub>3</sub>                                  | orthorhombic | 70%  | -18.3 | 1175 |
| 172 | Eu <sub>2</sub> Mo <sub>5</sub> O <sub>18</sub>                                   | orthorhombic | 90%  | -13.5 | 1110 |
| 173 | Eu <sub>4</sub> Br <sub>6</sub> O                                                 | hexagonal    | 70%  | -15.3 | 1138 |
| 174 | EuBr <sub>2</sub> O                                                               | orthorhombic | 60%  | -13.5 | 1138 |
| 175 | EuSeClO <sub>3</sub>                                                              | orthorhombic | 90%  | -9.0  | 1020 |
| 176 | EuTl(MoO <sub>4</sub> ) <sub>2</sub>                                              | orthorhombic | 60%  | -14.5 | 1020 |
| 177 | Fe(Bi <sub>5</sub> O <sub>8</sub> ) <sub>5</sub>                                  | monoclinic   | 60%  | -8.3  | 668  |
| 178 | Fe(PO <sub>3</sub> ) <sub>4</sub>                                                 | monoclinic   | 60%  | -7.7  | 667  |
| 179 | Fe <sub>2</sub> Cu(PO <sub>5</sub> ) <sub>2</sub>                                 | monoclinic   | 100% | -13.0 | 465  |
| 180 | Fe <sub>2</sub> P <sub>3</sub> O <sub>13</sub>                                    | monoclinic   | 90%  | -7.5  | 636  |
| 181 | Fe <sub>2</sub> Sb(PO <sub>4</sub> ) <sub>3</sub>                                 | trigonal     | 60%  | -7.1  | 603  |
| 182 | Fe <sub>2</sub> Sn(PO <sub>4</sub> ) <sub>3</sub>                                 | trigonal     | 60%  | -3.6  | 602  |
| 183 | Fe <sub>3</sub> (P <sub>2</sub> O <sub>7</sub> ) <sub>2</sub>                     | orthorhombic | 80%  | -10.4 | 690  |
| 184 | Fe <sub>3</sub> (PO <sub>4</sub> ) <sub>4</sub>                                   | monoclinic   | 90%  | -10.1 | 663  |
| 185 | Fe <sub>3</sub> Co <sub>2</sub> P <sub>6</sub> WO <sub>24</sub>                   | trigonal     | 70%  | -6.1  | 584  |
| 186 | Fe <sub>3</sub> Co <sub>2</sub> Sb(PO <sub>4</sub> ) <sub>6</sub>                 | trigonal     | 60%  | -6.4  | 602  |
| 187 | Fe <sub>3</sub> CoSb <sub>2</sub> (PO <sub>4</sub> ) <sub>6</sub>                 | trigonal     | 60%  | -7.1  | 589  |
| 188 | Fe <sub>3</sub> Cu <sub>2</sub> Sb(PO <sub>4</sub> ) <sub>6</sub>                 | trigonal     | 90%  | -2.8  | 593  |
| 189 | Fe <sub>3</sub> Cu <sub>2</sub> Sn(PO <sub>4</sub> ) <sub>6</sub>                 | trigonal     | 90%  | -2.8  | 598  |
| 190 | Fe <sub>3</sub> Ni <sub>2</sub> P <sub>6</sub> WO <sub>24</sub>                   | trigonal     | 70%  | -4.2  | 595  |
| 191 | Fe <sub>3</sub> Ni <sub>2</sub> Sn(PO <sub>4</sub> ) <sub>6</sub>                 | trigonal     | 60%  | -4.2  | 552  |
| 192 | Fe <sub>3</sub> NiSb <sub>2</sub> (PO <sub>4</sub> ) <sub>6</sub>                 | trigonal     | 60%  | -3.5  | 591  |
| 193 | Fe <sub>3</sub> NiSn <sub>2</sub> (PO <sub>4</sub> ) <sub>6</sub>                 | trigonal     | 60%  | -3.5  | 591  |
| 194 | Fe <sub>3</sub> P <sub>4</sub> O <sub>15</sub>                                    | orthorhombic | 80%  | -10.5 | 664  |
| 195 | Fe <sub>3</sub> P <sub>6</sub> WO <sub>24</sub>                                   | trigonal     | 90%  | -8.6  | 676  |
| 196 | Fe <sub>3</sub> Sb(PO <sub>4</sub> ) <sub>6</sub>                                 | trigonal     | 70%  | -5.5  | 638  |
| 197 | Fe <sub>4</sub> Te <sub>2</sub> MoC <sub>14</sub> (SO <sub>7</sub> ) <sub>2</sub> | orthorhombic | 70%  | -7.7  | 957  |
| 198 | Fe <sub>5</sub> P <sub>6</sub> WO <sub>24</sub>                                   | trigonal     | 70%  | -6.1  | 591  |

|     |                                                    |              |      |       |      |
|-----|----------------------------------------------------|--------------|------|-------|------|
| 199 | $\text{Fe}_7\text{Sb}_3\text{P}_3(\text{ClO}_6)_3$ | orthorhombic | 60%  | -6.8  | 575  |
| 200 | $\text{FeAs}_2\text{H}_3\text{OF}_{13}$            | orthorhombic | 60%  | -11.8 | 725  |
| 201 | $\text{FeBiO}_3$                                   | trigonal     | 60%  | -12.1 | 502  |
| 202 | $\text{FeC}_3\text{NCl}_3\text{O}_2$               | orthorhombic | 60%  | -21.6 | 638  |
| 203 | $\text{FeC}_4\text{N}_2\text{O}_9$                 | monoclinic   | 70%  | -7.6  | 568  |
| 204 | $\text{FeCu}_2\text{As}_3\text{O}_{11}$            | orthorhombic | 60%  | -9.0  | 617  |
| 205 | $\text{FeH}_2\text{Cl}_5\text{O}_3$                | orthorhombic | 60%  | -26.0 | 651  |
| 206 | $\text{FeN}_2\text{Cl}_5\text{O}$                  | orthorhombic | 60%  | -17.2 | 526  |
| 207 | $\text{FeNi}_3\text{Sn}_2(\text{PO}_4)_6$          | trigonal     | 60%  | -6.2  | 555  |
| 208 | $\text{FeNiP}_2\text{O}_9$                         | orthorhombic | 80%  | -10.3 | 615  |
| 209 | $\text{FeP}_2\text{O}_7$                           | monoclinic   | 70%  | -10.5 | 575  |
| 210 | $\text{FeP}_6(\text{WO}_8)_3$                      | trigonal     | 90%  | -7.0  | 607  |
| 211 | $\text{FePbC}_5\text{N}_6\text{O}$                 | orthorhombic | 70%  | -14.4 | 645  |
| 212 | $\text{FePO}_4$                                    | orthorhombic | 100% | -8.8  | 563  |
| 213 | $\text{FeSb}(\text{P}_2\text{O}_7)_2$              | orthorhombic | 80%  | -1.7  | 740  |
| 214 | $\text{FeSiP}_3\text{O}_{11}$                      | trigonal     | 60%  | -4.1  | 673  |
| 215 | $\text{Ga}_2(\text{WO}_4)_3$                       | orthorhombic | 100% | -12.2 | 1011 |
| 216 | $\text{Ga}_2\text{Fe}(\text{PO}_4)_3$              | monoclinic   | 100% | -9.1  | 666  |
| 217 | $\text{Ga}_4\text{SbS}_9\text{N}_3\text{O}_2$      | cubic        | 70%  | -14.8 | 672  |
| 218 | $\text{GaO}$                                       | hexagonal    | 60%  | -6.1  | 318  |
| 219 | $\text{GaP}_2\text{O}_9$                           | monoclinic   | 80%  | -5.2  | 568  |
| 220 | $\text{Gd}(\text{ReO}_5)_3$                        | orthorhombic | 100% | -13.2 | 1083 |
| 221 | $\text{Gd}_2(\text{MoO}_4)_3$                      | orthorhombic | 90%  | -17.9 | 1177 |
| 222 | $\text{Gd}_2(\text{WO}_4)_3$                       | orthorhombic | 100% | -19.7 | 1127 |
| 223 | $\text{Gd}_2\text{Mo}_5\text{O}_{18}$              | orthorhombic | 90%  | -13.5 | 1112 |
| 224 | $\text{Gd}_3(\text{BrO}_3)_2$                      | orthorhombic | 60%  | -14.1 | 985  |
| 225 | $\text{GdSeClO}_3$                                 | orthorhombic | 80%  | -9.2  | 998  |
| 226 | $\text{Ge}_2\text{RuC}_4(\text{Cl}_3\text{O}_2)_2$ | monoclinic   | 70%  | -16.4 | 659  |
| 227 | $\text{GePClO}_2$                                  | orthorhombic | 70%  | -11.5 | 393  |
| 228 | $\text{GeWO}_4$                                    | cubic        | 80%  | -16.8 | 471  |
| 229 | $\text{H}_2\text{Os}_5(\text{CO})_{16}$            | orthorhombic | 60%  | -7.0  | 580  |
| 230 | $\text{Hf}(\text{PO}_5)_2$                         | monoclinic   | 70%  | -6.3  | 644  |
| 231 | $\text{Hf}_2\text{P}_2\text{O}_9$                  | orthorhombic | 70%  | -3.6  | 607  |
| 232 | $\text{HfP}_2\text{O}_7$                           | cubic        | 90%  | -11.1 | 514  |
| 233 | $\text{HgNO}_3$                                    | monoclinic   | 60%  | -7.4  | 395  |
| 234 | $\text{Ho}_2(\text{SeO}_4)_3$                      | orthorhombic | 100% | -9.0  | 1065 |
| 235 | $\text{Ho}_2(\text{SO}_4)_3$                       | trigonal     | 70%  | -6.2  | 1081 |

|     |                                                                               |              |      |       |      |
|-----|-------------------------------------------------------------------------------|--------------|------|-------|------|
| 236 | HoH <sub>16</sub> C <sub>2</sub> S <sub>2</sub> NO <sub>12</sub>              | orthorhombic | 60%  | -1.2  | 1085 |
| 237 | HoSeClO <sub>3</sub>                                                          | orthorhombic | 90%  | -10.2 | 996  |
| 238 | HoTeClO <sub>3</sub>                                                          | orthorhombic | 60%  | -15.4 | 973  |
| 239 | HRuN <sub>6</sub> Cl <sub>3</sub> O                                           | orthorhombic | 60%  | -23.2 | 493  |
| 240 | HS <sub>2</sub> N(O <sub>2</sub> F) <sub>2</sub>                              | monoclinic   | 60%  | -16.8 | 388  |
| 241 | InPO <sub>4</sub>                                                             | orthorhombic | 60%  | -0.4  | 315  |
| 242 | K <sub>2</sub> InBr <sub>5</sub> O                                            | orthorhombic | 70%  | -22.9 | 1221 |
| 243 | K <sub>2</sub> RuI <sub>5</sub> NO                                            | orthorhombic | 60%  | -20.8 | 1245 |
| 244 | K <sub>3</sub> Mo <sub>12</sub> PO <sub>40</sub>                              | cubic        | 70%  | -0.6  | 1205 |
| 245 | K <sub>3</sub> P(W <sub>3</sub> O <sub>10</sub> ) <sub>4</sub>                | cubic        | 80%  | -1.0  | 1108 |
| 246 | K <sub>3</sub> TaO <sub>2</sub> F <sub>7</sub> (Pnma)                         | orthorhombic | 60%  | -19.3 | 1070 |
| 247 | K <sub>3</sub> TaO <sub>2</sub> F <sub>7</sub> (Pna2_1)                       | orthorhombic | 60%  | -19.3 | 1066 |
| 248 | K <sub>4</sub> H <sub>4</sub> WC <sub>8</sub> (N <sub>4</sub> O) <sub>2</sub> | orthorhombic | 60%  | -24.9 | 1165 |
| 249 | K Al (SO <sub>7</sub> ) <sub>2</sub>                                          | cubic        | 90%  | -27.8 | 1334 |
| 250 | KMo <sub>2</sub> (PO <sub>4</sub> ) <sub>3</sub>                              | orthorhombic | 100% | -5.7  | 1191 |
| 251 | KNiPO <sub>10</sub>                                                           | monoclinic   | 80%  | -3.1  | 1100 |
| 252 | KP(OF) <sub>2</sub>                                                           | orthorhombic | 70%  | -0.1  | 1092 |
| 253 | KTb(N <sub>2</sub> O <sub>7</sub> ) <sub>2</sub>                              | orthorhombic | 60%  | -4.0  | 1067 |
| 254 | KU <sub>2</sub> (PO <sub>4</sub> ) <sub>3</sub>                               | trigonal     | 90%  | -5.6  | 1035 |
| 255 | KVOF <sub>3</sub>                                                             | orthorhombic | 60%  | -14.6 | 1096 |
| 256 | KZr <sub>2</sub> (AsO <sub>4</sub> ) <sub>3</sub>                             | trigonal     | 60%  | -2.7  | 1124 |
| 257 | La <sub>2</sub> Te <sub>3</sub> MoO <sub>12</sub>                             | orthorhombic | 70%  | -0.3  | 1041 |
| 258 | La <sub>2</sub> TeMo <sub>6</sub> O <sub>35</sub>                             | monoclinic   | 90%  | -4.5  | 1210 |
| 259 | Li <sub>2</sub> CoSn <sub>3</sub> (PO <sub>4</sub> ) <sub>6</sub>             | trigonal     | 90%  | -2.6  | 681  |
| 260 | Li <sub>2</sub> Fe <sub>2</sub> (WO <sub>4</sub> ) <sub>3</sub>               | orthorhombic | 60%  | -3.7  | 770  |
| 261 | Li <sub>2</sub> MnSi <sub>3</sub> O <sub>8</sub>                              | monoclinic   | 60%  | -1.5  | 464  |
| 262 | Li <sub>2</sub> NiSn <sub>3</sub> (PO <sub>4</sub> ) <sub>6</sub>             | trigonal     | 80%  | -0.4  | 691  |
| 263 | Li <sub>2</sub> Pd(N <sub>2</sub> O <sub>5</sub> ) <sub>2</sub>               | orthorhombic | 60%  | -9.1  | 599  |
| 264 | Li <sub>2</sub> Sn <sub>2</sub> (SO <sub>4</sub> ) <sub>3</sub>               | orthorhombic | 70%  | -4.5  | 664  |
| 265 | Li <sub>2</sub> TiSn <sub>3</sub> (PO <sub>4</sub> ) <sub>6</sub>             | trigonal     | 80%  | -2.3  | 752  |
| 266 | Li <sub>2</sub> V <sub>2</sub> Sn(PO <sub>4</sub> ) <sub>3</sub>              | monoclinic   | 70%  | -1.1  | 554  |
| 267 | Li <sub>3</sub> In <sub>2</sub> (PO <sub>4</sub> ) <sub>3</sub>               | trigonal     | 80%  | -0.2  | 543  |
| 268 | Li <sub>3</sub> Sb <sub>2</sub> (PO <sub>4</sub> ) <sub>3</sub>               | trigonal     | 90%  | -5.5  | 531  |
| 269 | Li <sub>3</sub> Sn <sub>2</sub> (PO <sub>4</sub> ) <sub>3</sub>               | trigonal     | 90%  | -6.1  | 534  |
| 270 | Li <sub>4</sub> V <sub>3</sub> P <sub>8</sub> O <sub>29</sub>                 | monoclinic   | 60%  | -2.2  | 712  |
| 271 | LiAl(PO <sub>3</sub> ) <sub>4</sub>                                           | orthorhombic | 70%  | -4.2  | 617  |
| 272 | LiAlGeO <sub>4</sub>                                                          | trigonal     | 80%  | -1.1  | 467  |



|     |                                                                   |              |     |       |     |
|-----|-------------------------------------------------------------------|--------------|-----|-------|-----|
| 273 | LiAlS <sub>3</sub> (Cl <sub>2</sub> O <sub>3</sub> ) <sub>2</sub> | orthorhombic | 70% | -24.0 | 688 |
| 274 | LiBi(PO <sub>3</sub> ) <sub>4</sub>                               | orthorhombic | 70% | -6.9  | 664 |
| 275 | LiCo(PO <sub>3</sub> ) <sub>4</sub>                               | orthorhombic | 80% | -8.6  | 635 |
| 276 | LiCo <sub>2</sub> (CO <sub>3</sub> ) <sub>4</sub>                 | monoclinic   | 70% | -6.5  | 560 |
| 277 | LiCo <sub>2</sub> (PO <sub>4</sub> ) <sub>3</sub>                 | monoclinic   | 70% | -3.1  | 708 |
| 278 | LiCo <sub>3</sub> Sb(PO <sub>4</sub> ) <sub>6</sub>               | trigonal     | 90% | -6.5  | 671 |
| 279 | LiCoSiO <sub>4</sub>                                              | monoclinic   | 60% | -4.5  | 562 |
| 280 | LiCr(PO <sub>3</sub> ) <sub>4</sub>                               | orthorhombic | 70% | -6.4  | 637 |
| 281 | LiCr <sub>4</sub> (PO <sub>4</sub> ) <sub>3</sub>                 | orthorhombic | 60% | -2.1  | 689 |
| 282 | LiCu(PO <sub>3</sub> ) <sub>3</sub>                               | orthorhombic | 70% | -3.4  | 679 |
| 283 | LiFe(PO <sub>3</sub> ) <sub>4</sub>                               | orthorhombic | 70% | -8.0  | 639 |
| 284 | LiFe <sub>2</sub> (CO <sub>3</sub> ) <sub>4</sub>                 | monoclinic   | 60% | -8.4  | 568 |
| 285 | LiFe <sub>2</sub> OF <sub>3</sub>                                 | orthorhombic | 60% | -11.3 | 547 |
| 286 | LiFe <sub>6</sub> (OF <sub>2</sub> ) <sub>4</sub>                 | monoclinic   | 70% | -3.4  | 475 |
| 287 | LiGa(PO <sub>3</sub> ) <sub>4</sub>                               | orthorhombic | 80% | -7.5  | 646 |
| 288 | LiGePCO <sub>7</sub>                                              | monoclinic   | 60% | -1.1  | 586 |
| 289 | LiHfPCO <sub>7</sub>                                              | monoclinic   | 60% | -4.1  | 621 |
| 290 | LiInP <sub>2</sub> O <sub>7</sub>                                 | monoclinic   | 60% | -1.5  | 653 |
| 291 | LiMn(PO <sub>3</sub> ) <sub>3</sub>                               | orthorhombic | 60% | -7.3  | 673 |
| 292 | LiMn(PO <sub>3</sub> ) <sub>4</sub>                               | orthorhombic | 80% | -8.5  | 636 |
| 293 | LiMn <sub>4</sub> (PO <sub>4</sub> ) <sub>3</sub>                 | orthorhombic | 60% | -7.9  | 508 |
| 294 | LiMo(PO <sub>3</sub> ) <sub>4</sub>                               | orthorhombic | 80% | -10.1 | 703 |
| 295 | LiMo <sub>2</sub> (PO <sub>4</sub> ) <sub>3</sub>                 | monoclinic   | 70% | -6.4  | 650 |
| 296 | LiMo <sub>2</sub> P <sub>2</sub> O <sub>9</sub>                   | orthorhombic | 70% | -2.9  | 719 |
| 297 | LiMo <sub>2</sub> P <sub>3</sub> O <sub>13</sub>                  | monoclinic   | 70% | -9.0  | 626 |
| 298 | LiNb(PO <sub>3</sub> ) <sub>4</sub>                               | orthorhombic | 70% | -8.5  | 688 |
| 299 | LiNbCo <sub>3</sub> (PO <sub>4</sub> ) <sub>6</sub>               | trigonal     | 80% | -5.3  | 723 |
| 300 | LiNbSn <sub>3</sub> (PO <sub>4</sub> ) <sub>6</sub>               | trigonal     | 80% | -3.4  | 734 |
| 301 | LiNi(PO <sub>3</sub> ) <sub>3</sub>                               | orthorhombic | 70% | -4.1  | 667 |
| 302 | LiNi(PO <sub>3</sub> ) <sub>4</sub>                               | orthorhombic | 80% | -8.4  | 630 |
| 303 | LiNi <sub>2</sub> OF <sub>3</sub>                                 | orthorhombic | 70% | -11.3 | 534 |
| 304 | LiNi <sub>2</sub> P <sub>3</sub> O <sub>11</sub>                  | monoclinic   | 60% | -7.0  | 591 |
| 305 | LiNiP <sub>2</sub> O <sub>7</sub>                                 | monoclinic   | 60% | -1.6  | 586 |
| 306 | LiP(WO <sub>4</sub> ) <sub>2</sub>                                | monoclinic   | 60% | -6.8  | 544 |
| 307 | LiP <sub>3</sub> (WO <sub>6</sub> ) <sub>2</sub>                  | monoclinic   | 80% | -2.4  | 648 |
| 308 | LiP <sub>3</sub> W <sub>2</sub> O <sub>13</sub>                   | monoclinic   | 80% | -8.9  | 534 |
| 309 | LiP <sub>4</sub> WO <sub>12</sub>                                 | orthorhombic | 90% | -11.1 | 681 |

|     |                                                                                           |              |     |       |      |
|-----|-------------------------------------------------------------------------------------------|--------------|-----|-------|------|
| 310 | LiPWCO <sub>7</sub>                                                                       | monoclinic   | 60% | -7.9  | 588  |
| 311 | LiS <sub>2</sub> N <sub>3</sub> O <sub>8</sub>                                            | monoclinic   | 70% | -8.5  | 554  |
| 312 | LiSb(PO <sub>3</sub> ) <sub>4</sub>                                                       | monoclinic   | 60% | -4.8  | 644  |
| 313 | LiSbP <sub>2</sub> O <sub>7</sub>                                                         | orthorhombic | 60% | -2.2  | 703  |
| 314 | LiSn(PO <sub>3</sub> ) <sub>3</sub>                                                       | orthorhombic | 80% | -6.7  | 668  |
| 315 | LiSn(PO <sub>3</sub> ) <sub>4</sub>                                                       | orthorhombic | 80% | -10.0 | 657  |
| 316 | LiSn <sub>2</sub> (PO <sub>4</sub> ) <sub>3</sub>                                         | orthorhombic | 70% | -4.5  | 645  |
| 317 | LiSn <sub>4</sub> (PO <sub>4</sub> ) <sub>3</sub>                                         | orthorhombic | 60% | -3.4  | 569  |
| 318 | LiTi(PO <sub>3</sub> ) <sub>4</sub>                                                       | orthorhombic | 70% | -4.4  | 672  |
| 319 | LiTi <sub>2</sub> P <sub>3</sub> O <sub>11</sub>                                          | monoclinic   | 60% | -5.1  | 627  |
| 320 | LiTi <sub>3</sub> Nb(PO <sub>4</sub> ) <sub>6</sub>                                       | trigonal     | 70% | -3.9  | 696  |
| 321 | LiTi <sub>3</sub> Sb(PO <sub>4</sub> ) <sub>6</sub>                                       | trigonal     | 80% | -6.2  | 709  |
| 322 | LiTi <sub>3</sub> V(PO <sub>4</sub> ) <sub>6</sub>                                        | trigonal     | 70% | -4.9  | 686  |
| 323 | LiV(PO <sub>3</sub> ) <sub>3</sub>                                                        | orthorhombic | 60% | -7.5  | 694  |
| 324 | LiV(PO <sub>3</sub> ) <sub>4</sub>                                                        | orthorhombic | 70% | -4.8  | 657  |
| 325 | LiV <sub>2</sub> P <sub>3</sub> O <sub>11</sub>                                           | monoclinic   | 60% | -6.5  | 591  |
| 326 | LiVCo <sub>3</sub> (PO <sub>4</sub> ) <sub>6</sub>                                        | trigonal     | 80% | -1.8  | 706  |
| 327 | LiVSn <sub>3</sub> (PO <sub>4</sub> ) <sub>6</sub>                                        | trigonal     | 80% | -3.6  | 692  |
| 328 | LiZr <sub>2</sub> (AsO <sub>4</sub> ) <sub>3</sub>                                        | trigonal     | 70% | -0.4  | 660  |
| 329 | LiZr <sub>2</sub> (PO <sub>4</sub> ) <sub>3</sub>                                         | monoclinic   | 80% | -2.3  | 745  |
| 330 | Lu(PO <sub>3</sub> ) <sub>3</sub>                                                         | trigonal     | 80% | -7.6  | 1126 |
| 331 | LuSeClO <sub>3</sub>                                                                      | orthorhombic | 80% | -9.4  | 938  |
| 332 | Mg <sub>2</sub> Tl <sub>2</sub> (MoO <sub>4</sub> ) <sub>3</sub>                          | cubic        | 80% | -9.1  | 826  |
| 333 | MgBr <sub>2</sub> O                                                                       | orthorhombic | 60% | -27.4 | 492  |
| 334 | MgCd <sub>2</sub> (ClO <sub>2</sub> ) <sub>6</sub> (Total Magnetization=<br>8.00 μB/f.u.) | orthorhombic | 80% | -26.5 | 552  |
| 335 | MgCd <sub>2</sub> (ClO <sub>2</sub> ) <sub>6</sub> (Total Magnetization=<br>4.00 μB/f.u.) | orthorhombic | 80% | -21.2 | 543  |
| 336 | MgH <sub>6</sub> S <sub>2</sub> O <sub>3</sub>                                            | orthorhombic | 60% | -30.0 | 580  |
| 337 | MgMo <sub>2</sub> O <sub>7</sub>                                                          | monoclinic   | 80% | -5.0  | 655  |
| 338 | MgMo <sub>2</sub> P <sub>2</sub> O <sub>9</sub>                                           | orthorhombic | 90% | -6.1  | 545  |
| 339 | MgP <sub>2</sub> W <sub>2</sub> O <sub>9</sub>                                            | orthorhombic | 70% | -7.5  | 519  |
| 340 | MgS <sub>8</sub> (O <sub>5</sub> F <sub>2</sub> ) <sub>4</sub>                            | monoclinic   | 70% | -26.6 | 592  |
| 341 | MgTe(BrO) <sub>6</sub>                                                                    | cubic        | 80% | -23.5 | 698  |
| 342 | MgTe(ClO) <sub>6</sub>                                                                    | trigonal     | 70% | -24.0 | 435  |
| 343 | MgTe(IO) <sub>6</sub>                                                                     | cubic        | 80% | -25.3 | 676  |
| 344 | MgU <sub>2</sub> Cr <sub>2</sub> O <sub>16</sub>                                          | orthorhombic | 80% | -2.6  | 1078 |
| 345 | MgVFeMo <sub>3</sub> O <sub>14</sub>                                                      | monoclinic   | 60% | -3.9  | 616  |

|     |                                                                   |              |     |       |     |
|-----|-------------------------------------------------------------------|--------------|-----|-------|-----|
| 346 | MgW <sub>2</sub> O <sub>7</sub>                                   | monoclinic   | 70% | -6.3  | 593 |
| 347 | Mn(C <sub>2</sub> O <sub>3</sub> ) <sub>2</sub>                   | trigonal     | 70% | -18.4 | 372 |
| 348 | Mn <sub>2</sub> Al <sub>3</sub> Fe(PO <sub>7</sub> ) <sub>3</sub> | monoclinic   | 70% | -8.6  | 521 |
| 349 | Mn <sub>2</sub> Cr <sub>3</sub> (NO <sub>6</sub> ) <sub>2</sub>   | cubic        | 60% | -9.0  | 864 |
| 350 | Mn <sub>2</sub> Cr <sub>3</sub> O <sub>12</sub>                   | orthorhombic | 70% | -3.6  | 731 |
| 351 | Mn <sub>2</sub> CrFe <sub>3</sub> (PO <sub>4</sub> ) <sub>6</sub> | trigonal     | 70% | -2.0  | 641 |
| 352 | Mn <sub>2</sub> CrNi <sub>3</sub> (PO <sub>4</sub> ) <sub>6</sub> | trigonal     | 70% | -6.5  | 569 |
| 353 | Mn <sub>2</sub> Cu(PO <sub>4</sub> ) <sub>3</sub>                 | trigonal     | 80% | -0.5  | 447 |
| 354 | Mn <sub>2</sub> Fe <sub>3</sub> Cu(PO <sub>4</sub> ) <sub>6</sub> | trigonal     | 70% | -5.8  | 567 |
| 355 | Mn <sub>2</sub> Fe <sub>3</sub> Ni(PO <sub>4</sub> ) <sub>6</sub> | trigonal     | 60% | -5.8  | 558 |
| 356 | Mn <sub>2</sub> Fe <sub>3</sub> P <sub>6</sub> WO <sub>24</sub>   | trigonal     | 70% | -3.8  | 583 |
| 357 | Mn <sub>2</sub> Fe <sub>3</sub> Sb(PO <sub>4</sub> ) <sub>6</sub> | trigonal     | 60% | -3.9  | 571 |
| 358 | Mn <sub>2</sub> Fe <sub>3</sub> Sn(PO <sub>4</sub> ) <sub>6</sub> | trigonal     | 60% | -3.7  | 603 |
| 359 | Mn <sub>2</sub> NbFe <sub>3</sub> (PO <sub>4</sub> ) <sub>6</sub> | trigonal     | 70% | -2.4  | 695 |
| 360 | Mn <sub>2</sub> NbNi <sub>3</sub> (PO <sub>4</sub> ) <sub>6</sub> | trigonal     | 70% | -4.0  | 637 |
| 361 | Mn <sub>2</sub> NbV <sub>3</sub> (PO <sub>4</sub> ) <sub>6</sub>  | trigonal     | 70% | -0.5  | 687 |
| 362 | Mn <sub>2</sub> Ni <sub>3</sub> P <sub>6</sub> WO <sub>24</sub>   | trigonal     | 70% | -7.5  | 598 |
| 363 | Mn <sub>2</sub> P <sub>2</sub> O <sub>7</sub> F <sub>2</sub>      | orthorhombic | 70% | -6.3  | 550 |
| 364 | Mn <sub>2</sub> P <sub>2</sub> O <sub>9</sub>                     | orthorhombic | 70% | -7.3  | 520 |
| 365 | Mn <sub>2</sub> Tl <sub>2</sub> (MoO <sub>4</sub> ) <sub>3</sub>  | cubic        | 70% | -16.0 | 921 |
| 366 | Mn <sub>2</sub> Tl <sub>2</sub> (SO <sub>4</sub> ) <sub>3</sub>   | cubic        | 60% | -2.8  | 626 |
| 367 | Mn <sub>2</sub> V <sub>3</sub> Cr(PO <sub>4</sub> ) <sub>6</sub>  | trigonal     | 70% | -0.6  | 640 |
| 368 | Mn <sub>2</sub> V <sub>3</sub> Cu(PO <sub>4</sub> ) <sub>6</sub>  | trigonal     | 70% | -0.7  | 647 |
| 369 | Mn <sub>2</sub> V <sub>3</sub> P <sub>6</sub> WO <sub>24</sub>    | trigonal     | 70% | -3.7  | 583 |
| 370 | Mn <sub>2</sub> V <sub>3</sub> Sb(PO <sub>4</sub> ) <sub>6</sub>  | trigonal     | 60% | -2.3  | 659 |
| 371 | Mn <sub>2</sub> V <sub>3</sub> Sn(PO <sub>4</sub> ) <sub>6</sub>  | trigonal     | 60% | -1.6  | 682 |
| 372 | Mn <sub>2</sub> VF <sub>3</sub> (PO <sub>4</sub> ) <sub>6</sub>   | trigonal     | 60% | -1.5  | 653 |
| 373 | Mn <sub>2</sub> VNi <sub>3</sub> (PO <sub>4</sub> ) <sub>6</sub>  | trigonal     | 60% | -6.9  | 583 |
| 374 | Mn <sub>3</sub> (P <sub>2</sub> O <sub>7</sub> ) <sub>2</sub>     | orthorhombic | 90% | -6.2  | 590 |
| 375 | Mn <sub>3</sub> (PO <sub>4</sub> ) <sub>4</sub>                   | monoclinic   | 70% | -9.5  | 566 |
| 376 | Mn <sub>3</sub> (PO <sub>7</sub> ) <sub>2</sub>                   | monoclinic   | 70% | -9.8  | 523 |
| 377 | Mn <sub>3</sub> Cr(PO <sub>4</sub> ) <sub>6</sub>                 | trigonal     | 90% | -7.9  | 617 |
| 378 | Mn <sub>3</sub> Cr <sub>2</sub> Sb(PO <sub>4</sub> ) <sub>6</sub> | trigonal     | 90% | -4.2  | 583 |
| 379 | Mn <sub>3</sub> Cr <sub>2</sub> Sn(PO <sub>4</sub> ) <sub>6</sub> | trigonal     | 90% | -4.0  | 636 |
| 380 | Mn <sub>3</sub> CrSn <sub>2</sub> (PO <sub>4</sub> ) <sub>6</sub> | trigonal     | 70% | -7.0  | 592 |
| 381 | Mn <sub>3</sub> CrTe <sub>2</sub> (PO <sub>4</sub> ) <sub>6</sub> | trigonal     | 60% | -3.8  | 601 |
| 382 | Mn <sub>3</sub> Cu <sub>2</sub> Sn(PO <sub>4</sub> ) <sub>6</sub> | trigonal     | 80% | -2.8  | 416 |

|     |                                                   |              |     |       |     |
|-----|---------------------------------------------------|--------------|-----|-------|-----|
| 383 | $\text{Mn}_3\text{Fe}_2\text{P}_6\text{WO}_{24}$  | trigonal     | 70% | -7.5  | 588 |
| 384 | $\text{Mn}_3\text{Fe}_2\text{Sb}(\text{PO}_4)_6$  | trigonal     | 60% | -7.3  | 576 |
| 385 | $\text{Mn}_3\text{Fe}_2\text{Sn}(\text{PO}_4)_6$  | trigonal     | 60% | -6.4  | 631 |
| 386 | $\text{Mn}_3\text{FeSn}_2(\text{PO}_4)_6$         | trigonal     | 60% | -7.1  | 591 |
| 387 | $\text{Mn}_3\text{Nb}(\text{PO}_4)_6$             | trigonal     | 90% | -8.1  | 698 |
| 388 | $\text{Mn}_3\text{NbCo}_2(\text{PO}_4)_6$         | trigonal     | 70% | -4.5  | 630 |
| 389 | $\text{Mn}_3\text{NbCr}_2(\text{PO}_4)_6$         | trigonal     | 90% | -3.8  | 622 |
| 390 | $\text{Mn}_3\text{NbFe}_2(\text{PO}_4)_6$         | trigonal     | 70% | -5.2  | 620 |
| 391 | $\text{Mn}_3\text{NbNi}_2(\text{PO}_4)_6$         | trigonal     | 70% | -4.9  | 621 |
| 392 | $\text{Mn}_3\text{Ni}_2\text{P}_6\text{WO}_{24}$  | trigonal     | 70% | -6.6  | 582 |
| 393 | $\text{Mn}_3\text{O}_4$                           | monoclinic   | 70% | -16.3 | 485 |
| 394 | $\text{Mn}_3\text{P}_6\text{WO}_{24}$             | trigonal     | 90% | -8.5  | 665 |
| 395 | $\text{Mn}_3\text{Sb}(\text{PO}_4)_6$             | trigonal     | 60% | -4.6  | 535 |
| 396 | $\text{Mn}_3\text{Sn}(\text{PO}_4)_6$             | trigonal     | 60% | -3.0  | 538 |
| 397 | $\text{Mn}_3\text{V}(\text{PO}_4)_6$              | trigonal     | 70% | -8.2  | 640 |
| 398 | $\text{Mn}_3\text{VCr}_2(\text{PO}_4)_6$          | trigonal     | 90% | -1.3  | 614 |
| 399 | $\text{Mn}_3\text{VCu}_2(\text{PO}_4)_6$          | trigonal     | 90% | -2.4  | 637 |
| 400 | $\text{Mn}_3\text{VFe}_2(\text{PO}_4)_6$          | trigonal     | 60% | -4.4  | 577 |
| 401 | $\text{Mn}_3\text{VSb}_2(\text{PO}_4)_6$          | trigonal     | 70% | -4.6  | 671 |
| 402 | $\text{Mn}_3\text{VTe}_2(\text{PO}_4)_6$          | trigonal     | 60% | -4.3  | 683 |
| 403 | $\text{Mn}_5\text{Cu}(\text{PO}_4)_4$             | monoclinic   | 70% | -2.2  | 422 |
| 404 | $\text{Mn}_5\text{Cu}(\text{PO}_4)_6$             | trigonal     | 60% | -0.2  | 451 |
| 405 | $\text{Mn}_5\text{P}_6\text{WO}_{24}$             | trigonal     | 80% | -2.7  | 642 |
| 406 | $\text{MnAsNO}_5$                                 | orthorhombic | 70% | -7.0  | 409 |
| 407 | $\text{MnAsO}_5$                                  | monoclinic   | 60% | -5.9  | 359 |
| 408 | $\text{MnC}_3\text{BrO}_5$                        | orthorhombic | 60% | -15.2 | 463 |
| 409 | $\text{MnC}_6\text{S}_2\text{NO}_5\text{F}_6$     | orthorhombic | 60% | -7.1  | 618 |
| 410 | $\text{MnCr}_3(\text{PO}_4)_6$                    | trigonal     | 90% | -8.0  | 616 |
| 411 | $\text{MnFe}(\text{PO}_4)_2$                      | trigonal     | 60% | -1.1  | 630 |
| 412 | $\text{MnFe}_2(\text{PO}_4)_3$                    | trigonal     | 60% | -5.8  | 554 |
| 413 | $\text{MnFe}_2\text{Sb}_2(\text{PO}_4)_6$         | trigonal     | 60% | -5.5  | 665 |
| 414 | $\text{MnFe}_3\text{Sb}_2(\text{PO}_4)_6$         | trigonal     | 60% | -7.5  | 602 |
| 415 | $\text{MnFe}_3\text{Sn}_2(\text{PO}_4)_6$         | trigonal     | 60% | -6.6  | 593 |
| 416 | $\text{MnH}_{12}\text{C}_2\text{NCl}_3\text{O}_2$ | orthorhombic | 60% | -25.5 | 593 |
| 417 | $\text{MnNb}_3(\text{PO}_4)_6$                    | trigonal     | 90% | -8.3  | 695 |
| 418 | $\text{MnNO}_4$                                   | orthorhombic | 80% | -19.1 | 443 |
| 419 | $\text{MnO}_2$                                    | orthorhombic | 60% | -16.8 | 501 |

|     |                                                                  |              |      |       |     |
|-----|------------------------------------------------------------------|--------------|------|-------|-----|
| 420 | MnP <sub>2</sub> O <sub>7</sub>                                  | cubic        | 70%  | -8.7  | 469 |
| 421 | MnP <sub>6</sub> (WO <sub>8</sub> ) <sub>3</sub>                 | trigonal     | 100% | -7.4  | 583 |
| 422 | MnPCO <sub>4</sub>                                               | orthorhombic | 60%  | -22.0 | 470 |
| 423 | MnPNO <sub>5</sub>                                               | orthorhombic | 90%  | -10.6 | 381 |
| 424 | MnPO <sub>4</sub>                                                | orthorhombic | 80%  | -8.2  | 452 |
| 425 | MnRe(CO) <sub>10</sub>                                           | monoclinic   | 70%  | -11.4 | 468 |
| 426 | MnSeO <sub>4</sub>                                               | orthorhombic | 70%  | -6.4  | 329 |
| 427 | MnSO <sub>6</sub>                                                | orthorhombic | 80%  | -8.4  | 484 |
| 428 | MnTeC <sub>5</sub> O <sub>6</sub> F <sub>5</sub>                 | orthorhombic | 70%  | -12.2 | 471 |
| 429 | MnTl(PO <sub>3</sub> ) <sub>3</sub>                              | orthorhombic | 60%  | -7.8  | 468 |
| 430 | MnV <sub>2</sub> (PO <sub>4</sub> ) <sub>3</sub>                 | trigonal     | 60%  | -0.4  | 648 |
| 431 | MnV <sub>2</sub> O <sub>8</sub>                                  | orthorhombic | 60%  | -5.9  | 617 |
| 432 | MnV <sub>3</sub> (PO <sub>4</sub> ) <sub>6</sub>                 | trigonal     | 70%  | -8.2  | 634 |
| 433 | MnV <sub>3</sub> Co <sub>2</sub> (PO <sub>4</sub> ) <sub>6</sub> | trigonal     | 60%  | -4.9  | 559 |
| 434 | MnV <sub>3</sub> Cu <sub>2</sub> (PO <sub>4</sub> ) <sub>6</sub> | trigonal     | 90%  | -1.2  | 649 |
| 435 | MnV <sub>3</sub> Ni <sub>2</sub> (PO <sub>4</sub> ) <sub>6</sub> | trigonal     | 60%  | -5.9  | 560 |
| 436 | MnV <sub>5</sub> (PO <sub>4</sub> ) <sub>6</sub>                 | trigonal     | 60%  | -4.0  | 584 |
| 437 | Mo(CO) <sub>6</sub>                                              | orthorhombic | 60%  | -22.8 | 593 |
| 438 | Mo(PO <sub>3</sub> ) <sub>4</sub>                                | orthorhombic | 90%  | -8.2  | 744 |
| 439 | Mo <sub>2</sub> (PO <sub>4</sub> ) <sub>3</sub>                  | monoclinic   | 80%  | -8.5  | 722 |
| 440 | Mo <sub>2</sub> C <sub>5</sub> N <sub>3</sub> O <sub>14</sub>    | orthorhombic | 90%  | -20.3 | 611 |
| 441 | Mo <sub>2</sub> P <sub>2</sub> O <sub>11</sub>                   | orthorhombic | 100% | -10.7 | 756 |
| 442 | Mo <sub>2</sub> P <sub>2</sub> O <sub>9</sub>                    | orthorhombic | 100% | -10.5 | 681 |
| 443 | Mo <sub>2</sub> P <sub>3</sub> O <sub>11</sub>                   | monoclinic   | 90%  | -10.8 | 765 |
| 444 | Mo <sub>2</sub> P <sub>3</sub> O <sub>13</sub>                   | monoclinic   | 100% | -9.8  | 719 |
| 445 | Mo <sub>2</sub> P <sub>4</sub> O <sub>15</sub>                   | monoclinic   | 100% | -9.4  | 729 |
| 446 | Mo <sub>2</sub> PO <sub>8</sub>                                  | monoclinic   | 80%  | -10.4 | 637 |
| 447 | Mo <sub>3</sub> (NO <sub>5</sub> ) <sub>2</sub>                  | orthorhombic | 80%  | -9.2  | 639 |
| 448 | Mo <sub>3</sub> (PO <sub>4</sub> ) <sub>4</sub>                  | monoclinic   | 90%  | -10.7 | 764 |
| 449 | Mo <sub>3</sub> O <sub>7</sub>                                   | orthorhombic | 90%  | -10.1 | 722 |
| 450 | Mo <sub>3</sub> P <sub>5</sub> Pb <sub>3</sub> O <sub>23</sub>   | orthorhombic | 60%  | -9.2  | 617 |
| 451 | Mo <sub>3</sub> PW <sub>9</sub> N <sub>3</sub> O <sub>40</sub>   | orthorhombic | 80%  | -15.7 | 803 |
| 452 | Mo <sub>4</sub> O <sub>11</sub>                                  | orthorhombic | 70%  | -10.4 | 671 |
| 453 | MoCl <sub>2</sub> O <sub>3</sub>                                 | orthorhombic | 70%  | -16.7 | 644 |
| 454 | MoN <sub>2</sub> Cl <sub>5</sub> O                               | orthorhombic | 60%  | -19.9 | 572 |
| 455 | MoO <sub>3</sub>                                                 | hexagonal    | 70%  | -7.9  | 628 |
| 456 | MoP <sub>2</sub> O <sub>7</sub>                                  | cubic        | 100% | -10.3 | 662 |

|     |                                                                                 |              |      |       |      |
|-----|---------------------------------------------------------------------------------|--------------|------|-------|------|
| 457 | MoPCl <sub>8</sub> O                                                            | orthorhombic | 80%  | -17.3 | 606  |
| 458 | MoPO <sub>5</sub>                                                               | orthorhombic | 100% | -10.8 | 603  |
| 459 | MoRhN <sub>5</sub> ClO <sub>4</sub>                                             | orthorhombic | 60%  | -22.3 | 653  |
| 460 | MoSO <sub>6</sub>                                                               | orthorhombic | 60%  | -0.3  | 813  |
| 461 | N <sub>2</sub> O                                                                | cubic        | 60%  | -17.6 | 366  |
| 462 | N <sub>2</sub> O <sub>3</sub> (Ferrimagnetic)                                   | orthorhombic | 70%  | -13.3 | 373  |
| 463 | N <sub>2</sub> O <sub>3</sub> (Antiferromagnetic)                               | orthorhombic | 70%  | -6.6  | 370  |
| 464 | N <sub>4</sub> O <sub>9</sub>                                                   | monoclinic   | 70%  | -4.7  | 485  |
| 465 | Na <sub>2</sub> FeSn(PO <sub>4</sub> ) <sub>3</sub>                             | monoclinic   | 80%  | -3.1  | 702  |
| 466 | Na <sub>2</sub> OsO <sub>7</sub>                                                | monoclinic   | 60%  | -7.3  | 644  |
| 467 | Na <sub>2</sub> OsO <sub>8</sub>                                                | monoclinic   | 60%  | -2.7  | 632  |
| 468 | Na <sub>2</sub> Pr <sub>4</sub> Br <sub>9</sub> NO                              | monoclinic   | 70%  | -18.8 | 1154 |
| 469 | Na <sub>3</sub> Be <sub>3</sub> B <sub>3</sub> P <sub>6</sub> O <sub>25</sub>   | cubic        | 70%  | -0.2  | 672  |
| 470 | Na <sub>8</sub> Al <sub>6</sub> Si <sub>6</sub> CO <sub>27</sub>                | trigonal     | 70%  | -2.7  | 578  |
| 471 | Na <sub>8</sub> Al <sub>6</sub> Si <sub>6</sub> O <sub>25</sub> (Band gap=4.30) | trigonal     | 70%  | -3.5  | 496  |
| 472 | Na <sub>8</sub> Al <sub>6</sub> Si <sub>6</sub> O <sub>25</sub> (Band gap=1.87) | trigonal     | 70%  | -3.5  | 492  |
| 473 | NaAlSiO <sub>4</sub>                                                            | cubic        | 60%  | -3.9  | 502  |
| 474 | NaB <sub>6</sub> S <sub>4</sub> (I <sub>3</sub> O <sub>4</sub> ) <sub>2</sub>   | orthorhombic | 70%  | -21.9 | 860  |
| 475 | NaBrO <sub>3</sub>                                                              | cubic        | 80%  | -24.3 | 684  |
| 476 | NaClO <sub>3</sub>                                                              | cubic        | 70%  | -2.4  | 677  |
| 477 | NaGePCO <sub>7</sub>                                                            | monoclinic   | 60%  | -1.2  | 683  |
| 478 | NaHfPCO <sub>7</sub>                                                            | monoclinic   | 60%  | -3.6  | 658  |
| 479 | NaMg(PO <sub>3</sub> ) <sub>3</sub>                                             | cubic        | 90%  | -0.7  | 688  |
| 480 | NaMn <sub>2</sub> FeAg(PO <sub>4</sub> ) <sub>3</sub>                           | monoclinic   | 60%  | -3.2  | 642  |
| 481 | NaMnH <sub>3</sub> (CO <sub>2</sub> ) <sub>3</sub>                              | cubic        | 60%  | -22.1 | 941  |
| 482 | NaMo <sub>2</sub> (PO <sub>4</sub> ) <sub>3</sub>                               | trigonal     | 80%  | -4.8  | 596  |
| 483 | NaMo <sub>2</sub> P <sub>2</sub> O <sub>9</sub>                                 | orthorhombic | 70%  | -2.2  | 670  |
| 484 | NaMo <sub>3</sub> NO <sub>10</sub>                                              | orthorhombic | 70%  | -6.2  | 579  |
| 485 | NaMo <sub>3</sub> O <sub>11</sub>                                               | orthorhombic | 70%  | -4.2  | 579  |
| 486 | NaNb <sub>4</sub> (PO <sub>4</sub> ) <sub>6</sub>                               | trigonal     | 80%  | -2.3  | 795  |
| 487 | NaNi <sub>4</sub> (P <sub>2</sub> O <sub>11</sub> ) <sub>2</sub>                | monoclinic   | 90%  | -8.6  | 646  |
| 488 | NaSbPCO <sub>7</sub>                                                            | monoclinic   | 60%  | -3.2  | 691  |
| 489 | NaSn <sub>2</sub> (PO <sub>4</sub> ) <sub>3</sub>                               | trigonal     | 80%  | -2.8  | 688  |
| 490 | NaTi <sub>2</sub> O <sub>4</sub>                                                | orthorhombic | 60%  | -33.1 | 613  |
| 491 | NaW <sub>2</sub> (Br <sub>3</sub> O) <sub>2</sub>                               | orthorhombic | 60%  | -17.9 | 594  |
| 492 | NaZn(PO <sub>3</sub> ) <sub>3</sub>                                             | cubic        | 80%  | -1.2  | 726  |
| 493 | NaZr <sub>2</sub> (AsO <sub>4</sub> ) <sub>3</sub>                              | trigonal     | 70%  | -3.0  | 683  |

|     |                                              |              |      |       |     |
|-----|----------------------------------------------|--------------|------|-------|-----|
| 494 | $\text{NaZr}_2(\text{PO}_4)_3$               | trigonal     | 100% | -0.2  | 756 |
| 495 | $\text{Nb}(\text{Br}_3\text{O})_2$           | orthorhombic | 60%  | -9.7  | 712 |
| 496 | $\text{Nb}(\text{PO}_3)_4$                   | orthorhombic | 90%  | -8.8  | 739 |
| 497 | $\text{Nb}_{12}\text{WO}_{33}$               | monoclinic   | 90%  | -4.4  | 688 |
| 498 | $\text{Nb}_2(\text{PO}_4)_3$                 | trigonal     | 90%  | -8.3  | 783 |
| 499 | $\text{Nb}_2\text{Ge}_2\text{O}_7$           | monoclinic   | 70%  | -0.1  | 656 |
| 500 | $\text{Nb}_2\text{P}_2\text{O}_9$            | orthorhombic | 90%  | -9.7  | 661 |
| 501 | $\text{Nb}_2\text{S}_4\text{Cl}_9\text{O}_5$ | orthorhombic | 70%  | -15.1 | 617 |
| 502 | $\text{Nb}_3(\text{Cl}_3\text{O}_4)_2$       | cubic        | 80%  | -8.5  | 727 |
| 503 | $\text{Nb}_3(\text{OF})_5$                   | orthorhombic | 70%  | -11.2 | 635 |
| 504 | $\text{Nb}_3\text{Al}(\text{PO}_4)_6$        | trigonal     | 90%  | -7.5  | 691 |
| 505 | $\text{Nb}_3\text{ClO}_7$                    | orthorhombic | 70%  | -6.4  | 594 |
| 506 | $\text{Nb}_3\text{Co}(\text{PO}_4)_6$        | trigonal     | 80%  | -8.0  | 696 |
| 507 | $\text{Nb}_3\text{Cr}(\text{PO}_4)_6$        | trigonal     | 90%  | -8.8  | 724 |
| 508 | $\text{Nb}_3\text{Fe}(\text{PO}_4)_6$        | trigonal     | 80%  | -8.1  | 697 |
| 509 | $\text{Nb}_3\text{Ni}(\text{PO}_4)_6$        | trigonal     | 80%  | -7.7  | 696 |
| 510 | $\text{Nb}_3\text{O}_7\text{F}$              | orthorhombic | 70%  | -7.1  | 580 |
| 511 | $\text{Nb}_3\text{P}_6\text{WO}_{24}$        | trigonal     | 100% | -8.1  | 711 |
| 512 | $\text{Nb}_3\text{Sb}(\text{PO}_4)_6$        | trigonal     | 90%  | -7.9  | 731 |
| 513 | $\text{Nb}_3\text{V}(\text{PO}_4)_6$         | trigonal     | 90%  | -8.2  | 721 |
| 514 | $\text{Nb}_8\text{P}_{15}\text{O}_{56}$      | trigonal     | 100% | -4.4  | 802 |
| 515 | $\text{Nb}_9\text{AsO}_{25}$                 | monoclinic   | 70%  | -3.3  | 591 |
| 516 | $\text{Nb}_9\text{PO}_{25}$                  | monoclinic   | 60%  | -5.4  | 590 |
| 517 | $\text{NbCr}_2\text{Fe}_3(\text{PO}_4)_6$    | trigonal     | 90%  | -3.1  | 691 |
| 518 | $\text{NbCr}_3(\text{PO}_4)_6$               | trigonal     | 90%  | -8.6  | 730 |
| 519 | $\text{NbFe}_3(\text{PO}_4)_6$               | trigonal     | 80%  | -8.2  | 697 |
| 520 | $\text{NbFe}_3\text{Co}_2(\text{PO}_4)_6$    | trigonal     | 70%  | -6.3  | 611 |
| 521 | $\text{NbFe}_3\text{Cu}_2(\text{PO}_4)_6$    | trigonal     | 90%  | -4.2  | 626 |
| 522 | $\text{NbFe}_5(\text{PO}_4)_6$               | trigonal     | 70%  | -6.2  | 618 |
| 523 | $\text{NbI}_3\text{O}$                       | monoclinic   | 70%  | -16.9 | 594 |
| 524 | $\text{NbIO}_2$                              | orthorhombic | 70%  | -12.4 | 674 |
| 525 | $\text{NbNi}_5(\text{PO}_4)_6$               | trigonal     | 70%  | -7.1  | 629 |
| 526 | $\text{NbP}_2\text{O}_7$                     | cubic        | 100% | -10.6 | 673 |
| 527 | $\text{NbP}_6(\text{WO}_8)_3$                | trigonal     | 100% | -7.4  | 582 |
| 528 | $\text{NbPCl}_8\text{O}$                     | orthorhombic | 70%  | -16.8 | 592 |
| 529 | $\text{NbPO}_5$                              | orthorhombic | 100% | -11.5 | 618 |
| 530 | $\text{NbS}_2\text{NO}_9$                    | orthorhombic | 80%  | -7.7  | 679 |

|     |                                                                  |              |      |       |      |
|-----|------------------------------------------------------------------|--------------|------|-------|------|
| 531 | NbV <sub>2</sub> Fe <sub>3</sub> (PO <sub>4</sub> ) <sub>6</sub> | trigonal     | 60%  | -3.3  | 629  |
| 532 | NbV <sub>2</sub> O <sub>7</sub>                                  | cubic        | 90%  | -8.4  | 746  |
| 533 | NbV <sub>3</sub> (PO <sub>4</sub> ) <sub>6</sub>                 | trigonal     | 90%  | -8.1  | 714  |
| 534 | NbV <sub>3</sub> Cr <sub>2</sub> (PO <sub>4</sub> ) <sub>6</sub> | trigonal     | 90%  | -0.7  | 693  |
| 535 | NbV <sub>3</sub> Cu <sub>2</sub> (PO <sub>4</sub> ) <sub>6</sub> | trigonal     | 90%  | -3.0  | 700  |
| 536 | NbV <sub>3</sub> Fe <sub>2</sub> (PO <sub>4</sub> ) <sub>6</sub> | trigonal     | 60%  | -6.0  | 623  |
| 537 | NbV <sub>5</sub> (PO <sub>4</sub> ) <sub>6</sub>                 | trigonal     | 70%  | -5.0  | 645  |
| 538 | NCIO <sub>4</sub>                                                | orthorhombic | 60%  | -6.6  | 491  |
| 539 | Nd(CIO) <sub>3</sub>                                             | orthorhombic | 60%  | -15.3 | 1192 |
| 540 | Nd <sub>2</sub> Zr <sub>3</sub> (MoO <sub>4</sub> ) <sub>9</sub> | trigonal     | 80%  | -3.9  | 1113 |
| 541 | NdGaO <sub>3</sub>                                               | cubic        | 60%  | -12.0 | 1009 |
| 542 | NdSeClO <sub>3</sub>                                             | orthorhombic | 60%  | -9.2  | 1044 |
| 543 | Ni(CO) <sub>4</sub>                                              | cubic        | 80%  | -18.6 | 640  |
| 544 | Ni(PO <sub>3</sub> ) <sub>4</sub>                                | orthorhombic | 80%  | -1.2  | 602  |
| 545 | Ni <sub>2</sub> P <sub>2</sub> O <sub>9</sub>                    | orthorhombic | 70%  | -9.4  | 475  |
| 546 | Ni <sub>3</sub> (P <sub>2</sub> O <sub>7</sub> ) <sub>2</sub>    | orthorhombic | 80%  | -9.2  | 520  |
| 547 | Ni <sub>3</sub> (PO <sub>4</sub> ) <sub>4</sub>                  | monoclinic   | 100% | -9.0  | 529  |
| 548 | Ni <sub>3</sub> P <sub>4</sub> O <sub>15</sub>                   | orthorhombic | 90%  | -9.9  | 552  |
| 549 | NiAs <sub>3</sub> H <sub>3</sub> OF <sub>18</sub>                | orthorhombic | 70%  | -13.3 | 636  |
| 550 | NiGeH <sub>12</sub> (OF) <sub>6</sub>                            | trigonal     | 80%  | -22.3 | 652  |
| 551 | NiH <sub>12</sub> S <sub>2</sub> O <sub>9</sub>                  | orthorhombic | 60%  | -29.8 | 569  |
| 552 | NiMoP <sub>2</sub> O <sub>9</sub>                                | orthorhombic | 90%  | -10.1 | 660  |
| 553 | NiP <sub>2</sub> O <sub>7</sub>                                  | monoclinic   | 90%  | -7.8  | 429  |
| 554 | NiP <sub>2</sub> WO <sub>9</sub>                                 | orthorhombic | 70%  | -9.7  | 581  |
| 555 | NiP <sub>6</sub> (WO <sub>8</sub> ) <sub>3</sub>                 | trigonal     | 90%  | -7.0  | 607  |
| 556 | NiPNO <sub>10</sub>                                              | orthorhombic | 80%  | -6.8  | 515  |
| 557 | NiPNO <sub>5</sub>                                               | orthorhombic | 90%  | -8.5  | 348  |
| 558 | NiPO <sub>4</sub>                                                | orthorhombic | 100% | -8.9  | 405  |
| 559 | NiS <sub>2</sub> O <sub>9</sub>                                  | orthorhombic | 80%  | -9.1  | 540  |
| 560 | NiSnP <sub>2</sub> O <sub>9</sub>                                | orthorhombic | 80%  | -8.7  | 545  |
| 561 | NpNi(OF <sub>2</sub> ) <sub>3</sub>                              | monoclinic   | 70%  | -5.3  | 1076 |
| 562 | NpNO <sub>5</sub>                                                | monoclinic   | 90%  | -8.0  | 987  |
| 563 | NpPO <sub>4</sub> F                                              | orthorhombic | 70%  | -5.2  | 967  |
| 564 | Os <sub>3</sub> O                                                | cubic        | 70%  | -2.3  | 296  |
| 565 | Os <sub>5</sub> Pd(CO) <sub>16</sub>                             | orthorhombic | 70%  | -17.0 | 630  |
| 566 | Os <sub>6</sub> C <sub>17</sub> SO <sub>17</sub>                 | orthorhombic | 70%  | -18.0 | 579  |
| 567 | Os <sub>6</sub> C <sub>19</sub> O <sub>20</sub>                  | orthorhombic | 70%  | -18.4 | 598  |



|     |                                                                  |              |      |       |      |
|-----|------------------------------------------------------------------|--------------|------|-------|------|
| 568 | Os <sub>7</sub> C <sub>19</sub> SO <sub>19</sub>                 | monoclinic   | 60%  | -17.4 | 611  |
| 569 | OsBr <sub>2</sub> N <sub>4</sub> ClO <sub>2</sub>                | orthorhombic | 60%  | -9.1  | 432  |
| 570 | OsOF <sub>5</sub> (Pnma)                                         | orthorhombic | 60%  | -9.4  | 460  |
| 571 | OsOF <sub>5</sub> (Pna2_1)                                       | orthorhombic | 60%  | -9.4  | 457  |
| 572 | P(W <sub>3</sub> O <sub>10</sub> ) <sub>4</sub>                  | cubic        | 100% | -13.5 | 801  |
| 573 | P <sub>2</sub> W <sub>2</sub> O <sub>11</sub>                    | orthorhombic | 70%  | -10.5 | 639  |
| 574 | P <sub>2</sub> W <sub>2</sub> O <sub>9</sub>                     | orthorhombic | 90%  | -10.5 | 546  |
| 575 | P <sub>2</sub> W <sub>3</sub> O <sub>13</sub>                    | orthorhombic | 70%  | -11.0 | 536  |
| 576 | P <sub>2</sub> W <sub>5</sub> O <sub>19</sub>                    | monoclinic   | 70%  | -4.5  | 582  |
| 577 | P <sub>2</sub> WO <sub>7</sub>                                   | cubic        | 100% | -11.5 | 543  |
| 578 | P <sub>2</sub> WO <sub>8</sub>                                   | orthorhombic | 70%  | -7.3  | 681  |
| 579 | P <sub>3</sub> (WO <sub>6</sub> ) <sub>2</sub>                   | trigonal     | 100% | -6.5  | 625  |
| 580 | P <sub>3</sub> N <sub>6</sub> O <sub>7</sub>                     | monoclinic   | 70%  | -15.4 | 484  |
| 581 | P <sub>3</sub> SN <sub>4</sub> Cl <sub>5</sub> O                 | orthorhombic | 70%  | -17.1 | 489  |
| 582 | P <sub>4</sub> WO <sub>12</sub>                                  | orthorhombic | 90%  | -9.4  | 676  |
| 583 | PBr <sub>3</sub> O                                               | orthorhombic | 70%  | -12.0 | 485  |
| 584 | PCl <sub>3</sub> O                                               | orthorhombic | 80%  | -13.7 | 518  |
| 585 | PClOF <sub>2</sub>                                               | orthorhombic | 80%  | -15.6 | 534  |
| 586 | Pd <sub>2</sub> O                                                | cubic        | 70%  | -16.8 | 224  |
| 587 | PNO <sub>3</sub>                                                 | orthorhombic | 80%  | -13.3 | 460  |
| 588 | PO <sub>3</sub>                                                  | orthorhombic | 90%  | -13.0 | 552  |
| 589 | Pr <sub>2</sub> (MoO <sub>4</sub> ) <sub>3</sub>                 | orthorhombic | 80%  | -14.6 | 1171 |
| 590 | Pr <sub>2</sub> Hf <sub>3</sub> (MoO <sub>4</sub> ) <sub>9</sub> | trigonal     | 100% | -13.5 | 1115 |
| 591 | PrC <sub>19</sub> S <sub>6</sub> N <sub>9</sub> O <sub>2</sub>   | monoclinic   | 60%  | -18.3 | 1180 |
| 592 | PS <sub>2</sub> N(Cl <sub>3</sub> O <sub>2</sub> ) <sub>2</sub>  | orthorhombic | 70%  | -14.7 | 649  |
| 593 | Pt <sub>2</sub> O                                                | cubic        | 60%  | -15.7 | 218  |
| 594 | PW <sub>12</sub> O <sub>43</sub>                                 | cubic        | 80%  | -9.7  | 820  |
| 595 | PW <sub>5</sub> O <sub>17</sub>                                  | monoclinic   | 60%  | -9.5  | 572  |
| 596 | PWO <sub>4</sub>                                                 | orthorhombic | 70%  | -9.1  | 572  |
| 597 | PWO <sub>5</sub>                                                 | orthorhombic | 90%  | -12.0 | 633  |
| 598 | Rb <sub>2</sub> Cd <sub>2</sub> (MoO <sub>4</sub> ) <sub>3</sub> | cubic        | 60%  | -8.2  | 1210 |
| 599 | Rb <sub>2</sub> UH <sub>2</sub> (SeO <sub>5</sub> ) <sub>2</sub> | orthorhombic | 60%  | -1.3  | 1050 |
| 600 | Rb <sub>3</sub> GaP <sub>6</sub> (HO <sub>3</sub> ) <sub>6</sub> | trigonal     | 60%  | -8.2  | 1091 |
| 601 | Rb <sub>3</sub> P(W <sub>3</sub> O <sub>10</sub> ) <sub>4</sub>  | cubic        | 80%  | -5.4  | 1112 |
| 602 | Rb <sub>4</sub> Te <sub>2</sub> S <sub>8</sub> O <sub>15</sub>   | orthorhombic | 60%  | -2.6  | 1255 |
| 603 | RbAsOF <sub>5</sub>                                              | orthorhombic | 70%  | -19.8 | 1133 |
| 604 | RbMo <sub>2</sub> P <sub>3</sub> O <sub>13</sub>                 | monoclinic   | 80%  | -4.6  | 1119 |

|     |                                                                                                 |              |     |       |      |
|-----|-------------------------------------------------------------------------------------------------|--------------|-----|-------|------|
| 605 | RbP(OF) <sub>2</sub>                                                                            | orthorhombic | 70% | -0.3  | 1088 |
| 606 | Re(Cl <sub>2</sub> O) <sub>2</sub>                                                              | orthorhombic | 70% | -13.2 | 427  |
| 607 | Re <sub>2</sub> C <sub>3</sub> (ClO <sub>2</sub> ) <sub>3</sub>                                 | orthorhombic | 60% | -16.2 | 398  |
| 608 | Re <sub>3</sub> S <sub>4</sub> O <sub>9</sub>                                                   | trigonal     | 80% | -16.6 | 631  |
| 609 | Re <sub>3</sub> Se <sub>4</sub> O <sub>3</sub>                                                  | cubic        | 80% | -16.0 | 648  |
| 610 | Re <sub>3</sub> Se <sub>4</sub> O <sub>8</sub> F                                                | monoclinic   | 70% | -10.0 | 668  |
| 611 | ReBi <sub>3</sub> O <sub>8</sub>                                                                | cubic        | 70% | -16.6 | 683  |
| 612 | ReH <sub>22</sub> C <sub>4</sub> S <sub>4</sub> N <sub>8</sub> Cl <sub>8</sub> O <sub>3</sub>   | orthorhombic | 60% | -9.9  | 853  |
| 613 | ReN <sub>2</sub> (OF <sub>4</sub> ) <sub>2</sub>                                                | orthorhombic | 70% | -9.3  | 423  |
| 614 | RePCl <sub>8</sub> O                                                                            | orthorhombic | 80% | -12.1 | 440  |
| 615 | ReWO <sub>6</sub>                                                                               | cubic        | 90% | -1.0  | 598  |
| 616 | RhN <sub>3</sub> Cl <sub>6</sub> O                                                              | orthorhombic | 60% | -18.1 | 443  |
| 617 | RhWN <sub>5</sub> ClO <sub>4</sub>                                                              | orthorhombic | 70% | -15.2 | 552  |
| 618 | Ru(NO <sub>2</sub> ) <sub>6</sub>                                                               | monoclinic   | 60% | -6.6  | 500  |
| 619 | Ru <sub>3</sub> C <sub>10</sub> I <sub>2</sub> O <sub>9</sub>                                   | orthorhombic | 70% | -13.7 | 471  |
| 620 | RuN <sub>3</sub> Cl <sub>3</sub> O                                                              | orthorhombic | 60% | -17.2 | 457  |
| 621 | RuN <sub>3</sub> Cl <sub>5</sub> O                                                              | orthorhombic | 60% | -19.2 | 449  |
| 622 | RuN <sub>4</sub> Cl <sub>3</sub> O <sub>2</sub>                                                 | orthorhombic | 60% | -16.1 | 448  |
| 623 | RuN <sub>6</sub> Cl <sub>3</sub> O <sub>2</sub>                                                 | orthorhombic | 60% | -20.6 | 453  |
| 624 | RuSN <sub>4</sub> (ClO) <sub>2</sub>                                                            | orthorhombic | 60% | -20.8 | 449  |
| 625 | S(NO <sub>2</sub> ) <sub>2</sub>                                                                | orthorhombic | 70% | -13.4 | 464  |
| 626 | S <sub>2</sub> N(O <sub>2</sub> F) <sub>2</sub>                                                 | monoclinic   | 60% | -12.3 | 411  |
| 627 | Sb(PO <sub>3</sub> ) <sub>4</sub>                                                               | orthorhombic | 90% | -7.3  | 582  |
| 628 | Sb <sub>2</sub> P <sub>2</sub> O <sub>9</sub>                                                   | orthorhombic | 90% | -3.8  | 490  |
| 629 | Sb <sub>2</sub> Te <sub>3</sub> MoC <sub>4</sub> (OF <sub>3</sub> ) <sub>4</sub>                | orthorhombic | 60% | -10.2 | 736  |
| 630 | Sb <sub>2</sub> Te <sub>3</sub> WC <sub>4</sub> (OF <sub>3</sub> ) <sub>4</sub> (Ferromagnetic) | orthorhombic | 70% | -9.2  | 945  |
| 631 | Sb <sub>2</sub> Te <sub>3</sub> WC <sub>4</sub> (OF <sub>3</sub> ) <sub>4</sub> (Non-magnetic)  | orthorhombic | 60% | -9.0  | 726  |
| 632 | Sb <sub>3</sub> IO <sub>4</sub>                                                                 | orthorhombic | 60% | -14.2 | 406  |
| 633 | Sb <sub>3</sub> P <sub>6</sub> WO <sub>24</sub>                                                 | trigonal     | 90% | -4.4  | 668  |
| 634 | Sb <sub>4</sub> O <sub>5</sub> F <sub>2</sub>                                                   | orthorhombic | 60% | -7.2  | 395  |
| 635 | Sb <sub>8</sub> Cl <sub>2</sub> O <sub>15</sub>                                                 | monoclinic   | 70% | -9.8  | 287  |
| 636 | SbH <sub>8</sub> C <sub>2</sub> S <sub>2</sub> Br <sub>3</sub> N <sub>4</sub> O                 | orthorhombic | 60% | -20.7 | 585  |
| 637 | SbO <sub>2</sub>                                                                                | hexagonal    | 60% | -11.4 | 413  |
| 638 | SbOF                                                                                            | orthorhombic | 60% | -8.7  | 246  |
| 639 | SbP <sub>6</sub> (WO <sub>8</sub> ) <sub>3</sub>                                                | trigonal     | 90% | -3.8  | 636  |
| 640 | SbPC <sub>3</sub> Cl <sub>5</sub> O                                                             | orthorhombic | 60% | -15.8 | 456  |
| 641 | SbPCl <sub>8</sub> O                                                                            | orthorhombic | 80% | -12.4 | 464  |

|     |                                                               |              |      |       |      |
|-----|---------------------------------------------------------------|--------------|------|-------|------|
| 642 | SbS <sub>8</sub> Cl <sub>5</sub> O                            | orthorhombic | 60%  | -17.1 | 646  |
| 643 | SbTeClO <sub>3</sub>                                          | orthorhombic | 60%  | -11.6 | 402  |
| 644 | Se <sub>2</sub> S <sub>8</sub> N <sub>4</sub> O <sub>15</sub> | orthorhombic | 90%  | -12.9 | 624  |
| 645 | Si(Sn <sub>3</sub> O <sub>4</sub> ) <sub>2</sub>              | hexagonal    | 70%  | -14.4 | 592  |
| 646 | Si <sub>16</sub> O <sub>32</sub> F                            | monoclinic   | 70%  | -17.7 | 551  |
| 647 | Si <sub>3</sub> (Cl <sub>4</sub> O) <sub>2</sub>              | orthorhombic | 70%  | -16.3 | 576  |
| 648 | Si <sub>9</sub> C <sub>4</sub> NO <sub>18</sub>               | monoclinic   | 80%  | -18.3 | 786  |
| 649 | SiMoP <sub>3</sub> O <sub>11</sub>                            | trigonal     | 100% | -4.3  | 736  |
| 650 | SiN <sub>4</sub> (OF <sub>2</sub> ) <sub>3</sub>              | hexagonal    | 60%  | -12.4 | 580  |
| 651 | SiP <sub>3</sub> RuO <sub>11</sub>                            | trigonal     | 80%  | -3.1  | 751  |
| 652 | Sm(ReO <sub>5</sub> ) <sub>3</sub>                            | orthorhombic | 100% | -13.6 | 1085 |
| 653 | SmAgO <sub>2</sub>                                            | hexagonal    | 60%  | -13.2 | 981  |
| 654 | SmRe <sub>3</sub> O <sub>16</sub>                             | orthorhombic | 100% | -13.9 | 1083 |
| 655 | SmSeClO <sub>3</sub>                                          | orthorhombic | 90%  | -9.8  | 1002 |
| 656 | Sn(PO <sub>3</sub> ) <sub>4</sub>                             | orthorhombic | 80%  | -6.6  | 589  |
| 657 | Sn <sub>2</sub> C <sub>6</sub> N <sub>2</sub> O <sub>17</sub> | orthorhombic | 90%  | -17.7 | 600  |
| 658 | Sn <sub>3</sub> (OF) <sub>2</sub>                             | orthorhombic | 80%  | -17.3 | 415  |
| 659 | SN <sub>4</sub> O <sub>5</sub>                                | orthorhombic | 70%  | -13.1 | 475  |
| 660 | Sn <sub>4</sub> P <sub>2</sub> O <sub>9</sub>                 | orthorhombic | 70%  | -6.9  | 405  |
| 661 | Sn <sub>5</sub> P <sub>6</sub> O <sub>25</sub>                | trigonal     | 70%  | -2.8  | 536  |
| 662 | Sn <sub>6</sub> P <sub>3</sub> NO <sub>14</sub>               | orthorhombic | 80%  | -15.3 | 415  |
| 663 | SnH <sub>4</sub> (Cl <sub>2</sub> O) <sub>2</sub>             | orthorhombic | 60%  | -20.5 | 550  |
| 664 | SnN <sub>2</sub> Cl <sub>4</sub> O                            | orthorhombic | 70%  | -11.1 | 417  |
| 665 | SnO <sub>2</sub>                                              | hexagonal    | 60%  | -14.3 | 398  |
| 666 | SNO <sub>3</sub> F                                            | orthorhombic | 60%  | -13.0 | 467  |
| 667 | SnP <sub>6</sub> (WO <sub>8</sub> ) <sub>3</sub>              | trigonal     | 90%  | -3.4  | 601  |
| 668 | SnPClO <sub>2</sub>                                           | orthorhombic | 70%  | -10.9 | 438  |
| 669 | SnPO <sub>4</sub>                                             | orthorhombic | 90%  | -3.8  | 473  |
| 670 | SnWO <sub>4</sub>                                             | cubic        | 90%  | -19.8 | 489  |
| 671 | Sr <sub>2</sub> V <sub>2</sub> OF <sub>10</sub>               | orthorhombic | 60%  | -16.7 | 1173 |
| 672 | SrBr <sub>2</sub> O                                           | orthorhombic | 70%  | -26.8 | 1158 |
| 673 | SrCd(IO <sub>2</sub> ) <sub>4</sub>                           | orthorhombic | 70%  | -23.5 | 1197 |
| 674 | SrI <sub>2</sub> O                                            | orthorhombic | 60%  | -25.9 | 1135 |
| 675 | SrIO                                                          | orthorhombic | 60%  | -25.2 | 1139 |
| 676 | SrMn <sub>2</sub> O <sub>11</sub>                             | cubic        | 70%  | -1.9  | 1133 |
| 677 | SrP <sub>3</sub> NO <sub>12</sub>                             | orthorhombic | 60%  | -7.0  | 1127 |
| 678 | Ta(PO <sub>4</sub> ) <sub>2</sub>                             | orthorhombic | 90%  | -10.4 | 643  |

|     |                                                                   |              |      |       |      |
|-----|-------------------------------------------------------------------|--------------|------|-------|------|
| 679 | Ta <sub>12</sub> MoO <sub>33</sub>                                | monoclinic   | 60%  | -4.1  | 709  |
| 680 | Ta <sub>2</sub> Cd(P <sub>2</sub> O <sub>7</sub> ) <sub>3</sub>   | orthorhombic | 80%  | -10.9 | 636  |
| 681 | Ta <sub>2</sub> W <sub>2</sub> O <sub>11</sub>                    | monoclinic   | 90%  | -14.9 | 484  |
| 682 | Ta <sub>3</sub> Sb(PO <sub>4</sub> ) <sub>6</sub>                 | trigonal     | 90%  | -7.6  | 621  |
| 683 | Ta <sub>7</sub> (P <sub>2</sub> O <sub>7</sub> ) <sub>8</sub>     | trigonal     | 90%  | -1.3  | 710  |
| 684 | TaAsO <sub>5</sub>                                                | orthorhombic | 60%  | -9.9  | 607  |
| 685 | TaNbO <sub>5</sub>                                                | orthorhombic | 90%  | -12.6 | 688  |
| 686 | TaNiP <sub>2</sub> O <sub>9</sub>                                 | orthorhombic | 70%  | -9.9  | 562  |
| 687 | TaO <sub>3</sub>                                                  | cubic        | 90%  | -4.5  | 522  |
| 688 | TaP <sub>2</sub> O <sub>7</sub>                                   | cubic        | 100% | -10.7 | 544  |
| 689 | TaSCl <sub>7</sub> O                                              | orthorhombic | 80%  | -13.6 | 547  |
| 690 | Tb <sub>2</sub> (MoO <sub>4</sub> ) <sub>3</sub>                  | orthorhombic | 90%  | -18.8 | 1181 |
| 691 | Tb <sub>2</sub> (SO <sub>4</sub> ) <sub>3</sub>                   | orthorhombic | 80%  | -8.8  | 1089 |
| 692 | Tb <sub>2</sub> (WO <sub>4</sub> ) <sub>3</sub>                   | orthorhombic | 100% | -19.9 | 1129 |
| 693 | TbSeClO <sub>3</sub>                                              | orthorhombic | 90%  | -9.7  | 996  |
| 694 | TcBi <sub>3</sub> O <sub>8</sub>                                  | cubic        | 70%  | -17.0 | 683  |
| 695 | Te <sub>2</sub> W(NO <sub>4</sub> ) <sub>2</sub>                  | monoclinic   | 70%  | -5.6  | 634  |
| 696 | Te <sub>3</sub> C <sub>2</sub> S <sub>2</sub> (OF) <sub>6</sub>   | monoclinic   | 60%  | -4.9  | 464  |
| 697 | Te <sub>3</sub> H <sub>4</sub> (NO <sub>6</sub> ) <sub>2</sub>    | orthorhombic | 70%  | -1.4  | 581  |
| 698 | Te <sub>3</sub> Mo <sub>5</sub> O <sub>18</sub>                   | monoclinic   | 80%  | -0.4  | 723  |
| 699 | Te <sub>3</sub> W <sub>5</sub> O <sub>18</sub>                    | monoclinic   | 70%  | -4.4  | 680  |
| 700 | Te <sub>4</sub> As <sub>2</sub> S(OF <sub>6</sub> ) <sub>2</sub>  | orthorhombic | 80%  | -9.1  | 494  |
| 701 | Th <sub>2</sub> N <sub>7</sub> OF <sub>15</sub>                   | cubic        | 60%  | -17.0 | 1307 |
| 702 | Th <sub>2</sub> P <sub>3</sub> O <sub>13</sub>                    | monoclinic   | 60%  | -6.9  | 1095 |
| 703 | Ti(PO <sub>3</sub> ) <sub>4</sub>                                 | orthorhombic | 60%  | -0.5  | 667  |
| 704 | Ti(PO <sub>4</sub> ) <sub>2</sub>                                 | monoclinic   | 80%  | -16.9 | 608  |
| 705 | Ti <sub>2</sub> C <sub>2</sub> O <sub>9</sub>                     | orthorhombic | 60%  | -10.2 | 596  |
| 706 | Ti <sub>2</sub> Cu(PO <sub>4</sub> ) <sub>3</sub>                 | trigonal     | 60%  | -0.7  | 554  |
| 707 | Ti <sub>2</sub> Sb(PO <sub>4</sub> ) <sub>3</sub>                 | trigonal     | 60%  | -5.2  | 601  |
| 708 | Ti <sub>2</sub> Sn(PO <sub>4</sub> ) <sub>3</sub>                 | trigonal     | 70%  | -3.9  | 657  |
| 709 | Ti <sub>3</sub> Co <sub>2</sub> P <sub>6</sub> WO <sub>24</sub>   | trigonal     | 60%  | -5.1  | 636  |
| 710 | Ti <sub>3</sub> Co <sub>2</sub> Te(PO <sub>4</sub> ) <sub>6</sub> | trigonal     | 60%  | -5.4  | 602  |
| 711 | Ti <sub>3</sub> CoSn <sub>2</sub> (PO <sub>4</sub> ) <sub>6</sub> | trigonal     | 70%  | -4.5  | 657  |
| 712 | Ti <sub>3</sub> Cr(PO <sub>4</sub> ) <sub>6</sub>                 | trigonal     | 80%  | -7.9  | 676  |
| 713 | Ti <sub>3</sub> Cr <sub>2</sub> Fe(PO <sub>4</sub> ) <sub>6</sub> | trigonal     | 70%  | -0.2  | 695  |
| 714 | Ti <sub>3</sub> Cr <sub>2</sub> Sb(PO <sub>4</sub> ) <sub>6</sub> | trigonal     | 80%  | -0.7  | 723  |
| 715 | Ti <sub>3</sub> Cr <sub>2</sub> Sn(PO <sub>4</sub> ) <sub>6</sub> | trigonal     | 80%  | -0.3  | 728  |

|     |                                                                                 |            |      |       |     |
|-----|---------------------------------------------------------------------------------|------------|------|-------|-----|
| 716 | Ti <sub>3</sub> CrSb <sub>2</sub> (PO <sub>4</sub> ) <sub>6</sub>               | trigonal   | 70%  | -5.9  | 645 |
| 717 | Ti <sub>3</sub> CrSn <sub>2</sub> (PO <sub>4</sub> ) <sub>6</sub>               | trigonal   | 60%  | -5.0  | 697 |
| 718 | Ti <sub>3</sub> Cu <sub>2</sub> P <sub>6</sub> WO <sub>24</sub>                 | trigonal   | 90%  | -2.8  | 661 |
| 719 | Ti <sub>3</sub> Cu <sub>2</sub> Sb(PO <sub>4</sub> ) <sub>6</sub>               | trigonal   | 80%  | -2.9  | 557 |
| 720 | Ti <sub>3</sub> Cu <sub>2</sub> Sn(PO <sub>4</sub> ) <sub>6</sub>               | trigonal   | 80%  | -2.9  | 582 |
| 721 | Ti <sub>3</sub> Cu <sub>2</sub> Te(PO <sub>4</sub> ) <sub>6</sub>               | trigonal   | 80%  | -3.0  | 560 |
| 722 | Ti <sub>3</sub> CuSn <sub>2</sub> (PO <sub>4</sub> ) <sub>6</sub>               | trigonal   | 60%  | -5.5  | 596 |
| 723 | Ti <sub>3</sub> Fe <sub>2</sub> P <sub>6</sub> WO <sub>24</sub>                 | trigonal   | 60%  | -6.1  | 581 |
| 724 | Ti <sub>3</sub> Fe <sub>2</sub> Sb(PO <sub>4</sub> ) <sub>6</sub>               | trigonal   | 60%  | -6.1  | 689 |
| 725 | Ti <sub>3</sub> Fe <sub>2</sub> Sn(PO <sub>4</sub> ) <sub>6</sub>               | trigonal   | 60%  | -6.2  | 683 |
| 726 | Ti <sub>3</sub> Fe <sub>2</sub> Te(PO <sub>4</sub> ) <sub>6</sub>               | trigonal   | 70%  | -6.4  | 686 |
| 727 | Ti <sub>3</sub> FeCu <sub>2</sub> (PO <sub>4</sub> ) <sub>6</sub>               | trigonal   | 80%  | -0.8  | 712 |
| 728 | Ti <sub>3</sub> FeSb <sub>2</sub> (PO <sub>4</sub> ) <sub>6</sub>               | trigonal   | 60%  | -5.0  | 694 |
| 729 | Ti <sub>3</sub> FeSn <sub>2</sub> (PO <sub>4</sub> ) <sub>6</sub>               | trigonal   | 60%  | -5.6  | 746 |
| 730 | Ti <sub>3</sub> Mn <sub>2</sub> Nb(PO <sub>4</sub> ) <sub>6</sub>               | trigonal   | 70%  | -0.7  | 718 |
| 731 | Ti <sub>3</sub> Mn <sub>2</sub> P <sub>6</sub> WO <sub>24</sub>                 | trigonal   | 70%  | -1.9  | 666 |
| 732 | Ti <sub>3</sub> MnCr(PO <sub>4</sub> ) <sub>6</sub>                             | trigonal   | 70%  | -3.1  | 728 |
| 733 | Ti <sub>3</sub> MnSb <sub>2</sub> (PO <sub>4</sub> ) <sub>6</sub>               | trigonal   | 60%  | -3.8  | 608 |
| 734 | Ti <sub>3</sub> MnSn <sub>2</sub> (PO <sub>4</sub> ) <sub>6</sub>               | trigonal   | 60%  | -3.6  | 654 |
| 735 | Ti <sub>3</sub> Nb <sub>2</sub> Cr(PO <sub>4</sub> ) <sub>6</sub>               | trigonal   | 80%  | -1.9  | 684 |
| 736 | Ti <sub>3</sub> NbCo <sub>2</sub> (PO <sub>4</sub> ) <sub>6</sub>               | trigonal   | 60%  | -3.9  | 690 |
| 737 | Ti <sub>3</sub> NbCu <sub>2</sub> (PO <sub>4</sub> ) <sub>6</sub>               | trigonal   | 80%  | -1.4  | 710 |
| 738 | Ti <sub>3</sub> NbFe <sub>2</sub> (PO <sub>4</sub> ) <sub>6</sub>               | trigonal   | 60%  | -3.2  | 696 |
| 739 | Ti <sub>3</sub> NbNi <sub>2</sub> (PO <sub>4</sub> ) <sub>6</sub>               | trigonal   | 60%  | -4.4  | 644 |
| 740 | Ti <sub>3</sub> NbV <sub>2</sub> (PO <sub>4</sub> ) <sub>6</sub>                | trigonal   | 70%  | -1.6  | 685 |
| 741 | Ti <sub>3</sub> P <sub>4</sub> (NO <sub>8</sub> ) <sub>2</sub>                  | monoclinic | 70%  | -8.8  | 549 |
| 742 | Ti <sub>3</sub> P <sub>4</sub> (NO <sub>9</sub> ) <sub>2</sub>                  | monoclinic | 60%  | -8.4  | 570 |
| 743 | Ti <sub>3</sub> P <sub>6</sub> WO <sub>24</sub>                                 | trigonal   | 100% | -8.3  | 662 |
| 744 | Ti <sub>3</sub> Sb <sub>2</sub> (PO <sub>4</sub> ) <sub>6</sub>                 | trigonal   | 70%  | -0.4  | 608 |
| 745 | Ti <sub>3</sub> V <sub>2</sub> P <sub>6</sub> WO <sub>24</sub>                  | trigonal   | 70%  | -6.2  | 577 |
| 746 | Ti <sub>3</sub> VSb <sub>2</sub> (PO <sub>4</sub> ) <sub>6</sub>                | trigonal   | 60%  | -6.0  | 694 |
| 747 | Ti <sub>3</sub> VSn <sub>2</sub> (PO <sub>4</sub> ) <sub>6</sub>                | trigonal   | 60%  | -5.1  | 732 |
| 748 | Ti <sub>4</sub> P <sub>6</sub> PbO <sub>24</sub>                                | trigonal   | 80%  | -6.2  | 619 |
| 749 | Ti <sub>6</sub> In <sub>2</sub> Si <sub>2</sub> P <sub>12</sub> O <sub>49</sub> | trigonal   | 70%  | -8.4  | 728 |
| 750 | TiC <sub>7</sub> (NO) <sub>12</sub>                                             | monoclinic | 70%  | -18.9 | 631 |
| 751 | TiCr <sub>3</sub> (PO <sub>4</sub> ) <sub>6</sub>                               | trigonal   | 90%  | -7.8  | 682 |
| 752 | TiFe <sub>3</sub> Sb <sub>2</sub> (PO <sub>4</sub> ) <sub>6</sub>               | trigonal   | 60%  | -6.3  | 699 |

|     |                                                                   |              |      |       |      |
|-----|-------------------------------------------------------------------|--------------|------|-------|------|
| 753 | TiMn <sub>2</sub> Fe <sub>3</sub> (PO <sub>4</sub> ) <sub>6</sub> | trigonal     | 60%  | -0.3  | 677  |
| 754 | TiMn <sub>3</sub> Cu <sub>2</sub> (PO <sub>4</sub> ) <sub>6</sub> | trigonal     | 70%  | -0.8  | 533  |
| 755 | TiNb <sub>3</sub> (PO <sub>4</sub> ) <sub>6</sub>                 | trigonal     | 90%  | -7.8  | 690  |
| 756 | TiNiP <sub>2</sub> O <sub>9</sub>                                 | orthorhombic | 70%  | -9.6  | 581  |
| 757 | TiOF <sub>2</sub>                                                 | monoclinic   | 60%  | -15.4 | 466  |
| 758 | TiP <sub>2</sub> H <sub>2</sub> O <sub>9</sub>                    | monoclinic   | 60%  | -3.5  | 872  |
| 759 | TiP <sub>2</sub> O <sub>7</sub>                                   | cubic        | 80%  | -8.5  | 550  |
| 760 | TiP <sub>6</sub> (WO <sub>8</sub> ) <sub>3</sub>                  | trigonal     | 100% | -7.3  | 582  |
| 761 | TiV <sub>2</sub> O <sub>7</sub>                                   | cubic        | 80%  | -9.9  | 763  |
| 762 | TiV <sub>3</sub> Cu <sub>2</sub> (PO <sub>4</sub> ) <sub>6</sub>  | trigonal     | 80%  | -1.2  | 688  |
| 763 | TiV <sub>3</sub> Sn <sub>2</sub> (PO <sub>4</sub> ) <sub>6</sub>  | trigonal     | 60%  | -5.5  | 694  |
| 764 | Tl <sub>2</sub> Ni <sub>2</sub> (MoO <sub>4</sub> ) <sub>3</sub>  | cubic        | 60%  | -9.0  | 932  |
| 765 | Tl <sub>3</sub> (MoO <sub>4</sub> ) <sub>2</sub>                  | hexagonal    | 60%  | -16.4 | 610  |
| 766 | Tl <sub>3</sub> Hg <sub>2</sub> S <sub>3</sub> ClO <sub>12</sub>  | monoclinic   | 60%  | -15.4 | 392  |
| 767 | TlFeC <sub>3</sub> NO <sub>4</sub>                                | cubic        | 60%  | -11.5 | 655  |
| 768 | TlMo <sub>2</sub> P <sub>3</sub> O <sub>13</sub>                  | monoclinic   | 80%  | -8.6  | 652  |
| 769 | TlPO <sub>3</sub>                                                 | orthorhombic | 60%  | -0.2  | 615  |
| 770 | TmSeClO <sub>3</sub>                                              | orthorhombic | 80%  | -10.1 | 993  |
| 771 | TmTl(MoO <sub>4</sub> ) <sub>2</sub>                              | orthorhombic | 60%  | -15.1 | 1028 |
| 772 | U(ClO) <sub>2</sub>                                               | orthorhombic | 60%  | -15.2 | 1116 |
| 773 | U(MoO <sub>5</sub> ) <sub>12</sub>                                | trigonal     | 80%  | -7.3  | 1192 |
| 774 | U <sub>2</sub> O <sub>5</sub> F <sub>8</sub>                      | orthorhombic | 80%  | -16.0 | 1182 |
| 775 | U <sub>2</sub> PCl <sub>11</sub> O                                | orthorhombic | 70%  | -16.2 | 1200 |
| 776 | U <sub>2</sub> S(NO <sub>5</sub> ) <sub>2</sub>                   | orthorhombic | 90%  | -8.6  | 1068 |
| 777 | U <sub>2</sub> Tl <sub>2</sub> Mo <sub>3</sub> O <sub>16</sub>    | orthorhombic | 80%  | -17.2 | 982  |
| 778 | U <sub>2</sub> V <sub>2</sub> NiO <sub>16</sub>                   | orthorhombic | 80%  | -3.9  | 1082 |
| 779 | U <sub>3</sub> (PO <sub>9</sub> ) <sub>2</sub>                    | orthorhombic | 100% | -8.5  | 1080 |
| 780 | U <sub>3</sub> O <sub>11</sub>                                    | orthorhombic | 90%  | -13.4 | 974  |
| 781 | UBCO <sub>5</sub>                                                 | orthorhombic | 60%  | -31.1 | 1079 |
| 782 | UC <sub>2</sub> O <sub>7</sub>                                    | orthorhombic | 70%  | -15.2 | 1089 |
| 783 | UC <sub>2</sub> Se <sub>2</sub> (NO <sub>6</sub> ) <sub>2</sub>   | orthorhombic | 80%  | -11.5 | 1150 |
| 784 | UC <sub>4</sub> O <sub>7</sub>                                    | orthorhombic | 60%  | -9.4  | 1072 |
| 785 | UCrO <sub>9</sub>                                                 | monoclinic   | 100% | -8.1  | 1039 |
| 786 | UCu(Mo <sub>2</sub> O <sub>9</sub> ) <sub>6</sub>                 | trigonal     | 70%  | -6.6  | 1192 |
| 787 | UN <sub>2</sub> O <sub>7</sub>                                    | orthorhombic | 70%  | -19.1 | 1074 |
| 788 | UO <sub>3</sub>                                                   | cubic        | 80%  | -17.0 | 945  |
| 789 | UPO <sub>5</sub>                                                  | orthorhombic | 70%  | -1.2  | 950  |

|     |                                                                  |              |      |       |      |
|-----|------------------------------------------------------------------|--------------|------|-------|------|
| 790 | UV <sub>2</sub> O <sub>8</sub>                                   | orthorhombic | 90%  | -9.3  | 1055 |
| 791 | V(Bi <sub>5</sub> O <sub>8</sub> ) <sub>5</sub>                  | monoclinic   | 60%  | -8.3  | 658  |
| 792 | V(PO <sub>3</sub> ) <sub>4</sub>                                 | orthorhombic | 80%  | -2.6  | 758  |
| 793 | V <sub>2</sub> (PO <sub>4</sub> ) <sub>3</sub>                   | trigonal     | 60%  | -8.4  | 660  |
| 794 | V <sub>2</sub> AgP <sub>3</sub> O <sub>11</sub>                  | monoclinic   | 80%  | -4.7  | 522  |
| 795 | V <sub>2</sub> CoO <sub>8</sub>                                  | orthorhombic | 60%  | -9.3  | 599  |
| 796 | V <sub>2</sub> CrO <sub>7</sub>                                  | cubic        | 70%  | -2.7  | 699  |
| 797 | V <sub>2</sub> Cu(PO <sub>4</sub> ) <sub>3</sub>                 | trigonal     | 90%  | -2.1  | 644  |
| 798 | V <sub>2</sub> Fe <sub>3</sub> P <sub>6</sub> WO <sub>24</sub>   | trigonal     | 70%  | -2.9  | 642  |
| 799 | V <sub>2</sub> Fe <sub>3</sub> Sb(PO <sub>4</sub> ) <sub>6</sub> | trigonal     | 60%  | -3.1  | 638  |
| 800 | V <sub>2</sub> Fe <sub>3</sub> Sn(PO <sub>4</sub> ) <sub>6</sub> | trigonal     | 60%  | -6.5  | 583  |
| 801 | V <sub>2</sub> Hg <sub>2</sub> O <sub>7</sub>                    | orthorhombic | 80%  | -12.3 | 618  |
| 802 | V <sub>2</sub> NiO <sub>8</sub>                                  | orthorhombic | 60%  | -8.8  | 628  |
| 803 | V <sub>2</sub> O <sub>5</sub>                                    | orthorhombic | 70%  | -8.9  | 784  |
| 804 | V <sub>2</sub> P <sub>2</sub> O <sub>9</sub>                     | orthorhombic | 80%  | -10.3 | 623  |
| 805 | V <sub>2</sub> SnO <sub>7</sub>                                  | cubic        | 100% | -7.6  | 560  |
| 806 | V <sub>2</sub> SO <sub>8</sub>                                   | orthorhombic | 70%  | -9.3  | 597  |
| 807 | V <sub>3</sub> (PO <sub>4</sub> ) <sub>4</sub>                   | monoclinic   | 90%  | -6.9  | 716  |
| 808 | V <sub>3</sub> Bi <sub>2</sub> (PO <sub>4</sub> ) <sub>6</sub>   | trigonal     | 80%  | -1.2  | 612  |
| 809 | V <sub>3</sub> Co <sub>2</sub> P <sub>6</sub> WO <sub>24</sub>   | trigonal     | 60%  | -4.4  | 580  |
| 810 | V <sub>3</sub> CoSb <sub>2</sub> (PO <sub>4</sub> ) <sub>6</sub> | trigonal     | 60%  | -7.4  | 612  |
| 811 | V <sub>3</sub> CoSn <sub>2</sub> (PO <sub>4</sub> ) <sub>6</sub> | trigonal     | 60%  | -7.4  | 612  |
| 812 | V <sub>3</sub> Cr(PO <sub>4</sub> ) <sub>6</sub>                 | trigonal     | 80%  | -7.7  | 656  |
| 813 | V <sub>3</sub> Cr <sub>2</sub> Sn(PO <sub>4</sub> ) <sub>6</sub> | trigonal     | 90%  | -2.2  | 659  |
| 814 | V <sub>3</sub> CrSb <sub>2</sub> (PO <sub>4</sub> ) <sub>6</sub> | trigonal     | 60%  | -7.3  | 662  |
| 815 | V <sub>3</sub> CrSn <sub>2</sub> (PO <sub>4</sub> ) <sub>6</sub> | trigonal     | 60%  | -7.0  | 661  |
| 816 | V <sub>3</sub> Cu(PO <sub>4</sub> ) <sub>6</sub>                 | trigonal     | 80%  | -7.6  | 636  |
| 817 | V <sub>3</sub> Cu <sub>2</sub> Ni(PO <sub>4</sub> ) <sub>6</sub> | trigonal     | 90%  | -3.3  | 591  |
| 818 | V <sub>3</sub> Cu <sub>2</sub> P <sub>6</sub> WO <sub>24</sub>   | trigonal     | 90%  | -4.4  | 589  |
| 819 | V <sub>3</sub> Cu <sub>2</sub> Sb(PO <sub>4</sub> ) <sub>6</sub> | trigonal     | 90%  | -3.3  | 601  |
| 820 | V <sub>3</sub> Cu <sub>2</sub> Sn(PO <sub>4</sub> ) <sub>6</sub> | trigonal     | 90%  | -3.3  | 610  |
| 821 | V <sub>3</sub> Cu <sub>2</sub> Te(PO <sub>4</sub> ) <sub>6</sub> | trigonal     | 90%  | -4.2  | 603  |
| 822 | V <sub>3</sub> Fe <sub>2</sub> Sb(PO <sub>4</sub> ) <sub>6</sub> | trigonal     | 60%  | -7.3  | 595  |
| 823 | V <sub>3</sub> Fe <sub>2</sub> Te(PO <sub>4</sub> ) <sub>6</sub> | trigonal     | 60%  | -7.5  | 595  |
| 824 | V <sub>3</sub> Ni(PO <sub>4</sub> ) <sub>6</sub>                 | trigonal     | 60%  | -7.6  | 638  |
| 825 | V <sub>3</sub> Ni <sub>2</sub> P <sub>6</sub> WO <sub>24</sub>   | trigonal     | 70%  | -6.4  | 586  |
| 826 | V <sub>3</sub> P <sub>4</sub> O <sub>15</sub>                    | orthorhombic | 90%  | -10.5 | 714  |

|     |                     |              |      |       |      |
|-----|---------------------|--------------|------|-------|------|
| 827 | $V_3P_4WO_{20}$     | monoclinic   | 70%  | -11.1 | 690  |
| 828 | $V_3P_6WO_{24}$     | trigonal     | 100% | -8.4  | 661  |
| 829 | $V_3S_2NO_{12}$     | monoclinic   | 70%  | -7.3  | 609  |
| 830 | $V_3Sb(PO_4)_6$     | trigonal     | 70%  | -4.7  | 656  |
| 831 | $V_3Sb_2(PO_4)_6$   | trigonal     | 70%  | -2.9  | 689  |
| 832 | $V_4(P_2O_7)_3$     | orthorhombic | 90%  | -10.7 | 698  |
| 833 | $V_4CuNiO_{12}$     | monoclinic   | 80%  | -0.3  | 550  |
| 834 | $V_5P_6WO_{24}$     | trigonal     | 70%  | -4.3  | 578  |
| 835 | $V_5Sb(PO_4)_6$     | trigonal     | 60%  | -5.4  | 592  |
| 836 | $VAsO_5$            | orthorhombic | 70%  | -5.5  | 491  |
| 837 | $VCdClO_3$          | orthorhombic | 80%  | -12.8 | 596  |
| 838 | $VCdPO_7$           | monoclinic   | 80%  | -7.7  | 497  |
| 839 | $VCo(PO_4)_2$       | trigonal     | 60%  | -5.6  | 596  |
| 840 | $VCr_3(PO_4)_6$     | trigonal     | 90%  | -7.8  | 669  |
| 841 | $VFe_3Sb_2(PO_4)_6$ | trigonal     | 60%  | -7.4  | 622  |
| 842 | $VHg_4P_2O_9$       | orthorhombic | 60%  | -16.8 | 561  |
| 843 | $VNi_3Sb_2(PO_4)_6$ | trigonal     | 60%  | -7.4  | 611  |
| 844 | $VNiP_2O_9$         | orthorhombic | 80%  | -10.2 | 616  |
| 845 | $VP_2O_7$           | monoclinic   | 80%  | -10.5 | 617  |
| 846 | $VP_6(WO_8)_3$      | trigonal     | 100% | -7.2  | 579  |
| 847 | $VPN_2O_5$          | monoclinic   | 80%  | -16.6 | 558  |
| 848 | $VPNO_6$            | monoclinic   | 90%  | -9.3  | 545  |
| 849 | $VPO_5$             | orthorhombic | 90%  | -10.5 | 708  |
| 850 | $VSO_4F_3$          | orthorhombic | 70%  | -6.6  | 637  |
| 851 | $VZnPbO_5$          | orthorhombic | 60%  | -11.6 | 658  |
| 852 | $W(CO)_6$           | orthorhombic | 70%  | -18.5 | 565  |
| 853 | $W_3C_7NCl_6O_7$    | orthorhombic | 70%  | -17.9 | 786  |
| 854 | $W_3O_8$            | hexagonal    | 70%  | -8.5  | 607  |
| 855 | $W_7(OF_5)_6$       | trigonal     | 80%  | -6.8  | 584  |
| 856 | $WN_2(OF_2)_2$      | monoclinic   | 60%  | -10.0 | 520  |
| 857 | $WN_2(OF_4)_2$      | orthorhombic | 70%  | -9.9  | 578  |
| 858 | $WO_2$              | hexagonal    | 70%  | -8.1  | 748  |
| 859 | $WO_3$              | cubic        | 90%  | -10.5 | 491  |
| 860 | $Y(PO_3)_3$         | trigonal     | 70%  | -6.7  | 1216 |
| 861 | $Y_2(SeO_4)_3$      | orthorhombic | 100% | -2.7  | 1139 |
| 862 | $Y_2(SO_4)_3$       | orthorhombic | 60%  | -4.5  | 1162 |
| 863 | $YAgO_2$            | hexagonal    | 70%  | -11.0 | 1032 |



|     |                                                                               |              |      |       |      |
|-----|-------------------------------------------------------------------------------|--------------|------|-------|------|
| 864 | Yb(PO <sub>3</sub> ) <sub>3</sub>                                             | trigonal     | 90%  | -8.0  | 1132 |
| 865 | Yb <sub>4</sub> Br <sub>6</sub> O                                             | hexagonal    | 70%  | -16.3 | 1095 |
| 866 | YbI <sub>2</sub> O                                                            | orthorhombic | 60%  | -18.8 | 1087 |
| 867 | YbP <sub>3</sub> O <sub>10</sub>                                              | monoclinic   | 90%  | -6.4  | 1038 |
| 868 | YbSeClO <sub>3</sub>                                                          | orthorhombic | 90%  | -9.1  | 973  |
| 869 | YbTl(MoO <sub>4</sub> ) <sub>2</sub>                                          | orthorhombic | 60%  | -16.2 | 1008 |
| 870 | YSeClO <sub>3</sub>                                                           | orthorhombic | 70%  | -26.9 | 1084 |
| 871 | Zn <sub>2</sub> MoSeO <sub>7</sub>                                            | monoclinic   | 60%  | -5.6  | 510  |
| 872 | Zn <sub>2</sub> P <sub>3</sub> C(NO <sub>4</sub> ) <sub>3</sub>               | monoclinic   | 70%  | -15.1 | 458  |
| 873 | Zn <sub>2</sub> SiO <sub>4</sub>                                              | trigonal     | 80%  | -1.9  | 381  |
| 874 | Zn <sub>2</sub> TeMoO <sub>7</sub>                                            | monoclinic   | 60%  | -2.4  | 565  |
| 875 | Zn <sub>3</sub> (PO <sub>6</sub> ) <sub>2</sub>                               | orthorhombic | 90%  | -7.2  | 435  |
| 876 | Zn <sub>4</sub> As <sub>3</sub> C <sub>3</sub> N <sub>3</sub> O <sub>13</sub> | monoclinic   | 70%  | -13.2 | 420  |
| 877 | Zn <sub>4</sub> P <sub>3</sub> C <sub>3</sub> N <sub>3</sub> O <sub>13</sub>  | monoclinic   | 70%  | -13.8 | 461  |
| 878 | ZnAsNO <sub>4</sub>                                                           | monoclinic   | 70%  | -10.6 | 390  |
| 879 | ZnAsWO <sub>5</sub>                                                           | monoclinic   | 70%  | -12.2 | 510  |
| 880 | ZnBi <sub>2</sub> P <sub>2</sub> O <sub>9</sub>                               | orthorhombic | 60%  | -1.8  | 477  |
| 881 | ZnC <sub>2</sub> S <sub>2</sub> (OF) <sub>6</sub>                             | trigonal     | 60%  | -6.0  | 507  |
| 882 | ZnCr <sub>2</sub> O <sub>7</sub>                                              | monoclinic   | 70%  | -0.1  | 580  |
| 883 | ZnCuP <sub>2</sub> O <sub>7</sub>                                             | monoclinic   | 100% | -4.3  | 175  |
| 884 | ZnFe <sub>2</sub> (P <sub>2</sub> O <sub>7</sub> ) <sub>2</sub>               | orthorhombic | 80%  | -9.8  | 707  |
| 885 | ZnFe <sub>2</sub> (PO <sub>4</sub> ) <sub>2</sub>                             | monoclinic   | 80%  | -3.3  | 534  |
| 886 | ZnMo <sub>2</sub> O <sub>7</sub>                                              | monoclinic   | 90%  | -10.0 | 589  |
| 887 | ZnMo <sub>2</sub> P <sub>2</sub> O <sub>9</sub>                               | orthorhombic | 80%  | -9.0  | 602  |
| 888 | ZnMo <sub>3</sub> O <sub>7</sub>                                              | orthorhombic | 70%  | -8.6  | 696  |
| 889 | ZnMoAsO <sub>5</sub>                                                          | monoclinic   | 60%  | -4.4  | 511  |
| 890 | ZnMoO <sub>6</sub>                                                            | monoclinic   | 90%  | -9.0  | 688  |
| 891 | ZnNiMoP <sub>2</sub> O <sub>9</sub>                                           | orthorhombic | 90%  | -7.0  | 576  |
| 892 | ZnNiSnP <sub>2</sub> O <sub>9</sub>                                           | orthorhombic | 60%  | -4.7  | 293  |
| 893 | ZnP <sub>2</sub> (WO <sub>5</sub> ) <sub>2</sub>                              | orthorhombic | 60%  | -6.0  | 515  |
| 894 | ZnP <sub>2</sub> W <sub>2</sub> O <sub>9</sub>                                | orthorhombic | 60%  | -8.3  | 570  |
| 895 | ZnPNO <sub>4</sub>                                                            | monoclinic   | 80%  | -6.7  | 425  |
| 896 | ZnSn <sub>2</sub> P <sub>2</sub> O <sub>9</sub>                               | orthorhombic | 70%  | -5.8  | 437  |
| 897 | ZnSnAsO <sub>5</sub>                                                          | monoclinic   | 70%  | -4.8  | 241  |
| 898 | ZnW <sub>2</sub> O <sub>7</sub>                                               | monoclinic   | 90%  | -16.4 | 503  |
| 899 | Zr(AsO <sub>5</sub> ) <sub>2</sub>                                            | monoclinic   | 70%  | -2.4  | 557  |
| 900 | Zr(PO <sub>5</sub> ) <sub>2</sub>                                             | monoclinic   | 70%  | -3.8  | 681  |

|     |                                                   |              |      |       |     |
|-----|---------------------------------------------------|--------------|------|-------|-----|
| 901 | Zr <sub>2</sub> (PO <sub>4</sub> ) <sub>3</sub>   | trigonal     | 80%  | -3.7  | 740 |
| 902 | Zr <sub>2</sub> Ga(PO <sub>4</sub> ) <sub>3</sub> | trigonal     | 70%  | -3.0  | 760 |
| 903 | Zr <sub>4</sub> Cd(PO <sub>4</sub> ) <sub>6</sub> | trigonal     | 80%  | -0.6  | 759 |
| 904 | ZrFe(PO <sub>4</sub> ) <sub>3</sub>               | orthorhombic | 70%  | -10.9 | 729 |
| 905 | ZrO <sub>3</sub> F <sub>5</sub>                   | orthorhombic | 60%  | -0.5  | 969 |
| 906 | ZrP <sub>2</sub> CO <sub>6</sub>                  | monoclinic   | 60%  | -8.1  | 493 |
| 907 | ZrP <sub>2</sub> N <sub>3</sub> O <sub>8</sub> F  | monoclinic   | 60%  | -12.3 | 889 |
| 908 | ZrP <sub>2</sub> O <sub>7</sub>                   | cubic        | 100% | -9.6  | 619 |

**Table S2** NTE prediction set (Cyanides). T2 is the upper temperature limit, and the lower temperature limit is uniformly set as 0K. NTE is set to one decimal place, T2 to an integer.

| No. | Formula                                                                                                                                      | Crystal System | Probability (%) | NTE (ppm/K) | T2(K) |
|-----|----------------------------------------------------------------------------------------------------------------------------------------------|----------------|-----------------|-------------|-------|
| 1   | ((C H <sub>3</sub> ) C Cl <sub>3</sub> ) Cd (C N) <sub>2</sub>                                                                               | cubic          | 60%             | -27.5       | 773   |
| 2   | ((C H <sub>3</sub> ) <sub>4</sub> N) (Cu Zn (C N) <sub>4</sub> )                                                                             | cubic          | 60%             | -6.2        | 840   |
| 3   | ((C H <sub>3</sub> ) <sub>4</sub> N) <sub>2</sub> Mn (Cl <sub>12</sub> (Nb (C N)) <sub>6</sub> )                                             | cubic          | 60%             | -6.2        | 683   |
| 4   | ((Co (H <sub>2</sub> O) <sub>2</sub> ) <sub>2</sub> Mo (C N) <sub>8</sub> ) (H <sub>2</sub> O) <sub>4</sub>                                  | tetragonal     | 60%             | -8.8        | 521   |
| 5   | ((N (C H <sub>3</sub> ) <sub>4</sub> ) (Cu Zn (C N) <sub>4</sub> )) (C Cl <sub>4</sub> ) <sub>0.9</sub>                                      | cubic          | 80%             | -3.8        | 835   |
| 6   | (Cd (C N) <sub>2</sub> ) (C (C H <sub>3</sub> ) <sub>2</sub> Cl <sub>2</sub> )                                                               | cubic          | 60%             | -9.6        | 813   |
| 7   | (Cd (C N) <sub>2</sub> ) (C Cl <sub>4</sub> )                                                                                                | cubic          | 60%             | -26.9       | 817   |
| 8   | (Cd Hg (C N) <sub>4</sub> ) (C Cl <sub>4</sub> ) <sub>2</sub>                                                                                | cubic          | 70%             | -15.4       | 811   |
| 9   | (Cd Zn (C N) <sub>4</sub> ) (C Cl <sub>4</sub> ) <sub>2</sub>                                                                                | cubic          | 60%             | -28.6       | 812   |
| 10  | (Cd <sub>3</sub> (Co <sub>0.5</sub> Cr <sub>0.5</sub> (C N) <sub>6</sub> ) <sub>2</sub> (H <sub>2</sub> O) <sub>15</sub> ) <sub>1.3333</sub> | cubic          | 60%             | -28.0       | 320   |
| 11  | (Co <sub>3</sub> Fe <sub>2</sub> (C N) <sub>12</sub> (H <sub>2</sub> O) <sub>14</sub> ) <sub>1.33</sub>                                      | cubic          | 60%             | -26.1       | 319   |
| 12  | (Cu (H <sub>2</sub> O) <sub>2</sub> ) <sub>2</sub> (Mo (C N) <sub>8</sub> ) (H <sub>2</sub> O) <sub>2</sub>                                  | tetragonal     | 60%             | -24.0       | 446   |
| 13  | (La <sub>0.75</sub> Pr <sub>0.25</sub> ) Co (C N) <sub>6</sub> (H <sub>2</sub> O) <sub>5</sub>                                               | hexagonal      | 60%             | -11.0       | 439   |
| 14  | Al (C N) <sub>3</sub>                                                                                                                        | cubic          | 60%             | -3.3        | 504   |
| 15  | Am (Ag (C N) <sub>2</sub> ) <sub>3</sub> (H <sub>2</sub> O) <sub>3</sub>                                                                     | hexagonal      | 60%             | -7.9        | 301   |
| 16  | Be (C N) <sub>2</sub>                                                                                                                        | cubic          | 90%             | -9.4        | 453   |
| 17  | C <sub>8</sub> H <sub>12</sub> Mn <sub>2</sub> Mo N <sub>12</sub> O <sub>5</sub>                                                             | tetragonal     | 60%             | -36.0       | 538   |
| 18  | Ca K <sub>4</sub> (Re <sub>3</sub> Mo <sub>3</sub> S <sub>8</sub> (C N) <sub>6</sub> ) (H <sub>2</sub> O) <sub>8</sub>                       | cubic          | 60%             | -9.8        | 725   |
| 19  | Cd (Cr <sub>0.333</sub> Ir <sub>0.333</sub> (C N) <sub>4</sub> ) (H <sub>2</sub> O) <sub>4.333</sub>                                         | cubic          | 60%             | -11.9       | 320   |
| 20  | Cd <sub>4</sub> ((Fe <sub>1.333</sub> Co <sub>1.333</sub> ) (C N) <sub>16</sub> ) (H <sub>2</sub> O) <sub>18.667</sub>                       | cubic          | 60%             | -38.1       | 319   |
| 21  | Co (Co <sub>0.333</sub> Ir <sub>0.333</sub> (C N) <sub>4</sub> ) (H <sub>2</sub> O) <sub>4.333</sub>                                         | cubic          | 60%             | -32.3       | 337   |
| 22  | Cs <sub>2.75</sub> K <sub>1.25</sub> (Re <sub>6</sub> Se <sub>8</sub> (C N) <sub>4</sub> (O H) <sub>2</sub> ) (H <sub>2</sub> O)             | tetragonal     | 60%             | -14.4       | 858   |
| 23  | Cs <sub>6</sub> ((Re <sub>6</sub> (C N) <sub>3</sub> S <sub>8</sub> ) <sub>2</sub> S C)                                                      | hexagonal      | 60%             | -18.2       | 815   |
| 24  | Fe (Co <sub>0.2</sub> Fe <sub>0.8</sub> (C N) <sub>6</sub> )                                                                                 | cubic          | 100%            | -11.1       | 443   |
| 25  | Fe (Fe <sub>0.97</sub> (C N) <sub>6</sub> ) <sub>0.88</sub> (H <sub>2</sub> O) <sub>0.473</sub>                                              | cubic          | 60%             | -8.7        | 463   |

|    |                                                                                                                       |              |     |       |     |
|----|-----------------------------------------------------------------------------------------------------------------------|--------------|-----|-------|-----|
| 26 | $\text{Fe}_4 \text{Fe}_{3-00} (\text{C N})_{18-0} (\text{H}_2 \text{O})_{11-0}$                                       | cubic        | 60% | -41.8 | 715 |
| 27 | $\text{Ga} (\text{C N})_3$                                                                                            | cubic        | 90% | -8.1  | 387 |
| 28 | $\text{H}_{0.2} (\text{Ru}_2 (\text{O}_2 \text{C} (\text{C H}_3))_4)_{2-8} (\text{Cr} (\text{C N})_5 \text{N O})$     | cubic        | 60% | -0.6  | 684 |
| 29 | $\text{In} (\text{C N})_3$                                                                                            | cubic        | 80% | -21.9 | 383 |
| 30 | $\text{In}_{0-08} \text{Eu}_4 (\text{N C N})_3 \text{I}_3$                                                            | hexagonal    | 60% | -2.3  | 600 |
| 31 | $\text{K Cu} ((\text{Co}_{0.7} \text{Fe}_{0.3}) (\text{C N})_6)$                                                      | cubic        | 60% | -7.6  | 264 |
| 32 | $\text{K}_{1.9} (\text{Fe}_4 \text{Fe}_{3-00} (\text{C N})_{18-00}) ((\text{O H})_{1.9} (\text{H}_2 \text{O})_{7-0})$ | cubic        | 60% | -4.7  | 784 |
| 33 | $\text{K}_6 (\text{Mo}_3 \text{Re}_3 \text{S}_8 (\text{C N})_5)$                                                      | tetragonal   | 60% | -6.6  | 553 |
| 34 | $\text{K}_6 (\text{Se}_8 (\text{Mo}_6 (\text{C N})_5))$                                                               | tetragonal   | 60% | -9.7  | 603 |
| 35 | $\text{Li Eu}_2 (\text{N C N}) \text{I}_3$                                                                            | cubic        | 60% | -28.5 | 757 |
| 36 | $\text{Mn} (\text{C N})_2$                                                                                            | cubic        | 90% | -33.3 | 442 |
| 37 | $\text{Na}_{0.5} \text{Fe} (\text{Fe} (\text{C N})_6)$                                                                | cubic        | 90% | -8.5  | 448 |
| 38 | $\text{Na}_{0.52} \text{Fe} (\text{Fe} (\text{C N})_6)$                                                               | cubic        | 90% | -7.3  | 447 |
| 39 | $\text{Na}_{0.55} \text{Fe} (\text{Fe} (\text{C N})_6)$                                                               | cubic        | 90% | -12.9 | 446 |
| 40 | $\text{Nd} (\text{Ag} (\text{C N})_2)_3 (\text{H}_2 \text{O})_3$                                                      | hexagonal    | 60% | -7.7  | 305 |
| 41 | $\text{Ni} (\text{C N})_2 (\text{N H}_3)$                                                                             | tetragonal   | 60% | -4.4  | 390 |
| 42 | $\text{Pd} (\text{C N})_2$                                                                                            | tetragonal   | 60% | -8.1  | 317 |
| 43 | $\text{Pr} (\text{Ag} (\text{C N})_2)_3 (\text{H}_2 \text{O})_3$                                                      | hexagonal    | 60% | -7.7  | 302 |
| 44 | $\text{Pr Co} (\text{C N})_6 (\text{H}_2 \text{O})_5$                                                                 | hexagonal    | 60% | -11.1 | 440 |
| 45 | $\text{Pt} (\text{C N})_2$                                                                                            | tetragonal   | 60% | -2.2  | 346 |
| 46 | $\text{Tl C N}$                                                                                                       | cubic        | 60% | -11.1 | 283 |
| 47 | $\text{Zn}[\text{N}(\text{CN})_2]_2$                                                                                  | orthorhombic | 80% | -11.8 | 431 |

**Table S3** NTE prediction set (Fluorides). T2 is the upper temperature limit, and the lower temperature limit is uniformly set as 0K. NTE is set to one decimal place, T2 to an integer.

| No. | Formula                                             | Crystal System | Probability (%) | NTE (ppm/K) | T2(K) |
|-----|-----------------------------------------------------|----------------|-----------------|-------------|-------|
| 1   | $\text{AcF}_3$                                      | cubic          | 90%             | -28.2       | 375   |
| 2   | $\text{Ba}_{18}\text{In}_8(\text{S}_7\text{F}_6)_3$ | tetragonal     | 60%             | -19.1       | 873   |
| 3   | $\text{Ba}_3\text{Ti}_2(\text{O}_3\text{F}_5)_2$    | tetragonal     | 60%             | -10.5       | 698   |
| 4   | $\text{BaTaF}_7$                                    | cubic          | 70%             | -3.0        | 990   |
| 5   | $\text{BNF}_8$                                      | tetragonal     | 60%             | -11.4       | 419   |
| 6   | $\text{CaSnF}_4$                                    | tetragonal     | 60%             | -21.9       | 399   |
| 7   | $\text{CaSnF}_6$                                    | cubic          | 100%            | -6.2        | 200   |
| 8   | $\text{CaTbF}_6$                                    | tetragonal     | 60%             | -22.8       | 650   |
| 9   | $\text{CrRu}(\text{NF})_6$                          | cubic          | 60%             | -9.0        | 973   |
| 10  | $\text{Cs}_2\text{SCL}_6\text{F}$                   | cubic          | 60%             | -7.2        | 576   |
| 11  | $\text{CsCu}_2\text{F}_6$                           | cubic          | 60%             | -12.5       | 548   |

|    |                                                                |            |      |       |      |
|----|----------------------------------------------------------------|------------|------|-------|------|
| 12 | Cu <sub>2</sub> OF <sub>2</sub>                                | tetragonal | 60%  | -5.6  | 518  |
| 13 | Cu <sub>4</sub> OF <sub>6</sub>                                | tetragonal | 60%  | -10.0 | 555  |
| 14 | Fe(NF <sub>2</sub> ) <sub>3</sub>                              | cubic      | 60%  | -10.2 | 467  |
| 15 | GdF <sub>3</sub>                                               | cubic      | 70%  | -25.5 | 544  |
| 16 | HfFeF <sub>6</sub>                                             | cubic      | 90%  | -11.3 | 737  |
| 17 | HfMnF <sub>6</sub>                                             | cubic      | 90%  | -17.9 | 745  |
| 18 | HfTiF <sub>6</sub>                                             | cubic      | 100% | -16.7 | 500  |
| 19 | HfVF <sub>6</sub>                                              | cubic      | 100% | -8.3  | 738  |
| 20 | Hg <sub>3</sub> F                                              | cubic      | 60%  | -24.3 | 313  |
| 21 | K <sub>2</sub> AgAsF <sub>6</sub>                              | cubic      | 60%  | -3.6  | 585  |
| 22 | K <sub>2</sub> AgSbF <sub>6</sub>                              | cubic      | 60%  | -3.1  | 591  |
| 23 | K <sub>2</sub> CuSbF <sub>6</sub>                              | cubic      | 60%  | -3.6  | 585  |
| 24 | KHo <sub>3</sub> F <sub>10</sub>                               | cubic      | 60%  | -13.7 | 972  |
| 25 | KTb <sub>3</sub> F <sub>10</sub>                               | cubic      | 60%  | -15.7 | 956  |
| 26 | KY <sub>3</sub> F <sub>10</sub>                                | cubic      | 60%  | -15.5 | 959  |
| 27 | LaF <sub>3</sub>                                               | cubic      | 70%  | -33.0 | 319  |
| 28 | LiVF <sub>6</sub>                                              | cubic      | 80%  | -26.1 | 364  |
| 29 | LuF <sub>3</sub>                                               | cubic      | 90%  | -24.4 | 377  |
| 30 | Mn <sub>2</sub> Hg <sub>2</sub> SF <sub>6</sub>                | cubic      | 60%  | -9.8  | 637  |
| 31 | MoF <sub>3</sub>                                               | cubic      | 60%  | -7.5  | 442  |
| 32 | NaSc(NF <sub>3</sub> ) <sub>2</sub>                            | cubic      | 80%  | -23.1 | 369  |
| 33 | NaTh <sub>2</sub> F <sub>9</sub>                               | tetragonal | 60%  | -2.3  | 651  |
| 34 | NaUF <sub>6</sub>                                              | cubic      | 60%  | -6.3  | 644  |
| 35 | NaV(NF <sub>3</sub> ) <sub>2</sub>                             | cubic      | 70%  | -16.0 | 401  |
| 36 | NbF <sub>3</sub>                                               | cubic      | 90%  | -7.8  | 471  |
| 37 | NpF <sub>5</sub>                                               | tetragonal | 60%  | -5.8  | 560  |
| 38 | PNF <sub>6</sub>                                               | cubic      | 80%  | -21.6 | 442  |
| 39 | Pt <sub>3</sub> F                                              | cubic      | 70%  | -9.9  | 359  |
| 40 | Rb <sub>2</sub> CuAsF <sub>6</sub>                             | cubic      | 60%  | -3.0  | 595  |
| 41 | Rb <sub>2</sub> SCl <sub>6</sub> F                             | cubic      | 70%  | -12.2 | 534  |
| 42 | Rb <sub>5</sub> Nb <sub>3</sub> OF <sub>18</sub>               | tetragonal | 70%  | -8.6  | 676  |
| 43 | RbEu <sub>3</sub> F <sub>10</sub>                              | cubic      | 60%  | -15.8 | 972  |
| 44 | RbTb <sub>3</sub> F <sub>10</sub>                              | cubic      | 60%  | -15.7 | 957  |
| 45 | ReC <sub>3</sub> O <sub>4</sub> F                              | tetragonal | 80%  | -10.0 | 715  |
| 46 | Sc(NF <sub>2</sub> ) <sub>3</sub>                              | cubic      | 60%  | -11.7 | 467  |
| 47 | ScC <sub>3</sub> (N <sub>3</sub> F <sub>2</sub> ) <sub>3</sub> | cubic      | 70%  | -39.2 | 1074 |
| 48 | Si(NF <sub>3</sub> ) <sub>2</sub>                              | cubic      | 60%  | -8.5  | 470  |
| 49 | SiF <sub>4</sub>                                               | cubic      | 60%  | -15.3 | 501  |

|    |                                                                 |            |      |       |      |
|----|-----------------------------------------------------------------|------------|------|-------|------|
| 50 | SNF                                                             | tetragonal | 80%  | -31.9 | 541  |
| 51 | SrAlF <sub>5</sub>                                              | tetragonal | 60%  | -15.6 | 992  |
| 52 | SrCrF <sub>5</sub>                                              | tetragonal | 80%  | -9.6  | 673  |
| 53 | SrPdF <sub>4</sub>                                              | tetragonal | 60%  | -10.0 | 544  |
| 54 | TaAgF <sub>6</sub>                                              | tetragonal | 90%  | -0.4  | 364  |
| 55 | TaCl <sub>4</sub> F                                             | tetragonal | 90%  | -11.3 | 711  |
| 56 | TaF <sub>3</sub>                                                | cubic      | 100% | -13.4 | 402  |
| 57 | TbCd <sub>2</sub> F <sub>8</sub>                                | tetragonal | 60%  | -12.9 | 561  |
| 58 | TbCdF <sub>6</sub>                                              | tetragonal | 60%  | -12.8 | 558  |
| 59 | Ti(NF <sub>2</sub> ) <sub>3</sub>                               | cubic      | 60%  | -10.8 | 469  |
| 60 | TiCuNO <sub>4</sub> F <sub>7</sub>                              | tetragonal | 70%  | -20.3 | 392  |
| 61 | TiF <sub>2</sub>                                                | cubic      | 80%  | -13.6 | 573  |
| 62 | TiF <sub>3</sub>                                                | cubic      | 60%  | -8.8  | 625  |
| 63 | TiZnF <sub>4</sub>                                              | tetragonal | 80%  | -12.9 | 329  |
| 64 | Tl <sub>2</sub> VF <sub>6</sub>                                 | cubic      | 60%  | -1.7  | 699  |
| 65 | TmF <sub>3</sub>                                                | cubic      | 80%  | -24.1 | 383  |
| 66 | UF <sub>3</sub>                                                 | cubic      | 60%  | -26.5 | 521  |
| 67 | UF <sub>5</sub>                                                 | tetragonal | 60%  | -6.3  | 559  |
| 68 | UOF <sub>4</sub>                                                | tetragonal | 70%  | -3.7  | 654  |
| 69 | V(NF <sub>2</sub> ) <sub>3</sub>                                | cubic      | 70%  | -0.6  | 488  |
| 70 | V(NF <sub>3</sub> ) <sub>2</sub>                                | cubic      | 70%  | -8.7  | 479  |
| 71 | VF <sub>5</sub>                                                 | tetragonal | 70%  | -23.6 | 559  |
| 72 | VRu(NF) <sub>6</sub>                                            | cubic      | 60%  | -8.0  | 966  |
| 73 | WO <sub>2</sub> F                                               | tetragonal | 100% | -14.8 | 472  |
| 74 | WOF <sub>4</sub>                                                | tetragonal | 90%  | -1.0  | 482  |
| 75 | Y <sub>3</sub> NF <sub>10</sub>                                 | cubic      | 90%  | -14.0 | 1001 |
| 76 | YbF <sub>3</sub>                                                | cubic      | 80%  | -19.4 | 415  |
| 77 | YF <sub>3</sub>                                                 | cubic      | 60%  | -26.3 | 516  |
| 78 | Zn(NF <sub>2</sub> ) <sub>2</sub>                               | tetragonal | 60%  | -3.9  | 473  |
| 79 | Zr <sub>3</sub> Pb(O <sub>2</sub> F <sub>3</sub> ) <sub>2</sub> | cubic      | 60%  | -3.1  | 635  |
| 80 | ZrCrF <sub>6</sub>                                              | cubic      | 80%  | -5.0  | 647  |
| 81 | ZrTiF <sub>6</sub>                                              | cubic      | 100% | -23.0 | 586  |
| 82 | ZrVF <sub>6</sub>                                               | cubic      | 100% | -4.1  | 647  |
